# Supplementary material for: First 4,7-oxygenated 1,10-phenanthroline-2,9-diamides: synthesis, tautomerism and complexation with REE nitrates
Source: Royal Society of Chemistry journal article supplement (doi:10.1039/d3dt03643j), 2024-01-01
Supplement: d3dt03643j1.pdf [file d3dt03643j1.pdf]

## **First 4,7-oxygenated 1,10-phenanthroline-2,9-diamides: synthesis, tautomerism and complexation with REE nitrates**

**Nane A. Avagyan,<sup>a</sup> Pavel S. Lempert,<sup>a</sup> Vitaly A. Roznyatovsky,<sup>a</sup> Alexei D. Averin,<sup>a</sup> Alexei A. Yakushev,<sup>a</sup> Konstantin A. Lyssenko,<sup>a</sup> Pavel D. Perfilyev,<sup>a</sup> Ksenia L. Isakovskaya,<sup>b</sup> Svetlana A. Aksenova,<sup>b,c</sup> Yulia V. Nelyubina,<sup>b</sup> Mikhail F. Vokuev,<sup>a</sup> Igor A. Rodin,<sup>a</sup> Igor P. Gloriov,<sup>a</sup> Yuri A. Ustynyuk,<sup>a</sup> Valentine G. Nenajdenko<sup>a\*</sup>**

<sup>a</sup> Department of Chemistry, Lomonosov Moscow State University, Leninskie gory 1 bld. 3, Moscow, Russia; nenajdenko@gmail.com (V.N.)

<sup>b</sup> A.N. Nesmeyanov Institute of Organoelement Compounds, Russian Academy of Sciences, 119334, Moscow, Russia

<sup>c</sup> Moscow Institute of Physics and Technology, National Research University, Institutskiy per. 9, Dolgoprudny, 141700 Moscow Region, Russia

\* Correspondence to: nenajdenko@gmail.com (V.N.)

### **Supplementary Materials**

#### **Table of contents**

|                                                     |         |
|-----------------------------------------------------|---------|
| 1. NMR and IR spectra of synthesized compounds..... | S2-S33  |
| 2. NMR spectra of hydrolysis experiments.....       | S34-S35 |
| 3. NMR titration.....                               | S36-S53 |
| 4. UV-vis titration.....                            | S54     |
| 5. Theoretical computations.....                    | S55-S57 |

# 1. NMR and IR spectra of synthesized compounds

**$N^2,N^2,N^9,N^9$ -tetrabutyl-7-chloro-4-oxo-1,4-dihydro-1,10-phenanthroline-2,9-dicarboxamide (4a)**

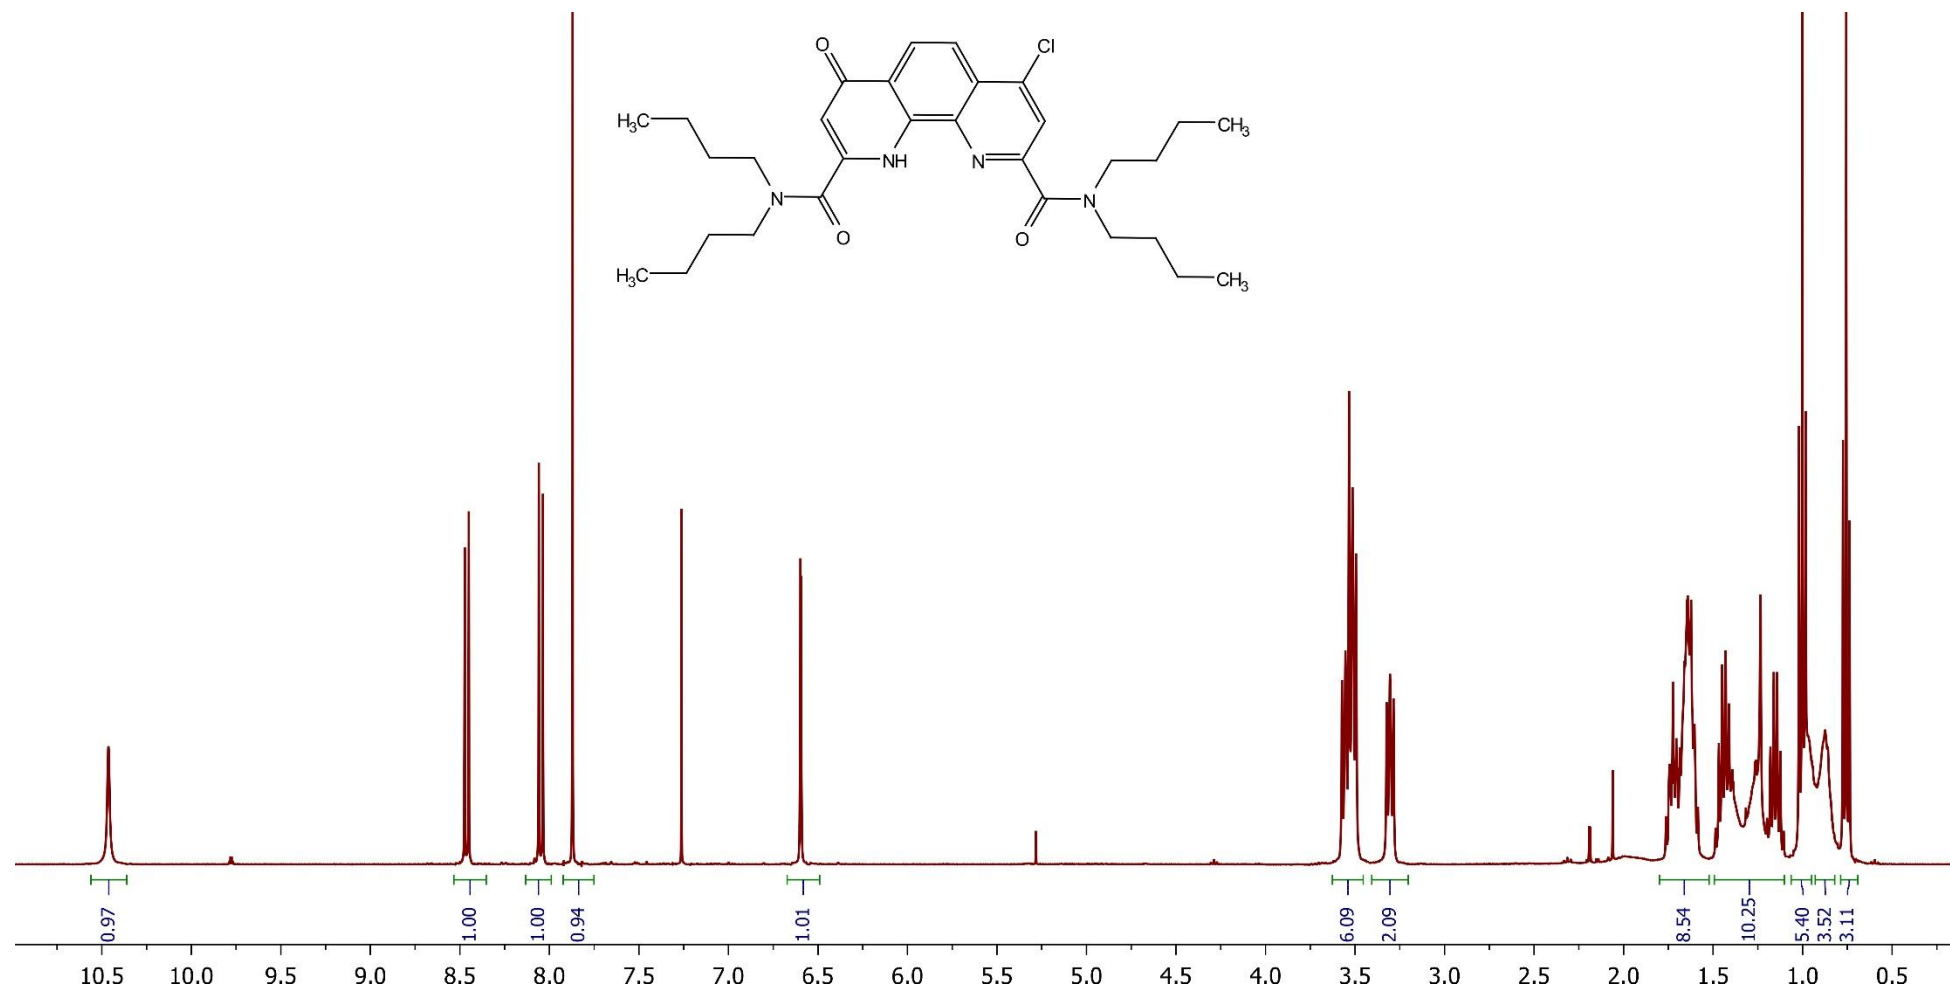

**Figure S1.**  $^1\text{H}$  NMR spectrum in  $\text{CDCl}_3$  at  $25^\circ\text{C}$

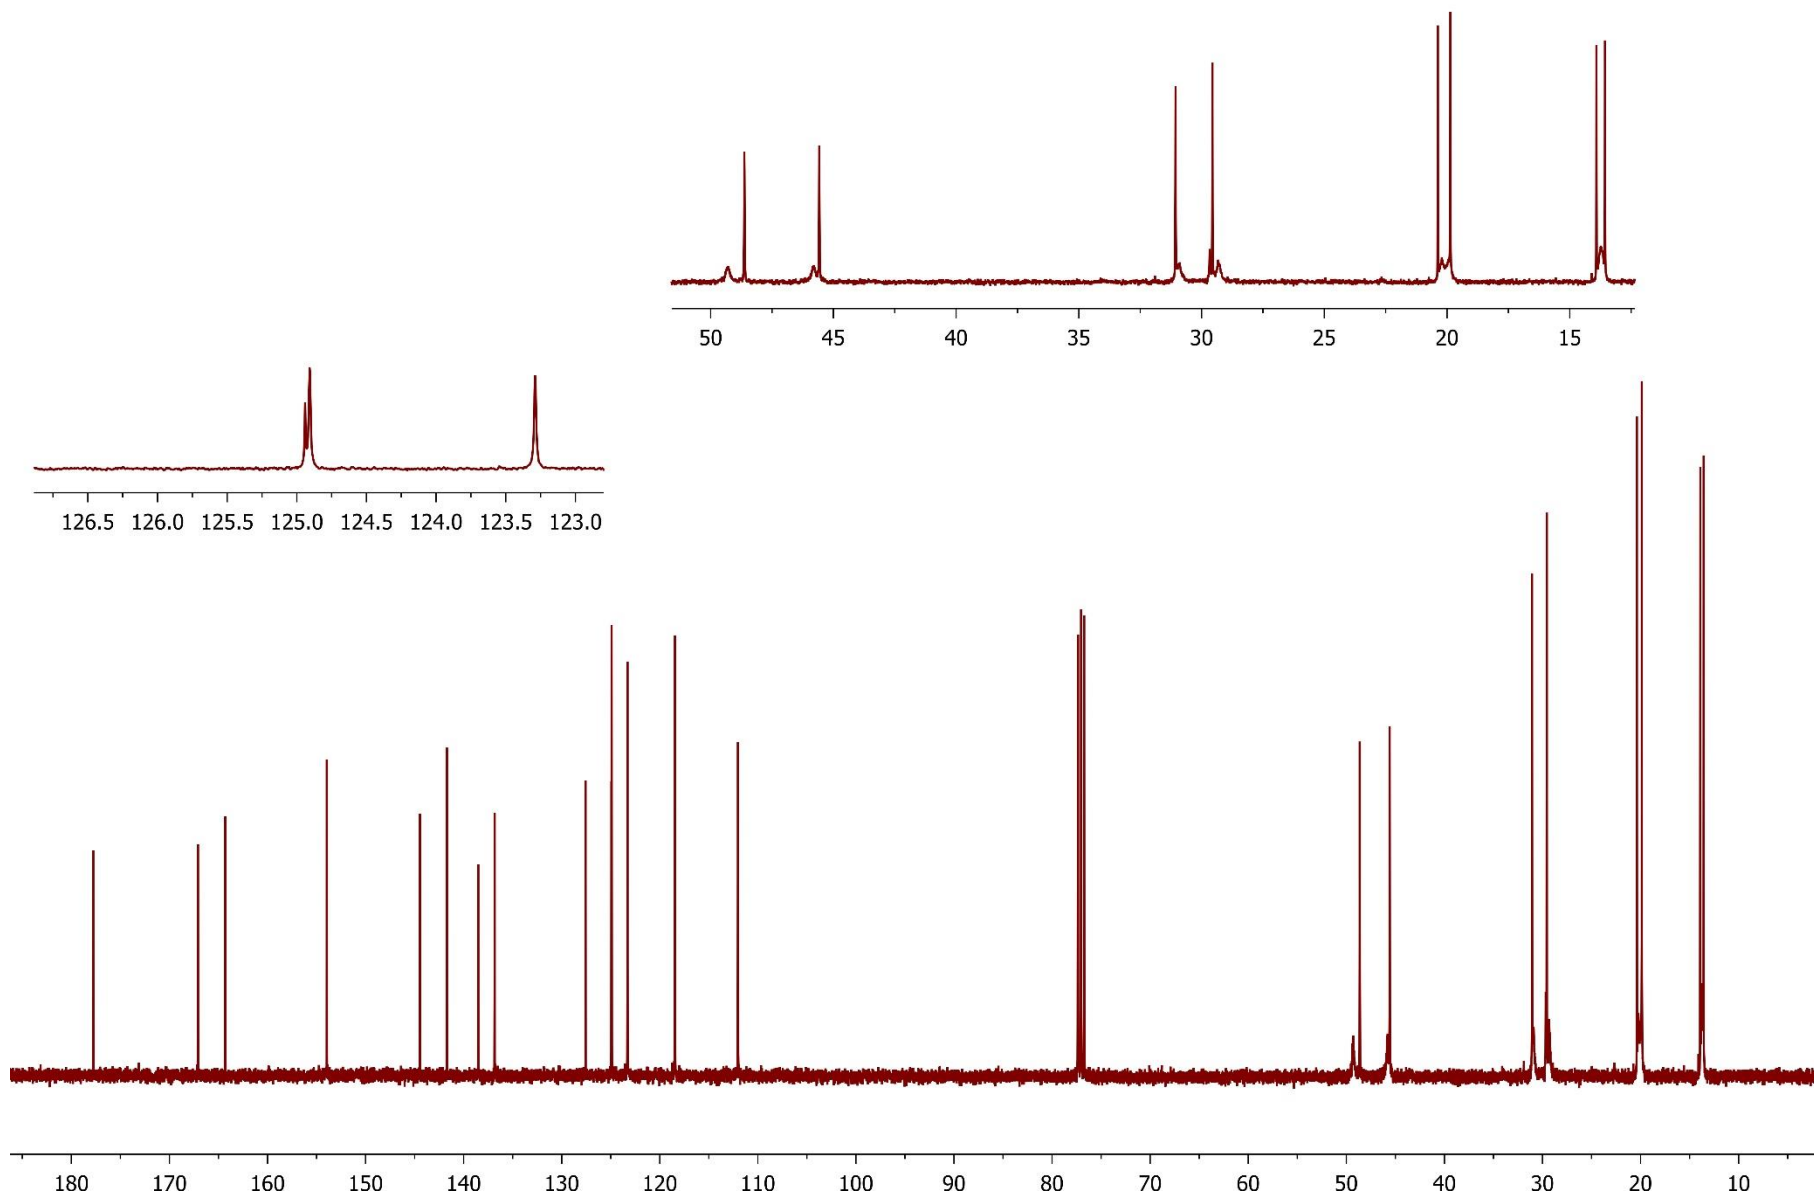

Figure S2.  $^{13}\text{C}$  NMR spectrum in  $\text{CDCl}_3$  at  $25^\circ\text{C}$

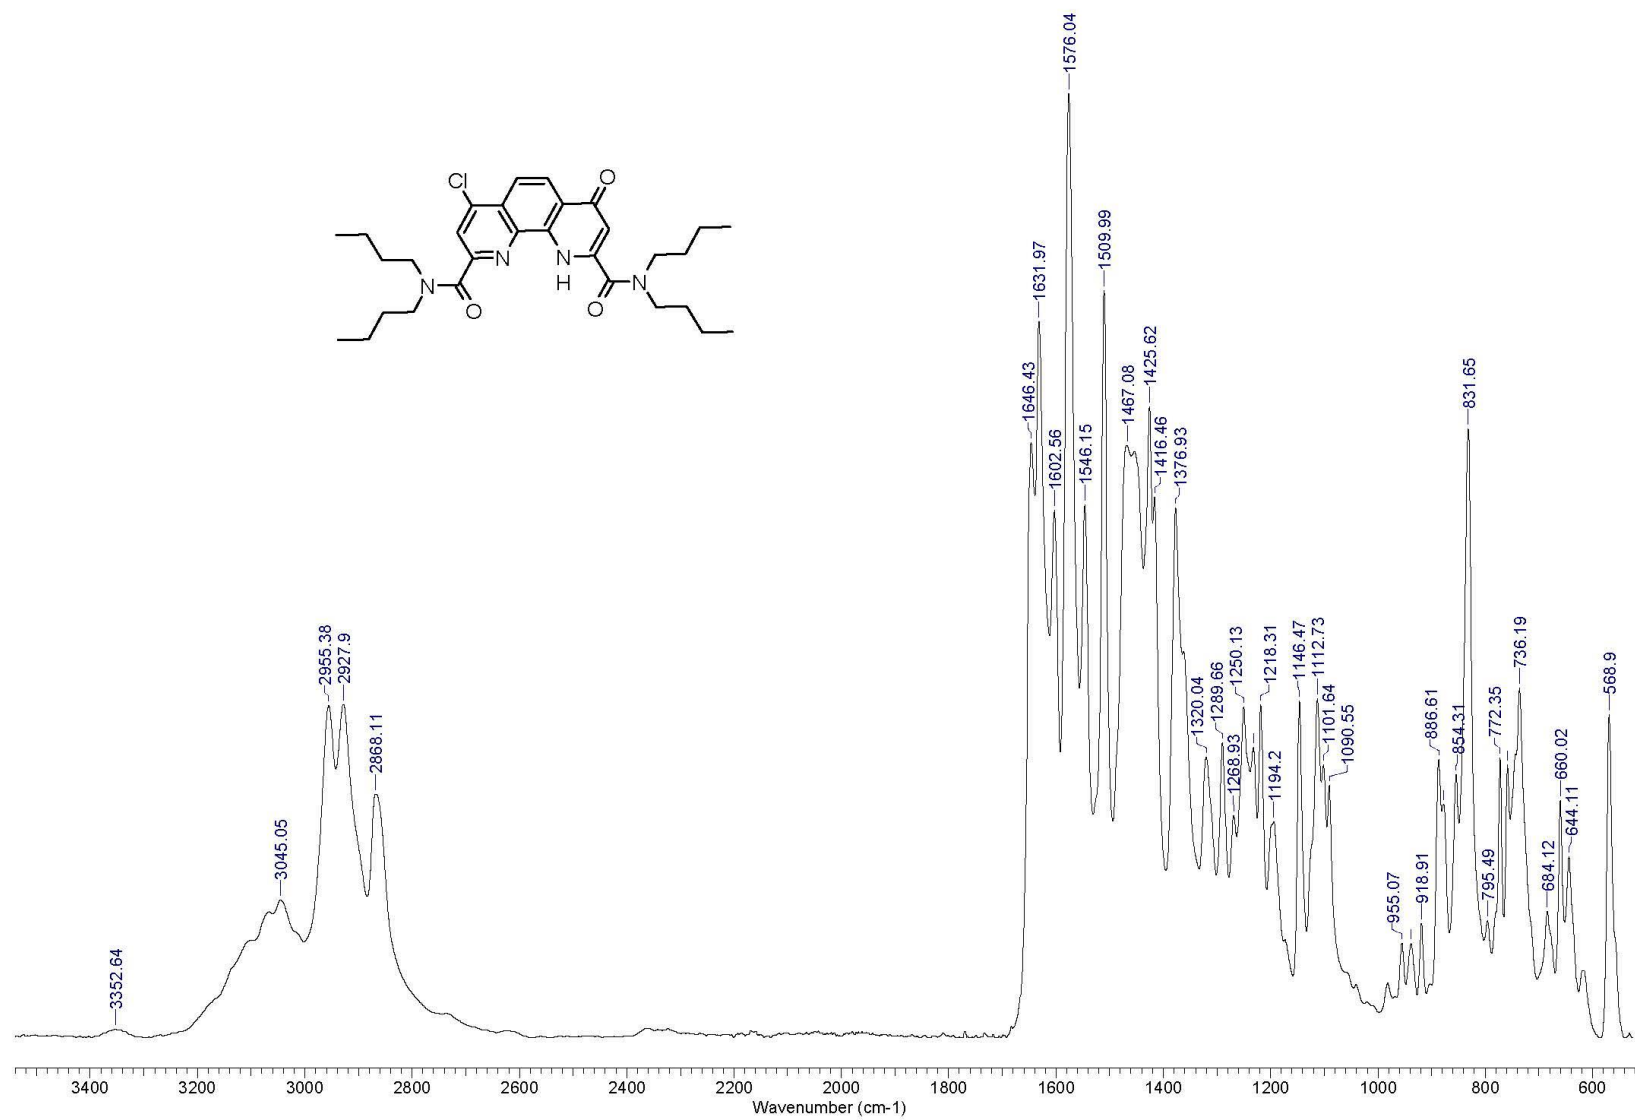

**Figure S3.** Solid-state IR spectrum at 25°C

**N<sup>2</sup>,N<sup>9</sup>-bis(4-butylphenyl)-7-chloro-N<sup>2</sup>,N<sup>9</sup>-diethyl-4-oxo-1,4-dihydro-1,10-phenanthroline-2,9-dicarboxamide (4d)**

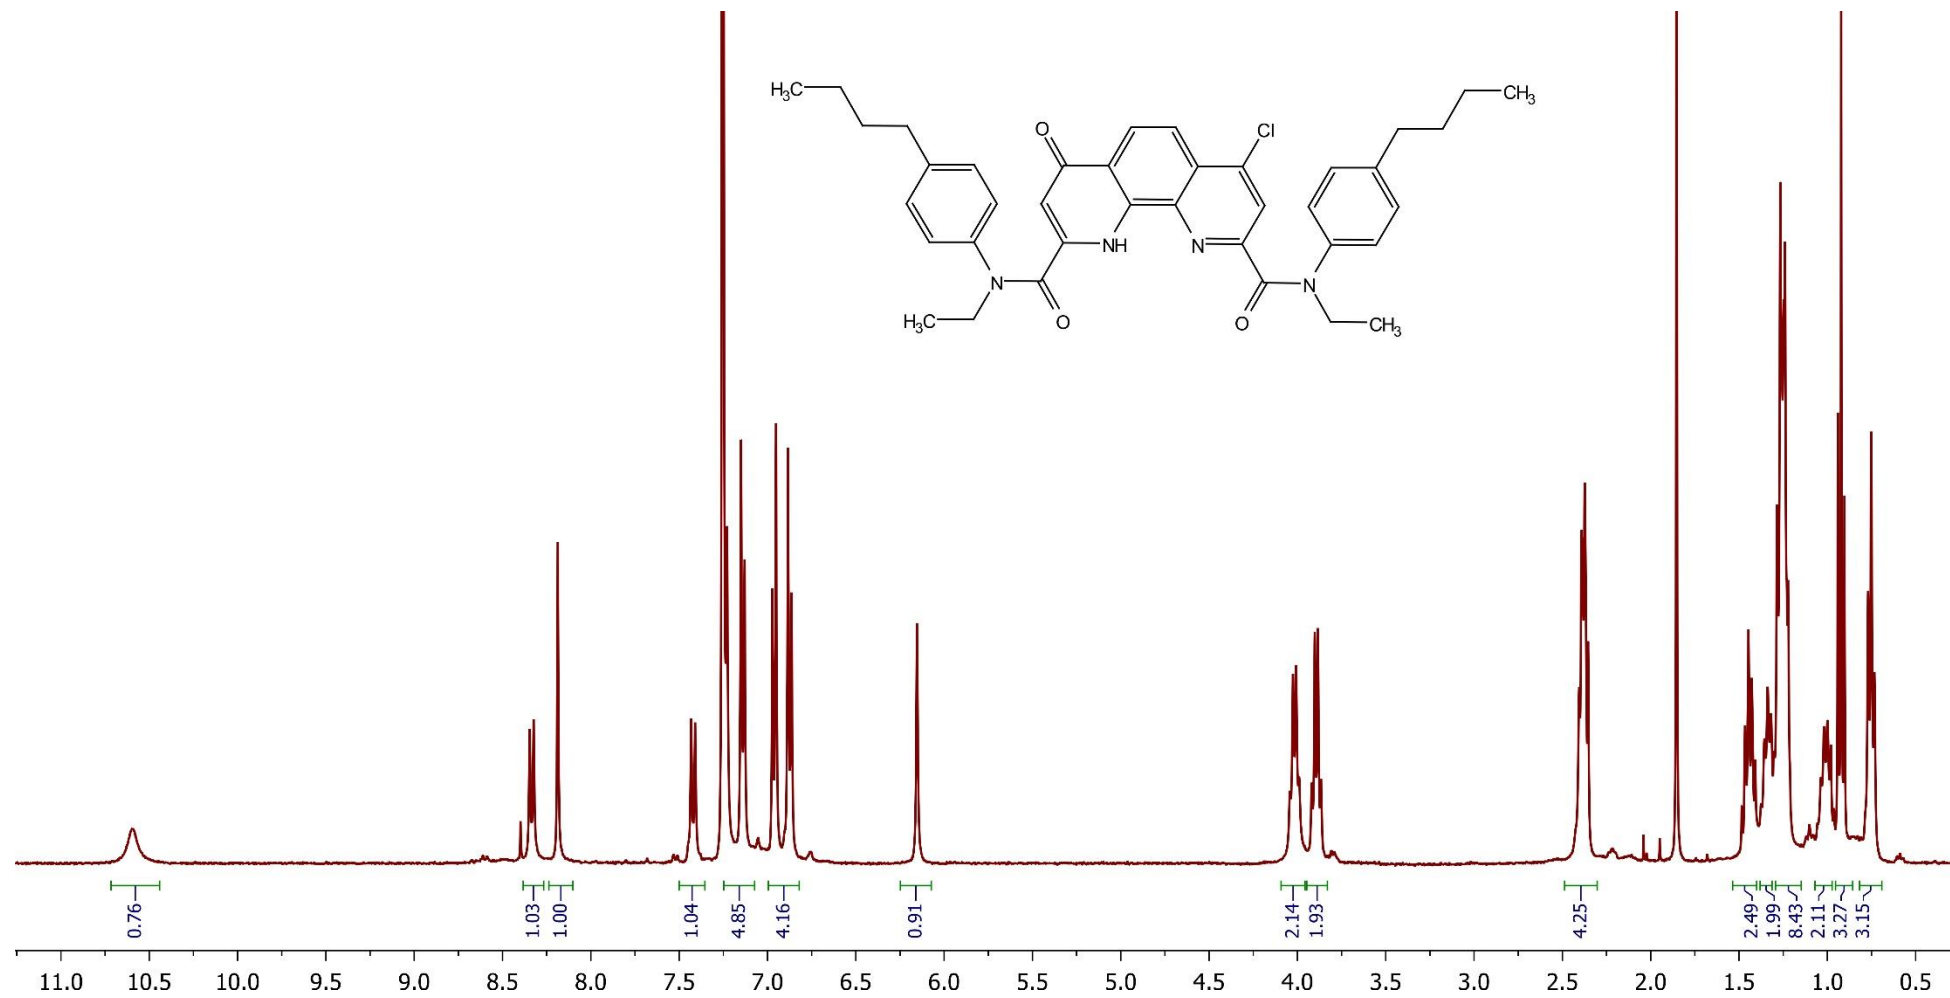

**Figure S4.** <sup>1</sup>H NMR spectrum in C<sub>6</sub>D<sub>6</sub> at 25°C

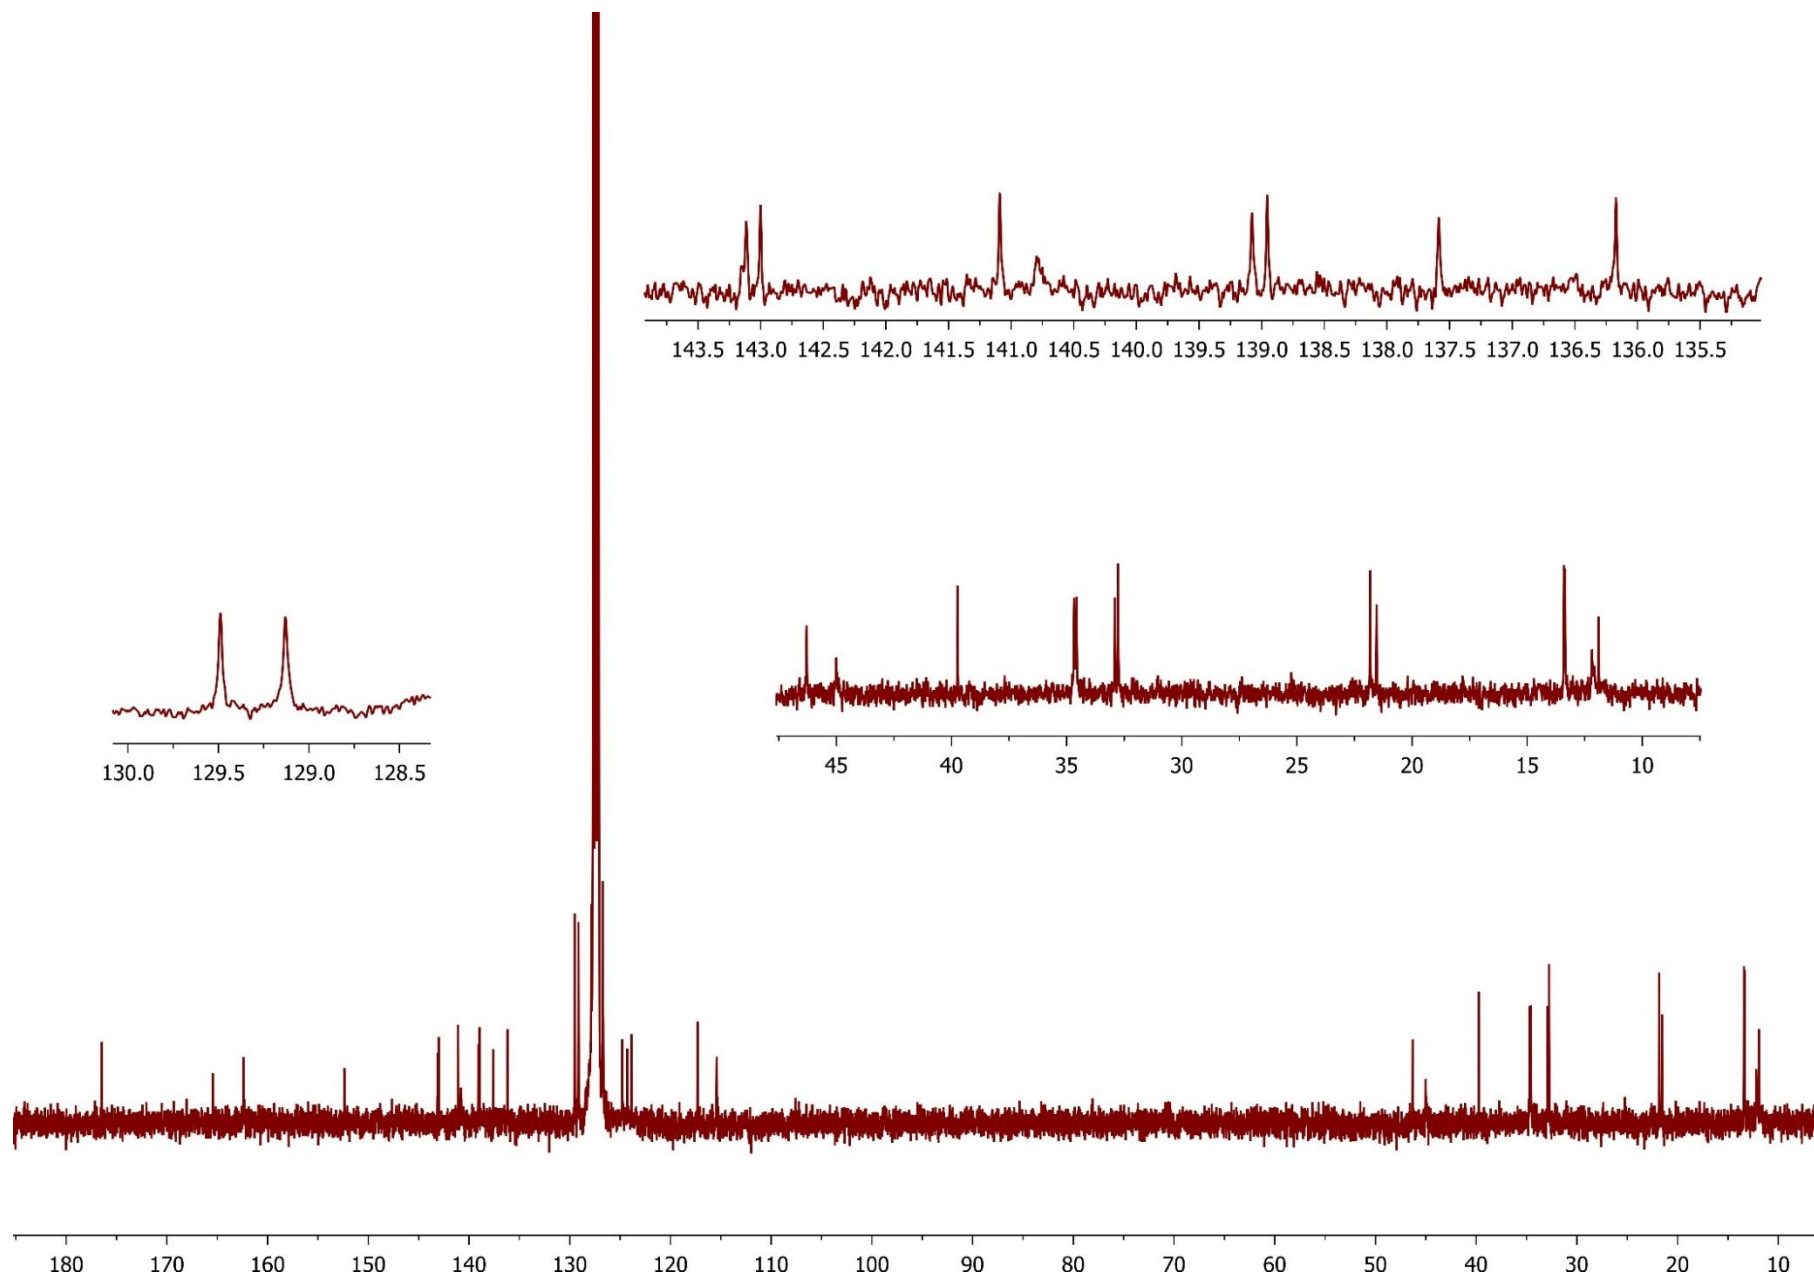

**Figure S5.**  $^{13}\text{C}$  NMR spectrum in  $\text{C}_6\text{D}_6$  at  $25^\circ\text{C}$

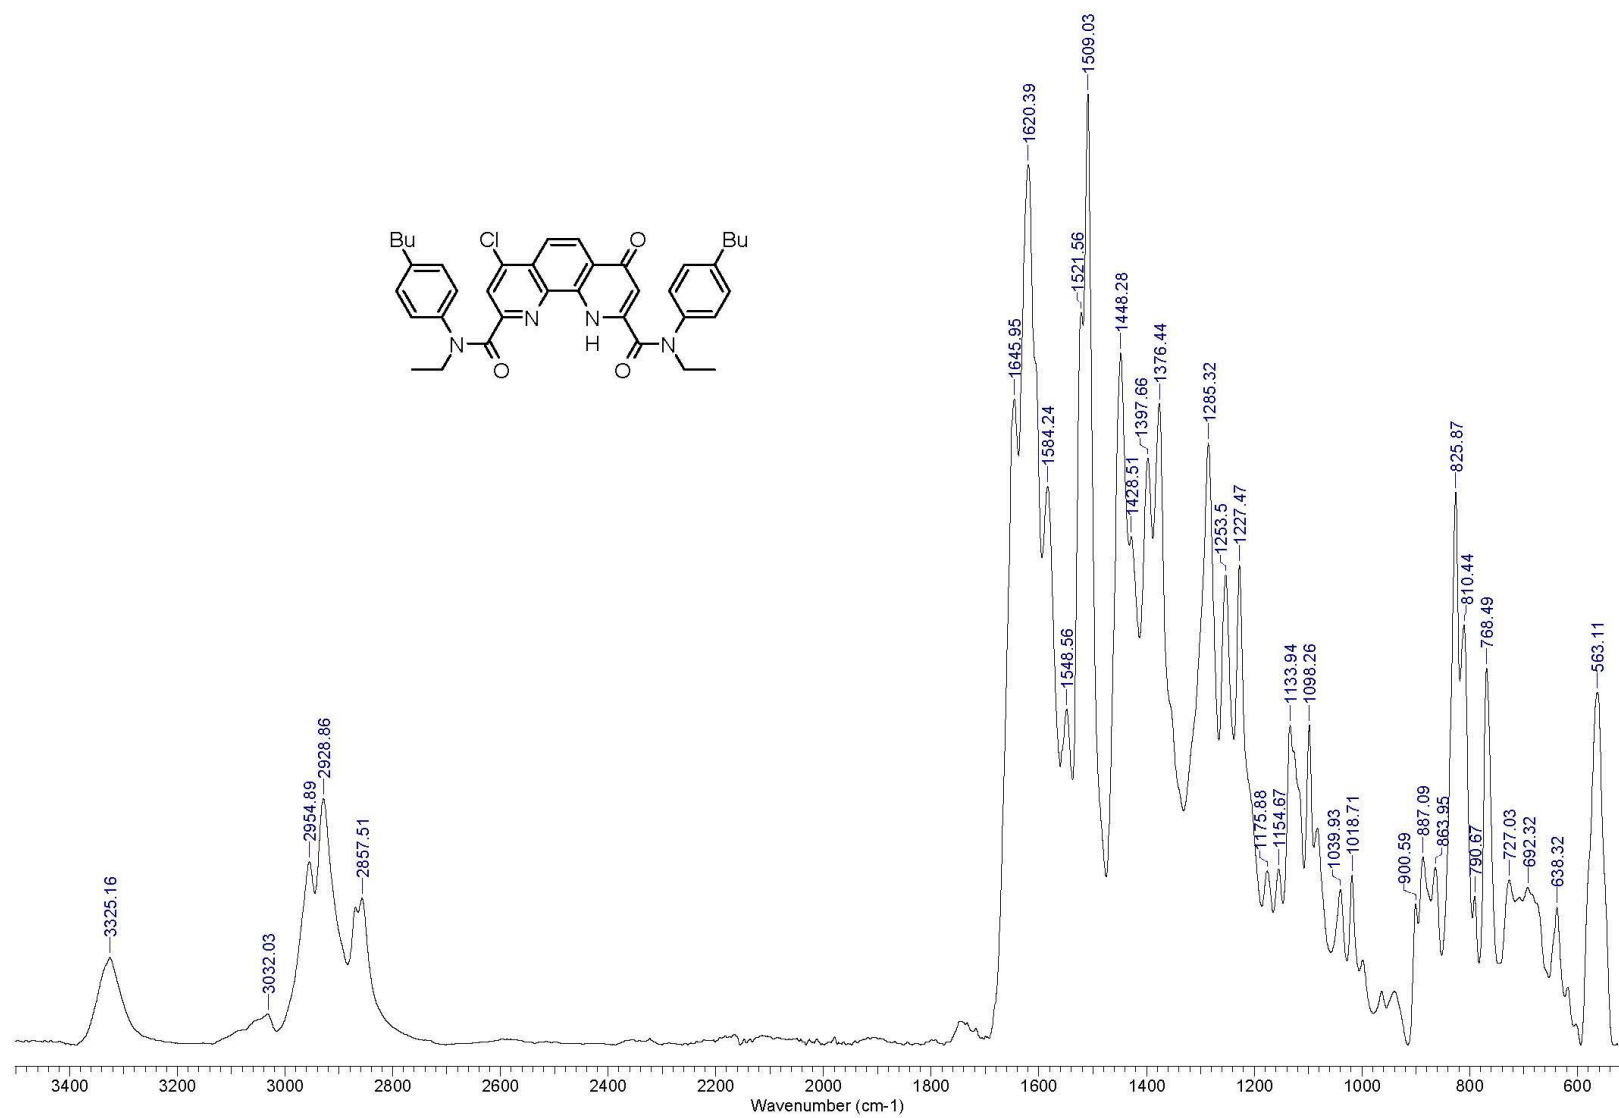

**Figure S6.** Solid-state IR spectrum at 25°C

**$N^2,N^2,N^9,N^9$ -tetrabutyl-7-hydroxy-4-oxo-1,4-dihydro-1,10-phenanthroline-2,9-dicarboxamide (5a)**

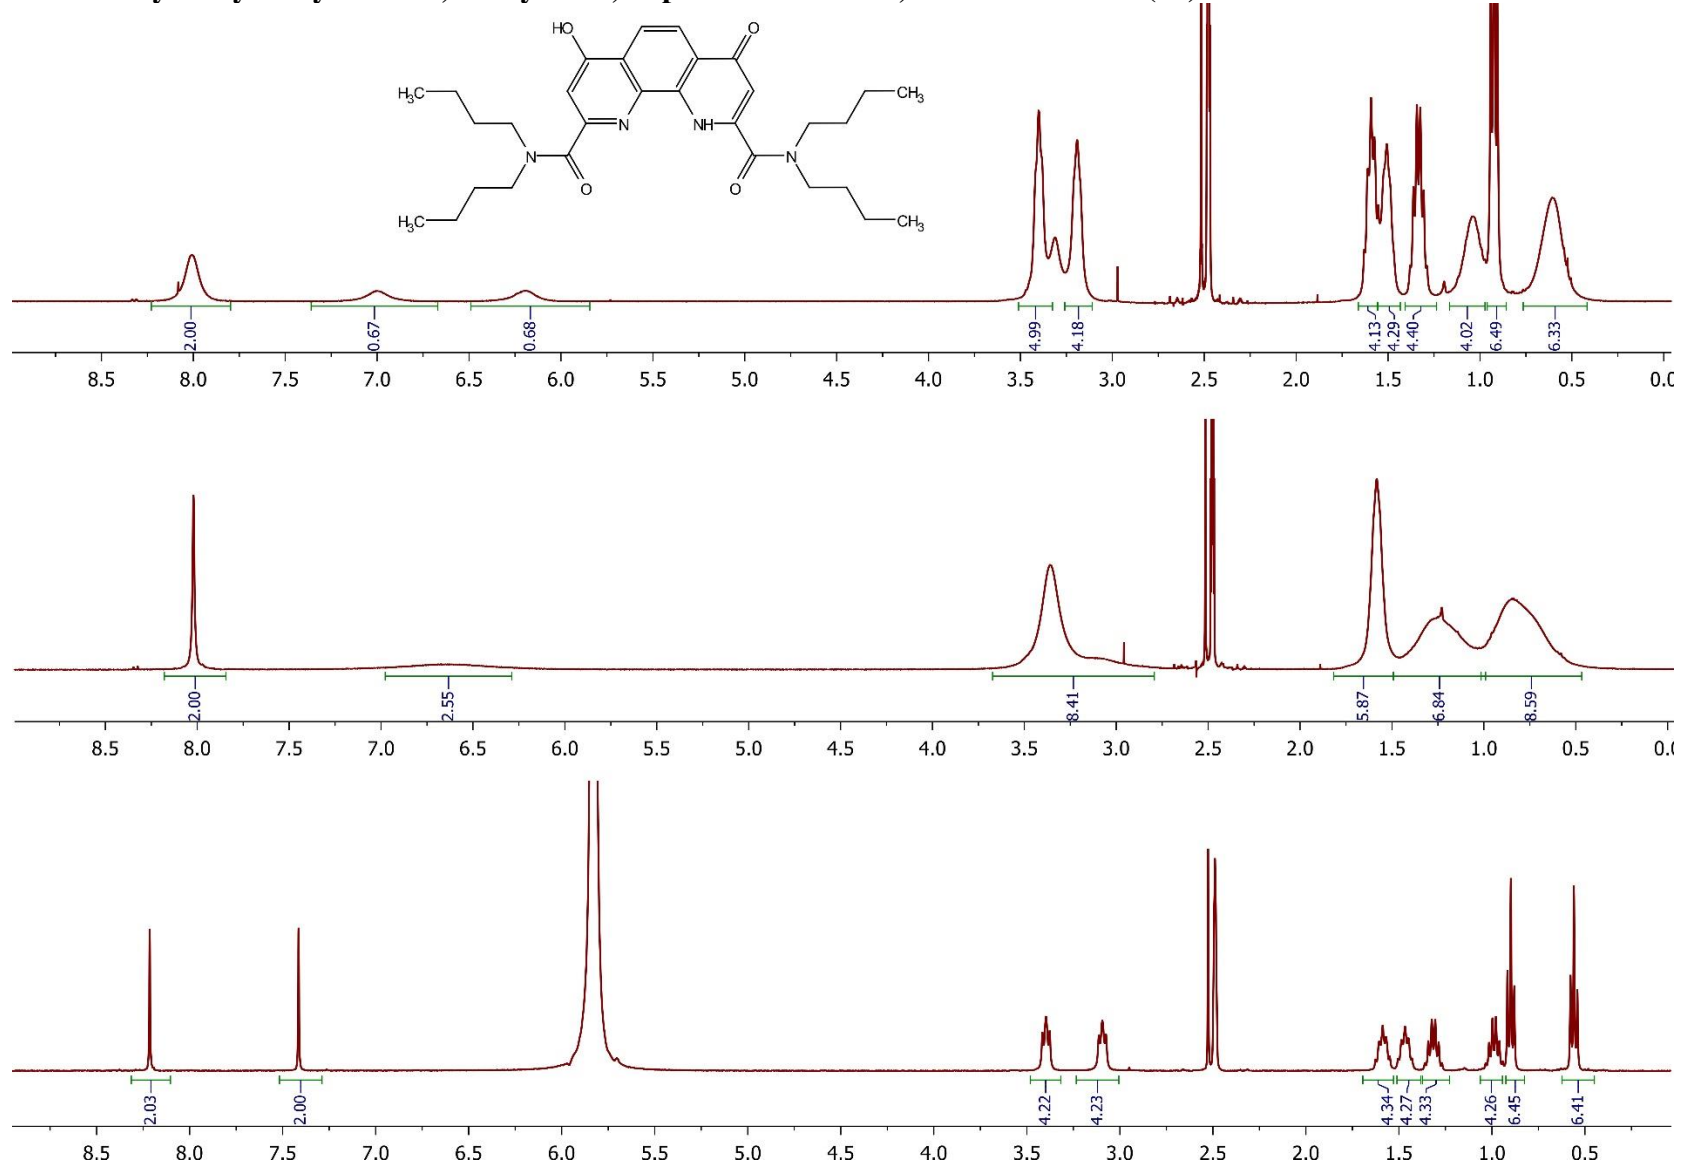

**Figure S7.**  $^1\text{H}$  NMR spectra in  $\text{DMSO-d}_6$  at (upper) 25°C, (middle) 60°C and (bottom) after adding  $\text{H}^+$



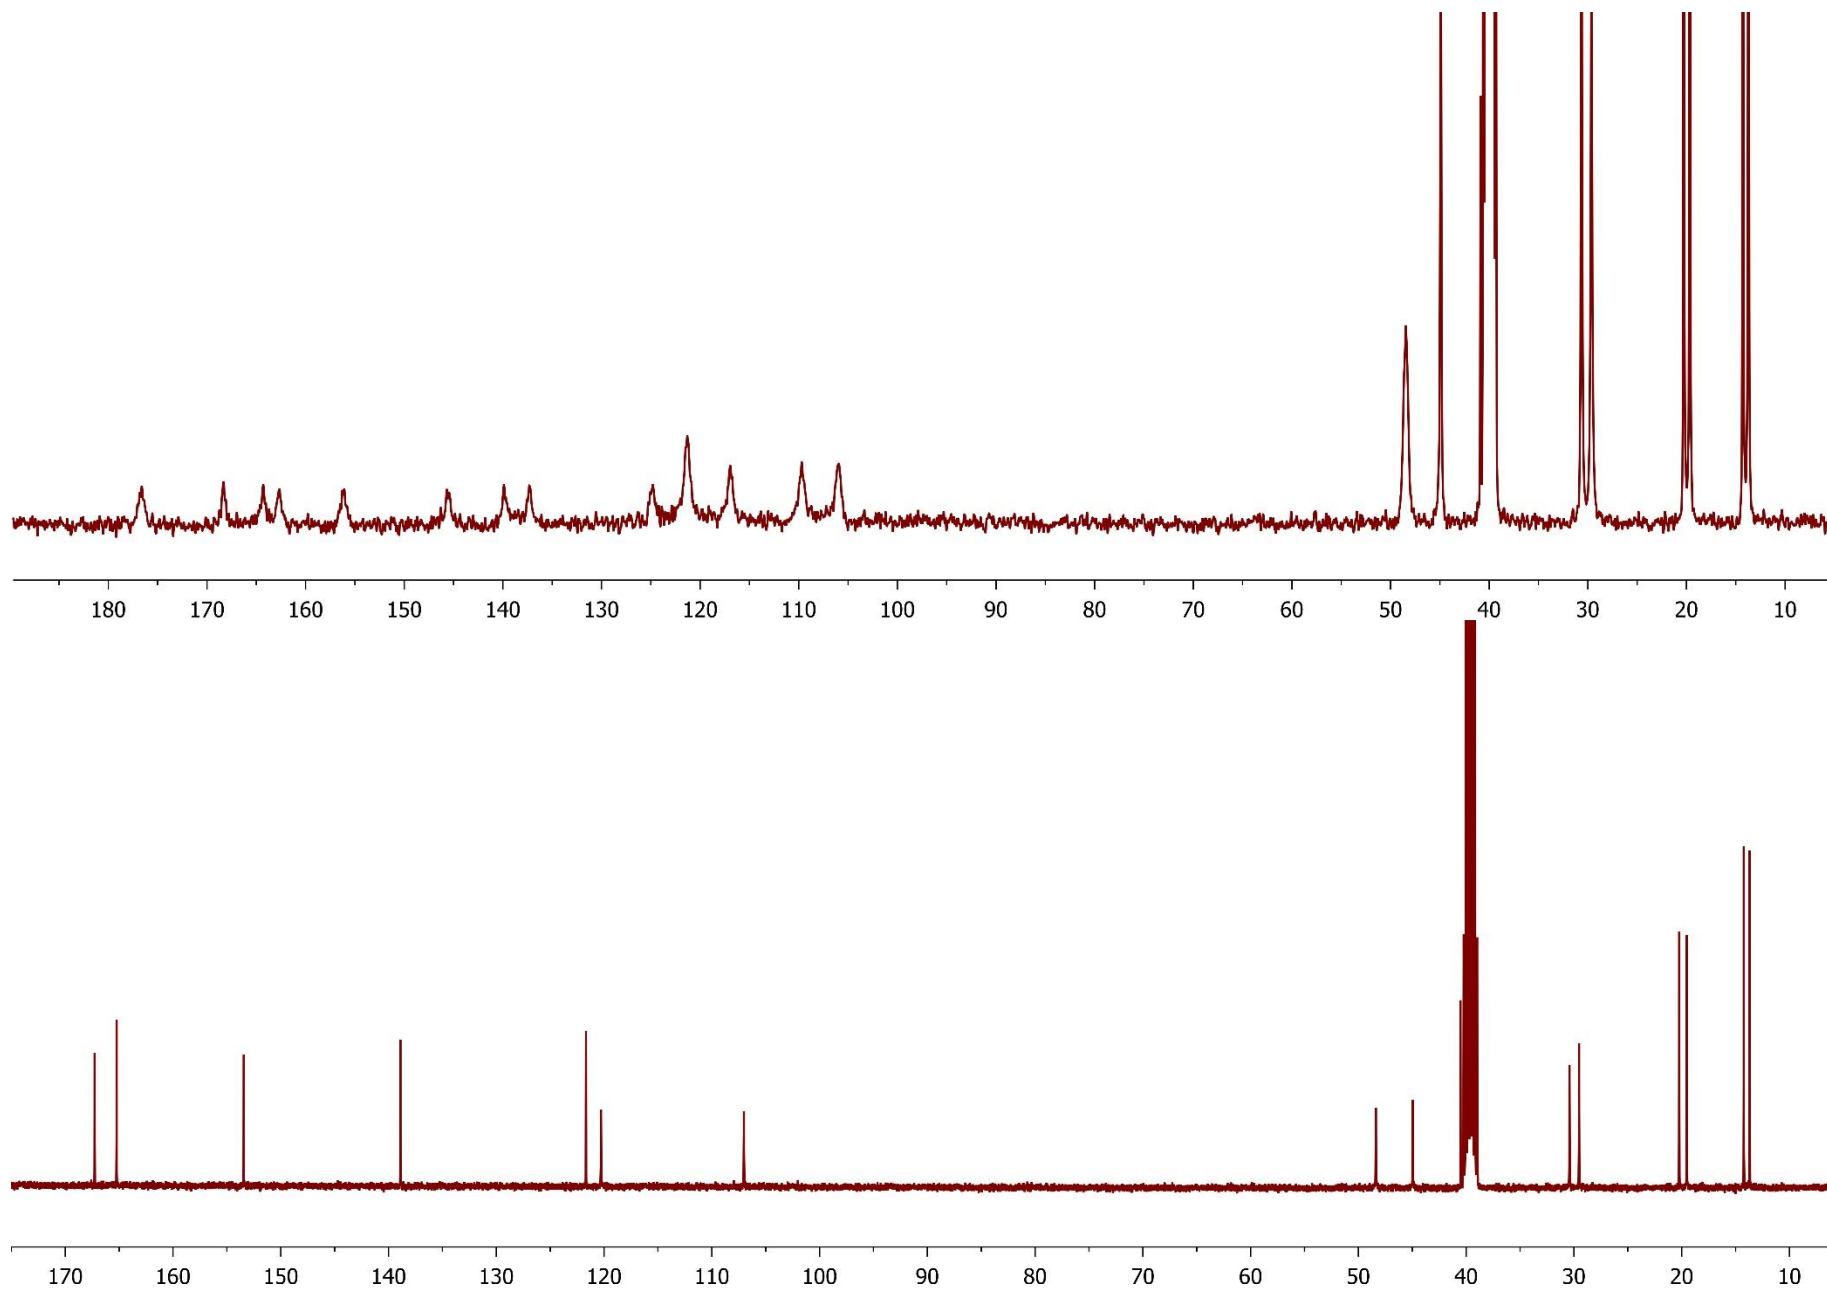

**Figure S8.**  $^{13}\text{C}$  NMR spectra in in  $\text{DMSO-d}_6$  at (upper) 25°C and (bottom) after adding  $\text{H}^+$

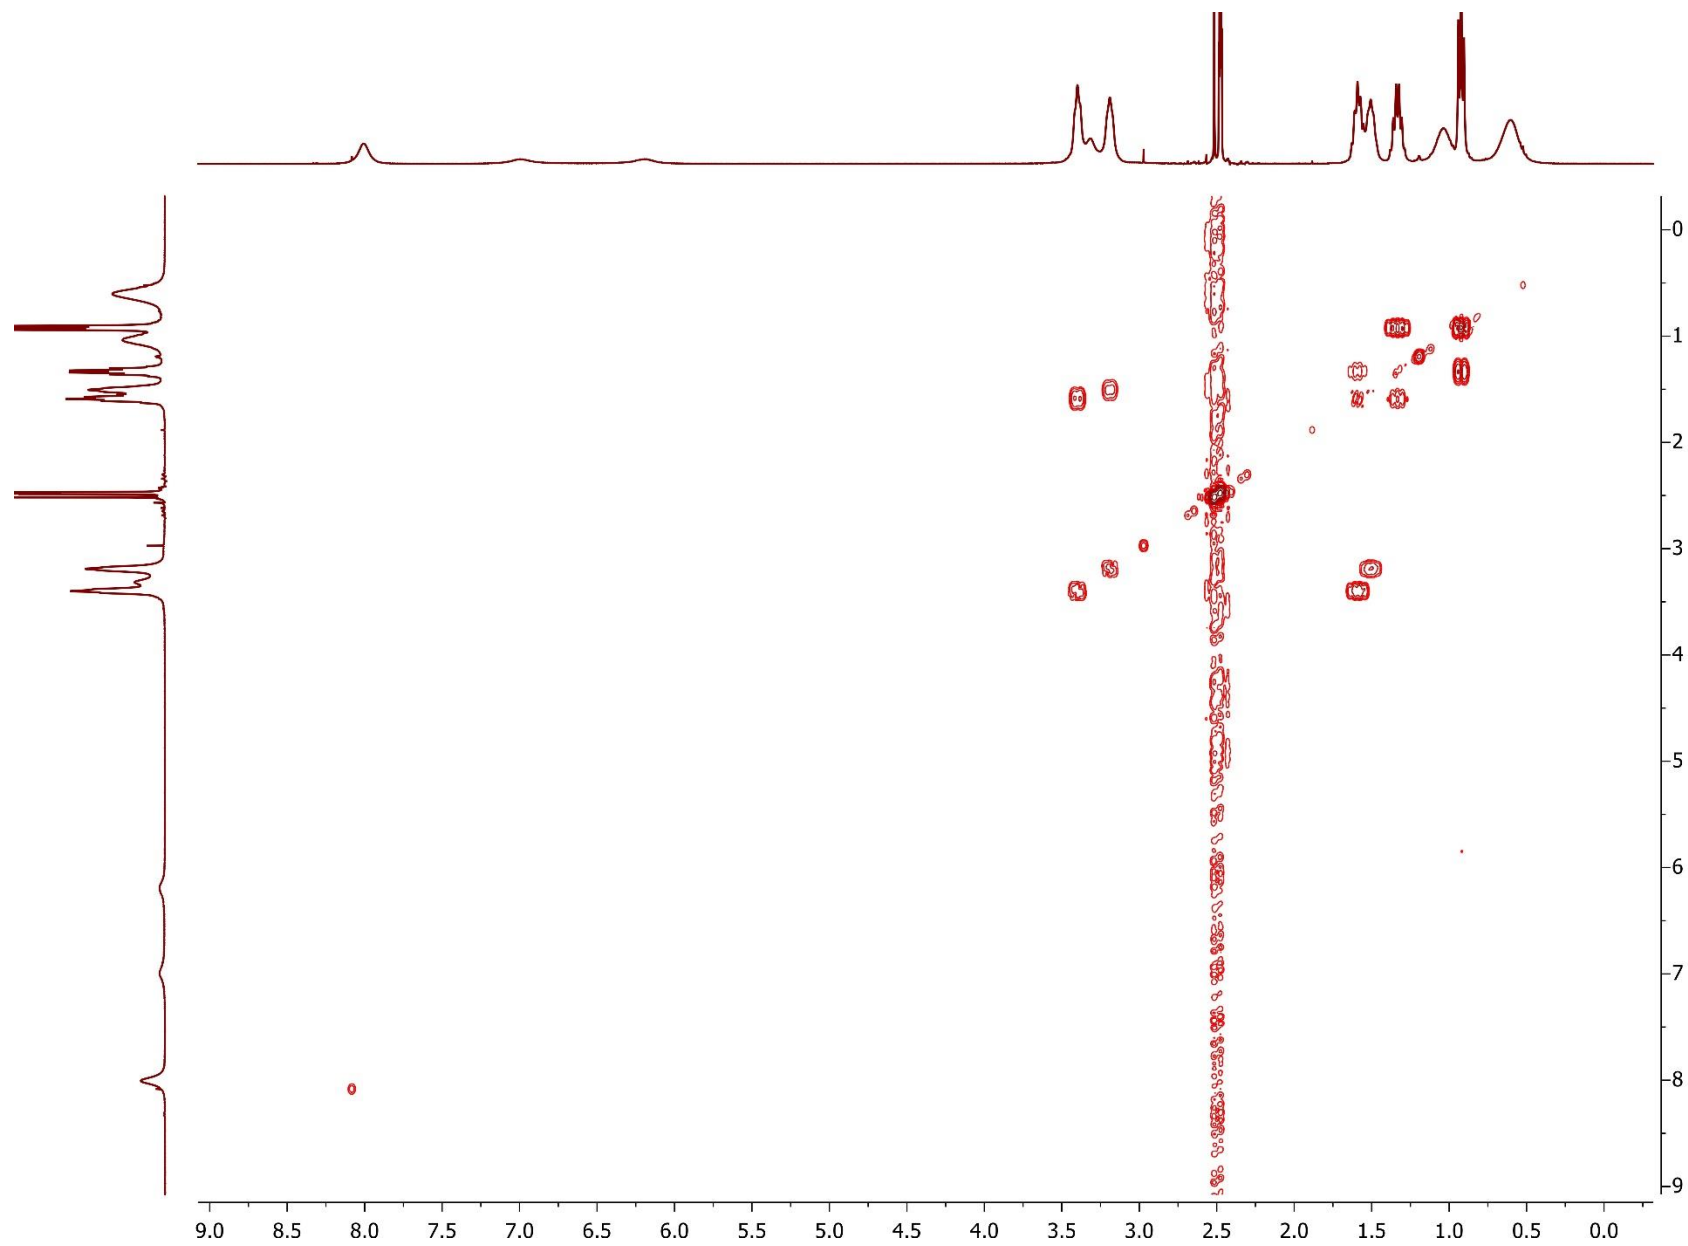

**Figure S9.**  $^1\text{H}/^1\text{H}$  COSY NMR spectrum in  $\text{DMSO-d}_6$  at  $25^\circ\text{C}$

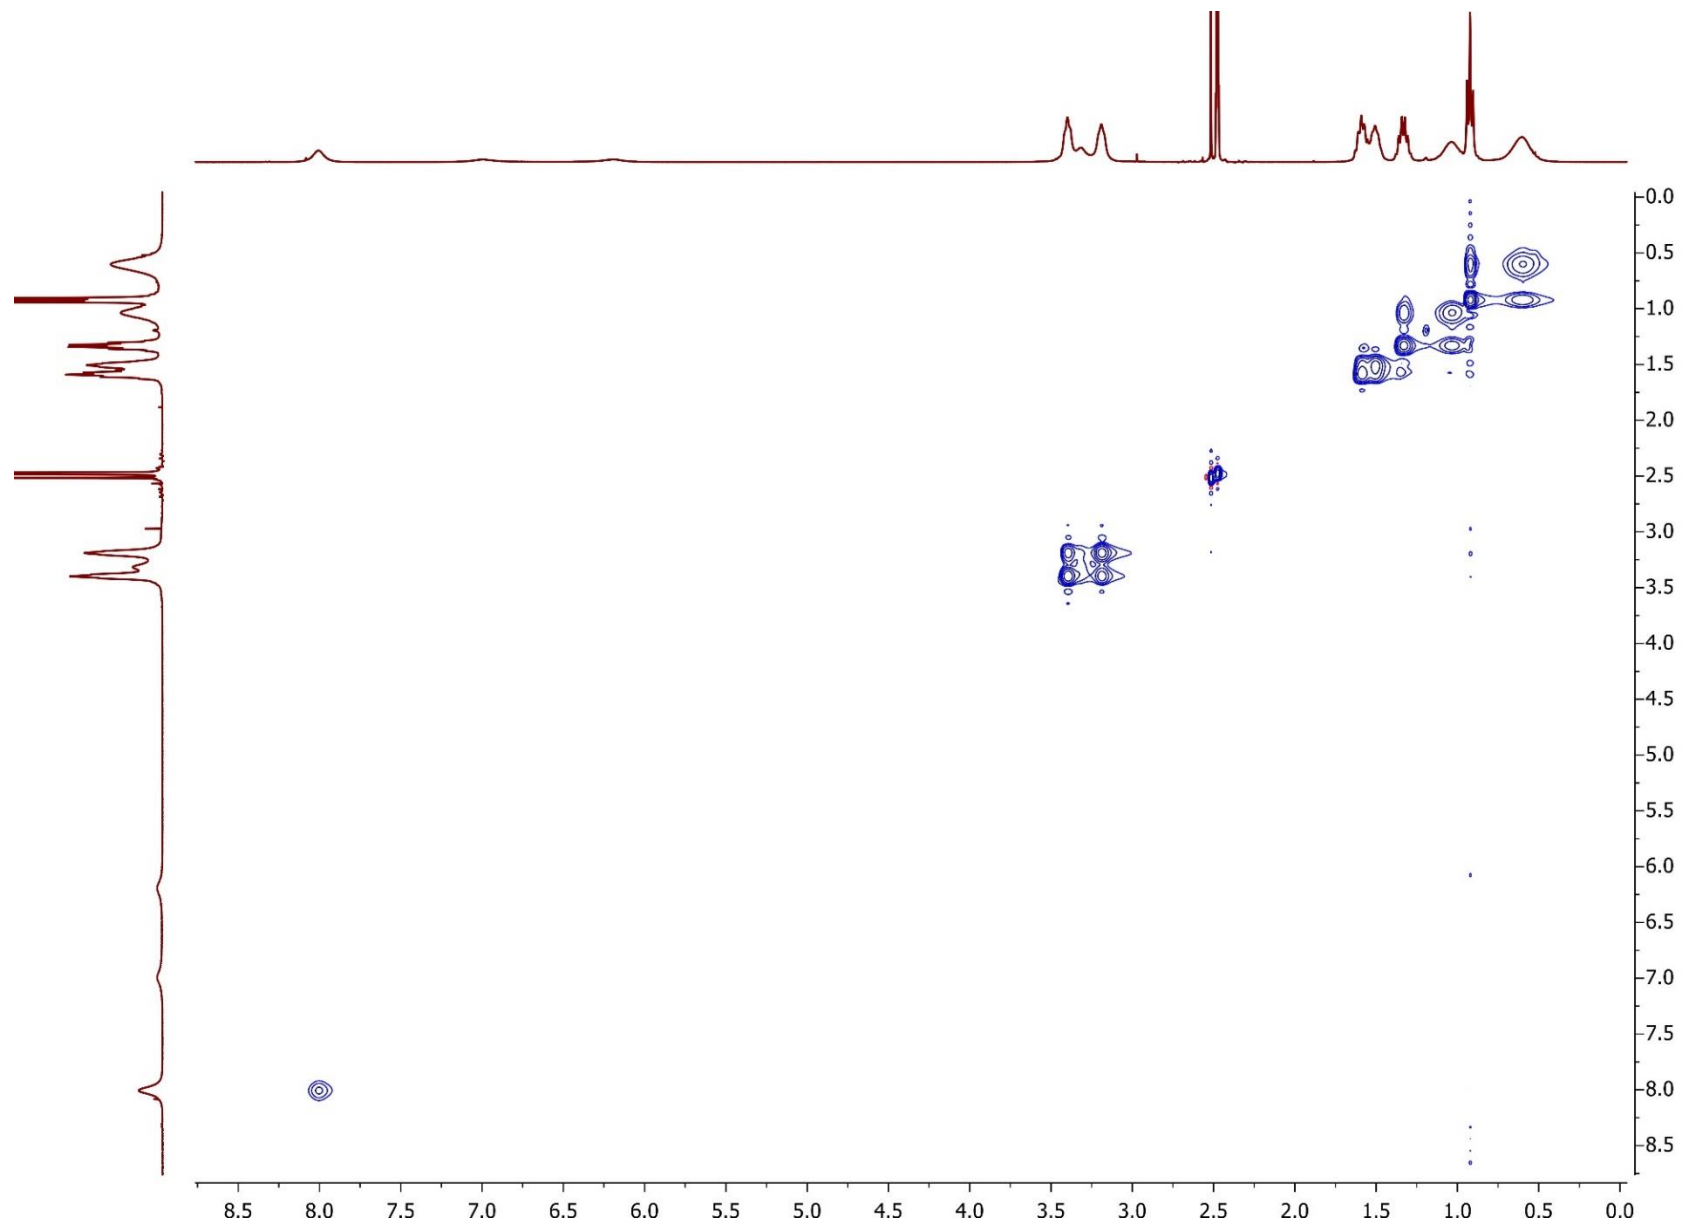

**Figure S10.**  $^1\text{H}/^1\text{H}$  NOESY NMR spectrum in DMSO- $d_6$  at 25°C

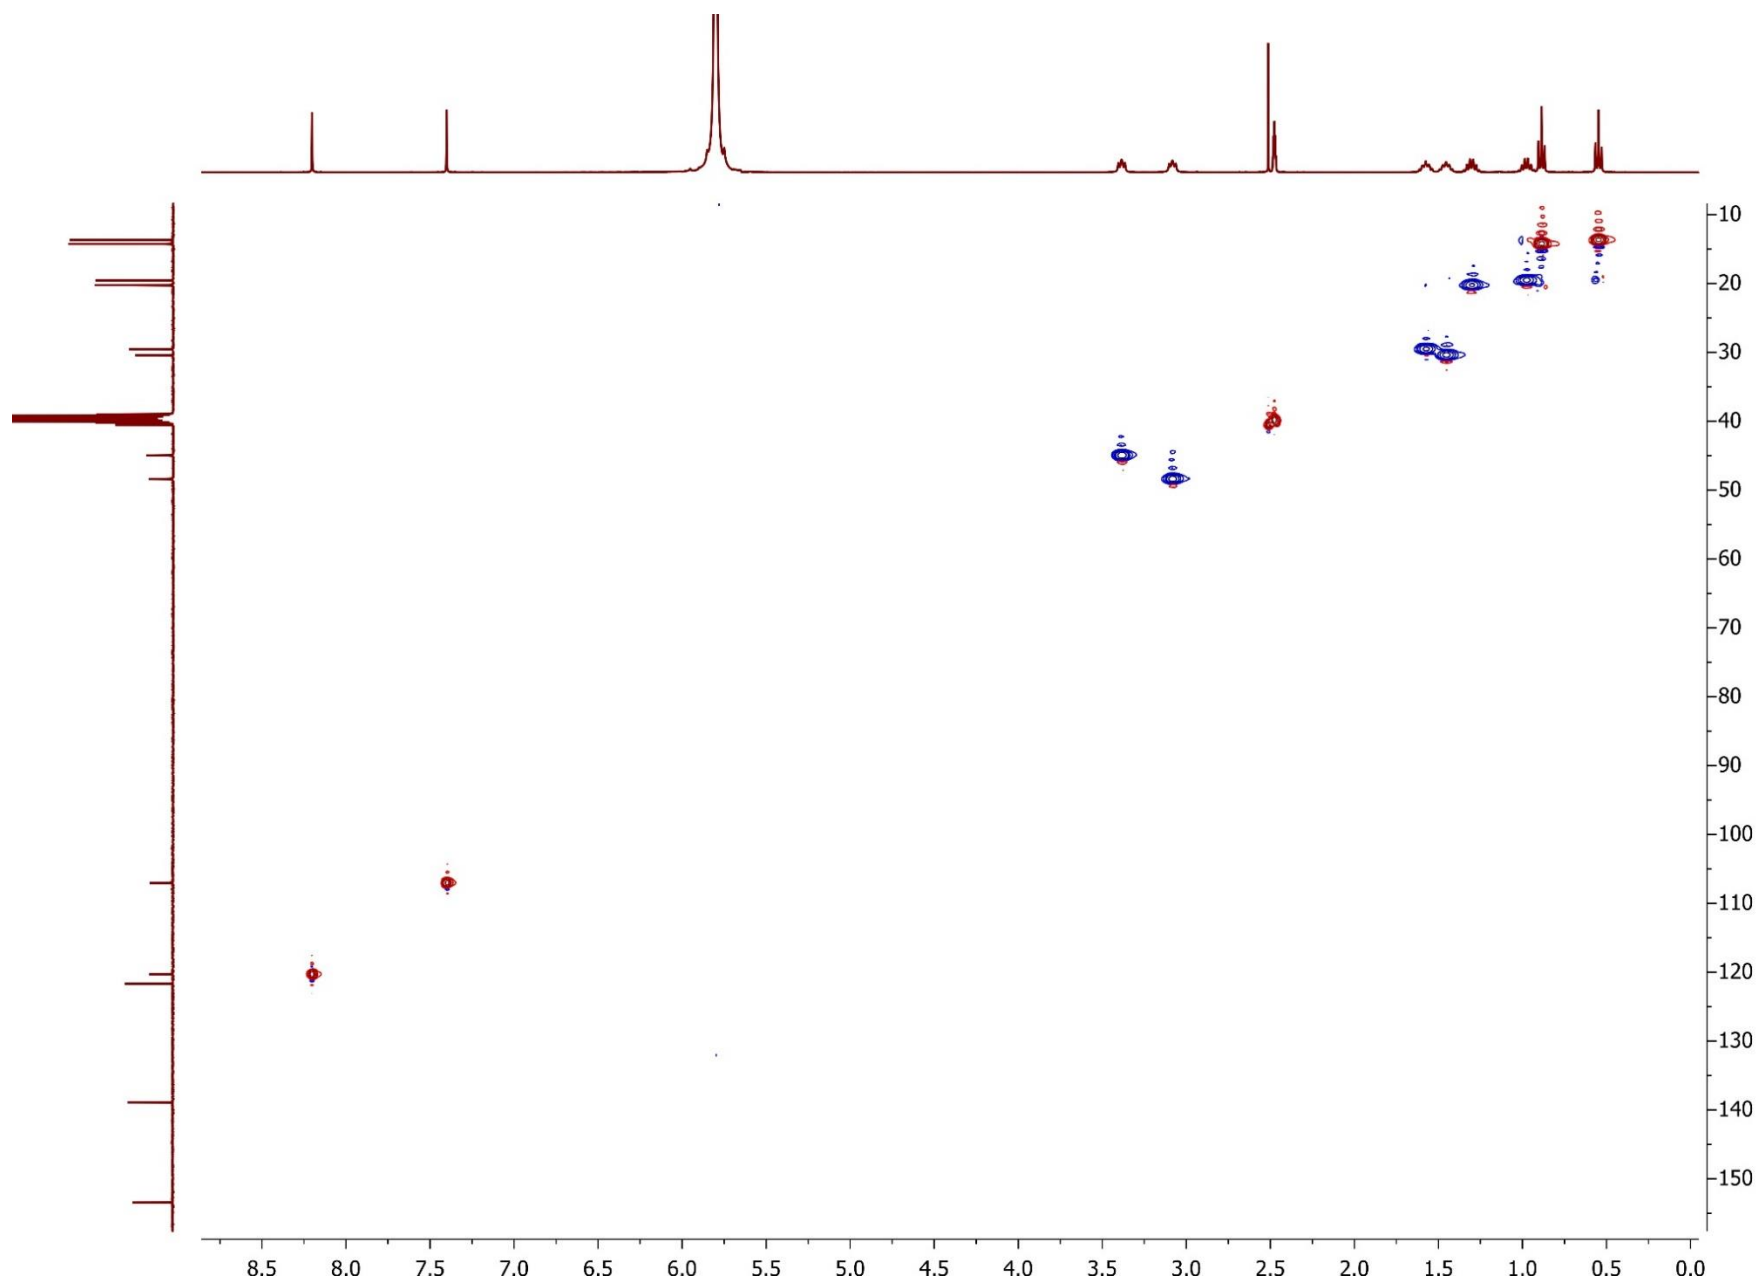

**Figure S11.**  $^1\text{H}/^{13}\text{C}$  HSQC NMR spectrum in  $\text{DMSO-d}_6$  after adding  $\text{H}^+$

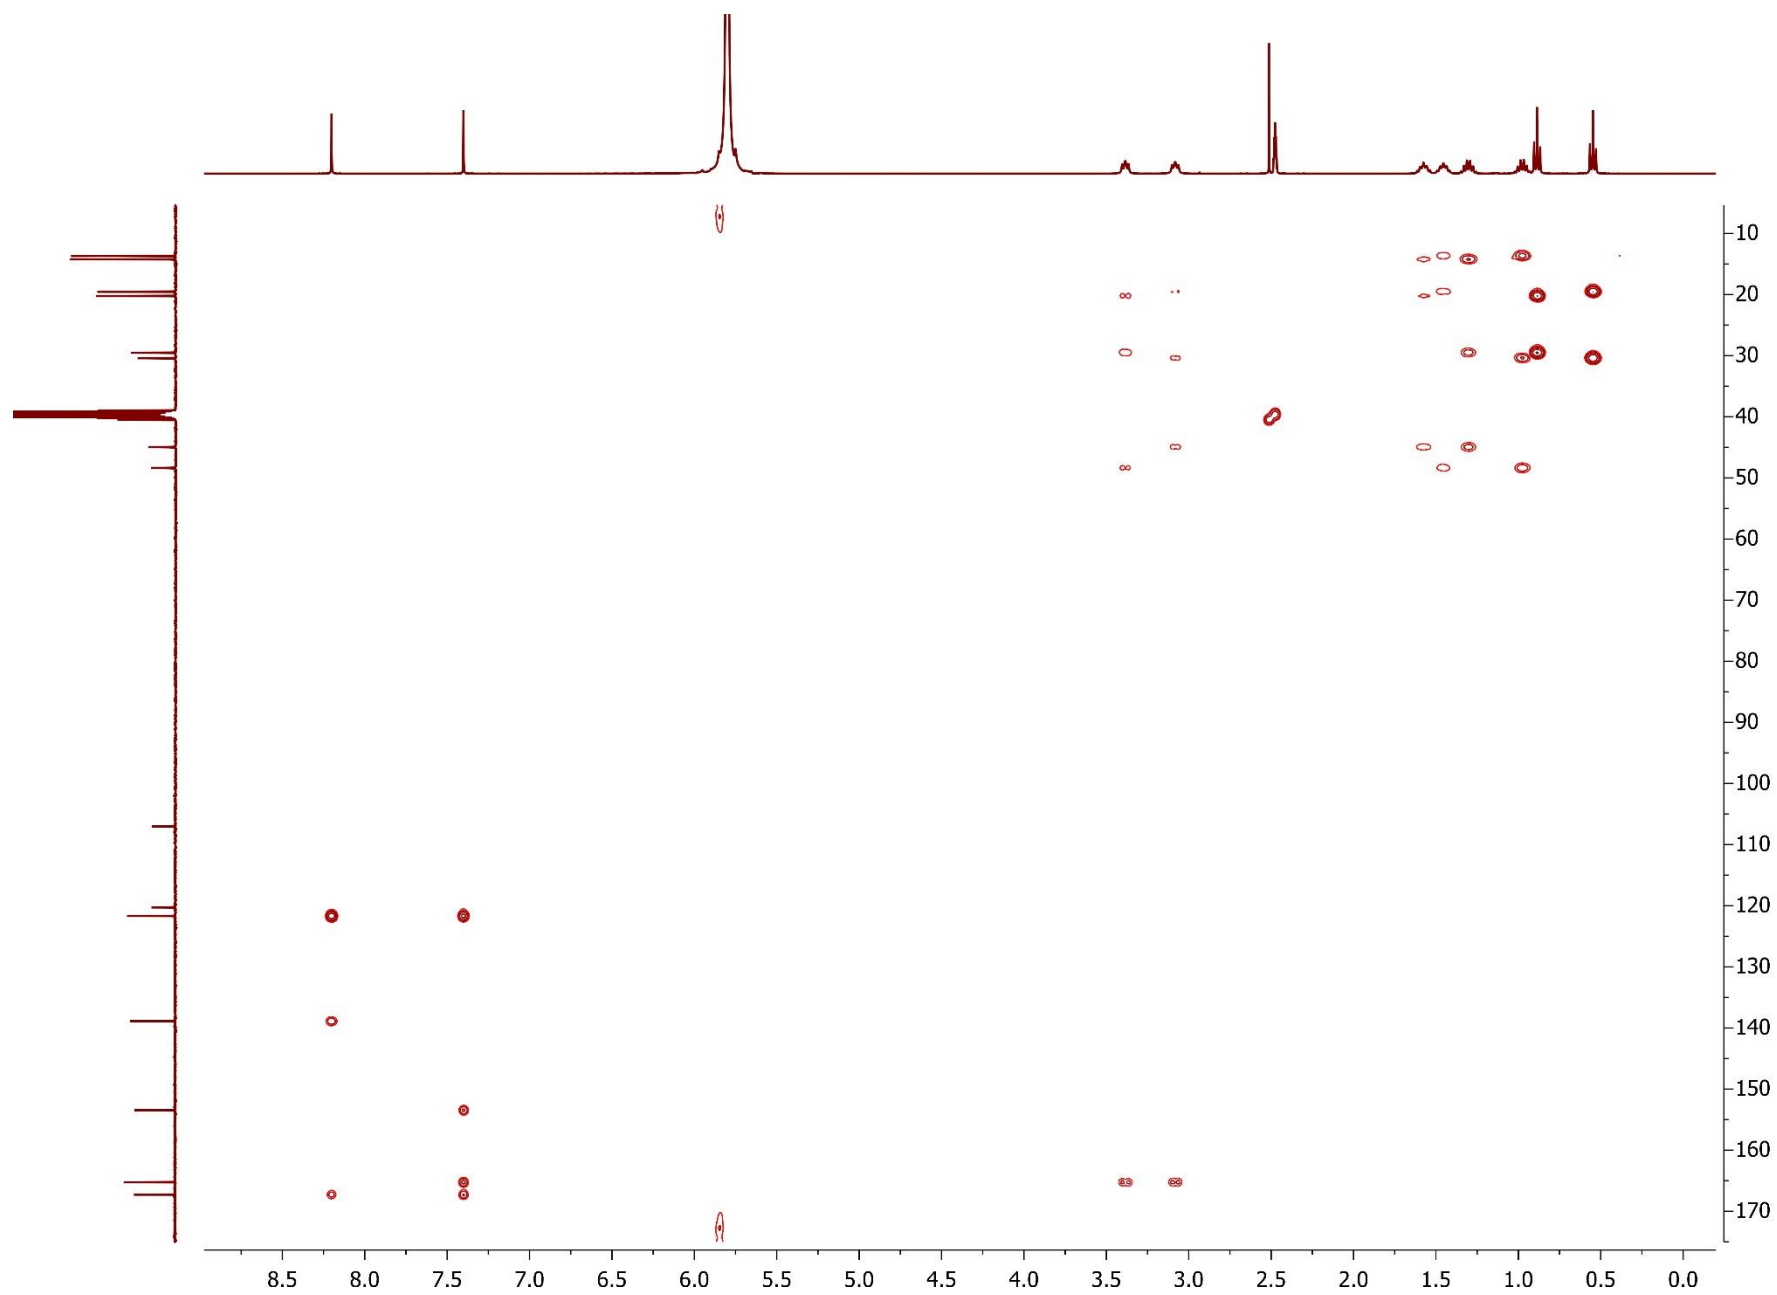

**Figure S12.**  $^1\text{H}/^{13}\text{C}$  HMBC NMR spectrum in DMSO- $\text{d}_6$  after adding  $\text{H}^+$

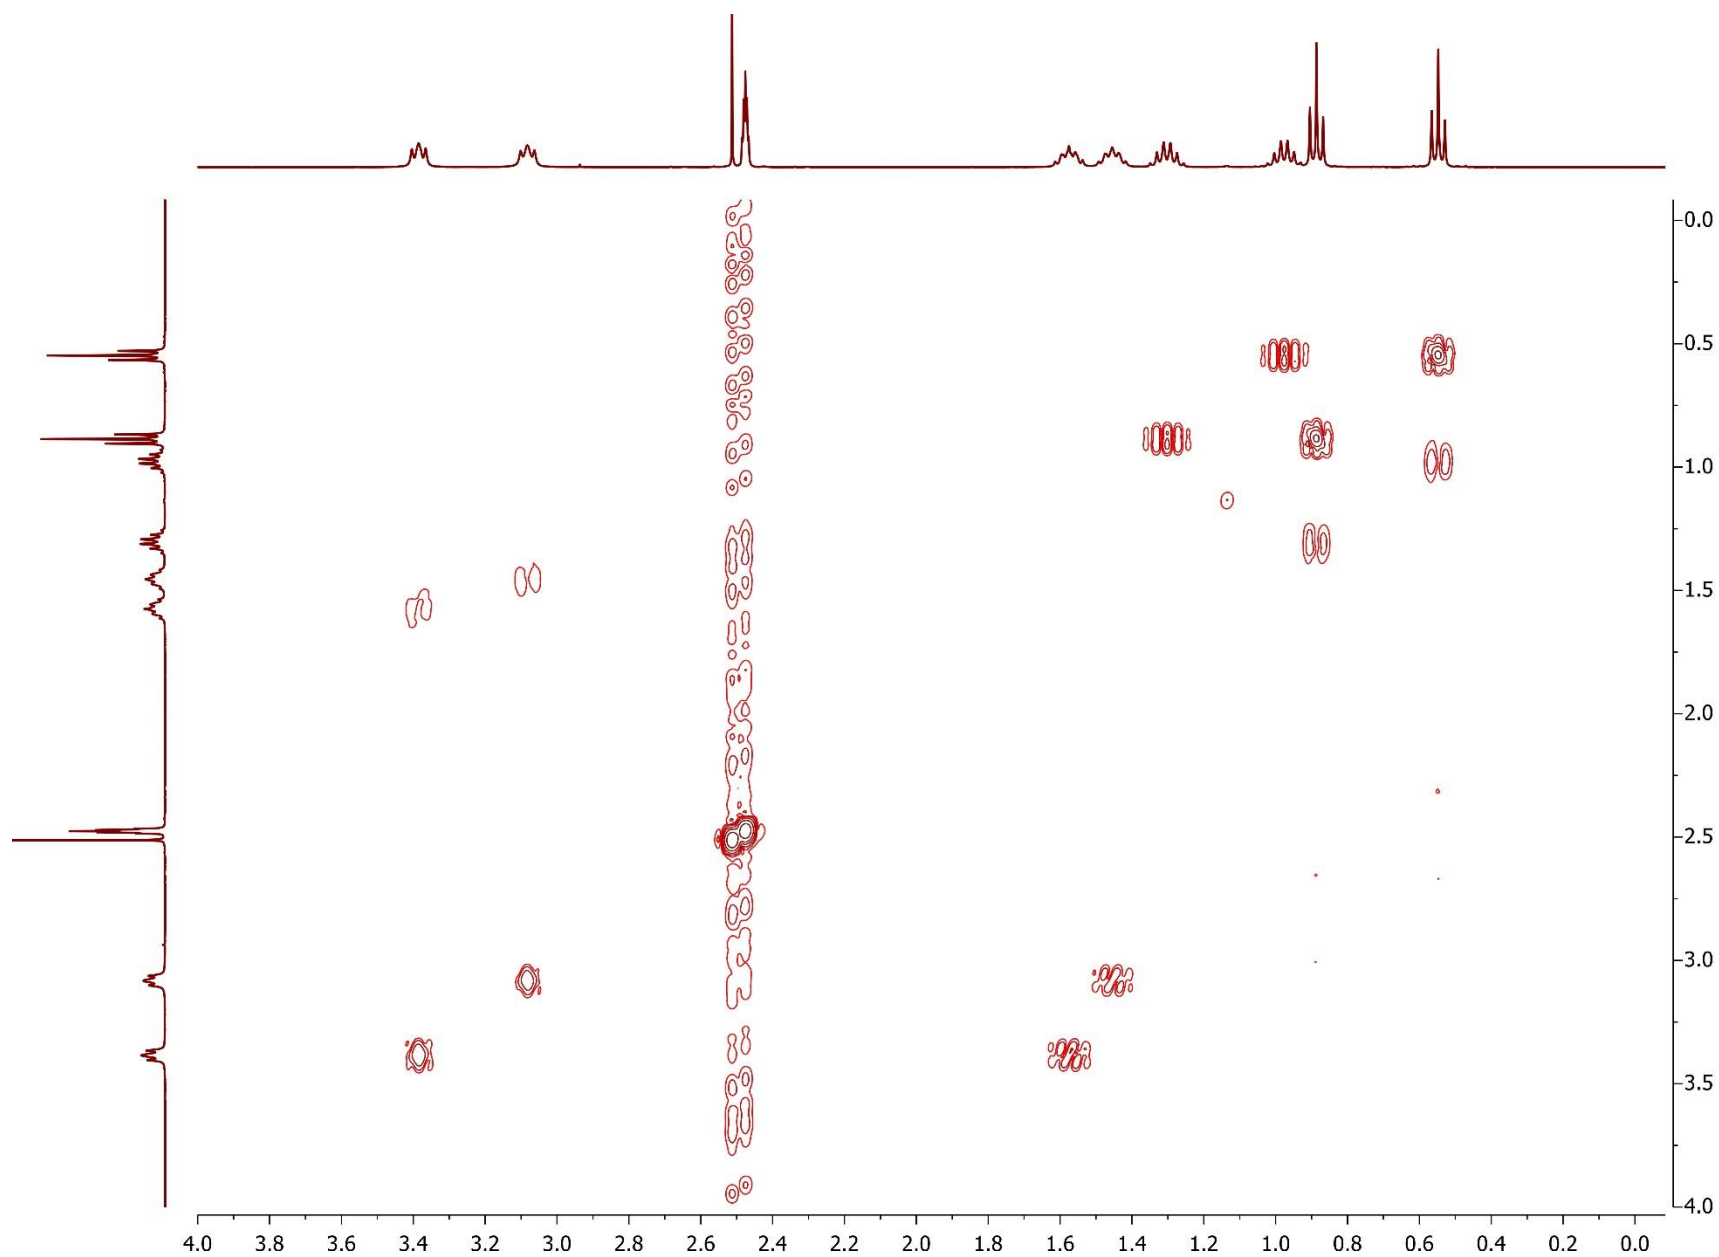

**Figure S13.**  $^1\text{H}/^1\text{H}$  COSY NMR spectrum in DMSO- $d_6$  after adding  $\text{H}^+$

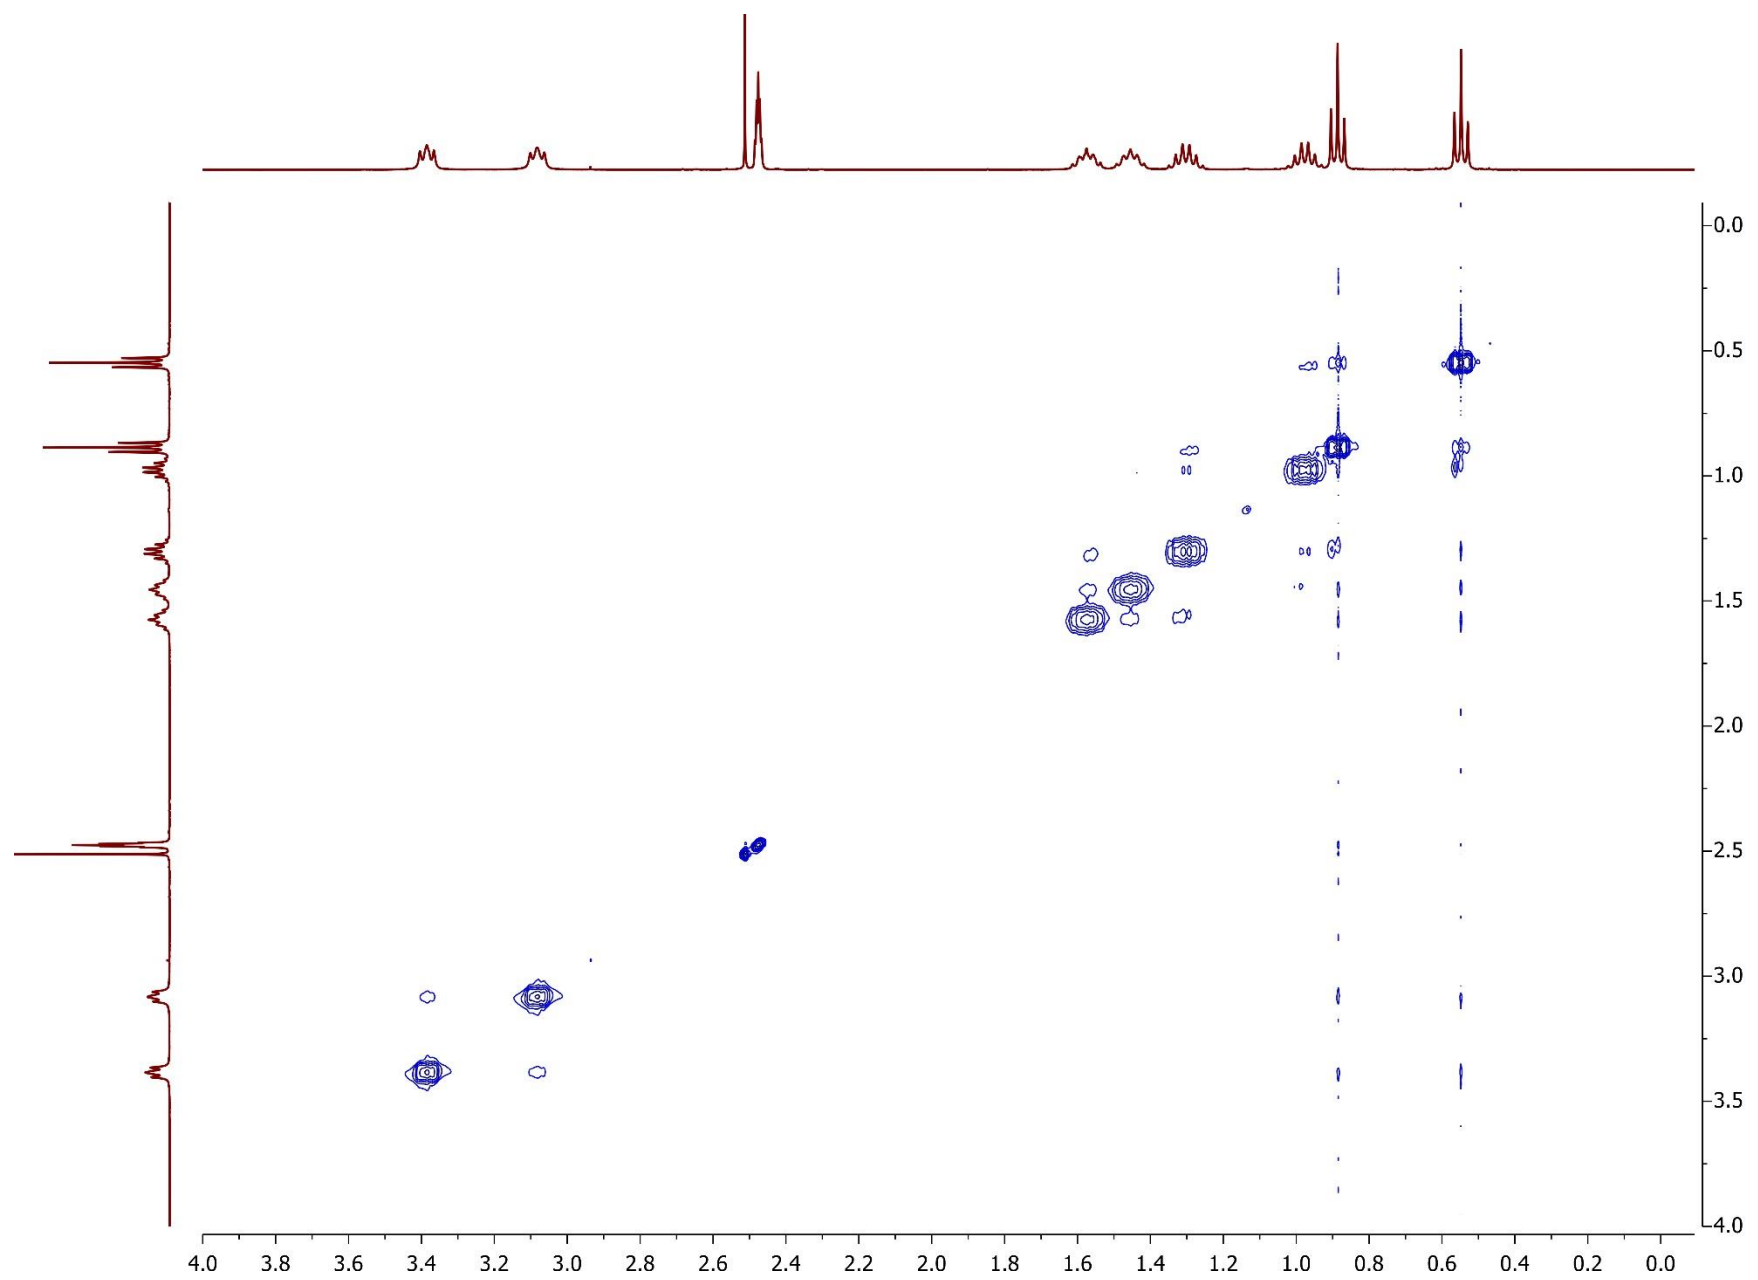

**Figure S14.** <sup>1</sup>H/<sup>1</sup>H NOESY NMR spectrum in DMSO-d<sub>6</sub> after adding H<sup>+</sup>

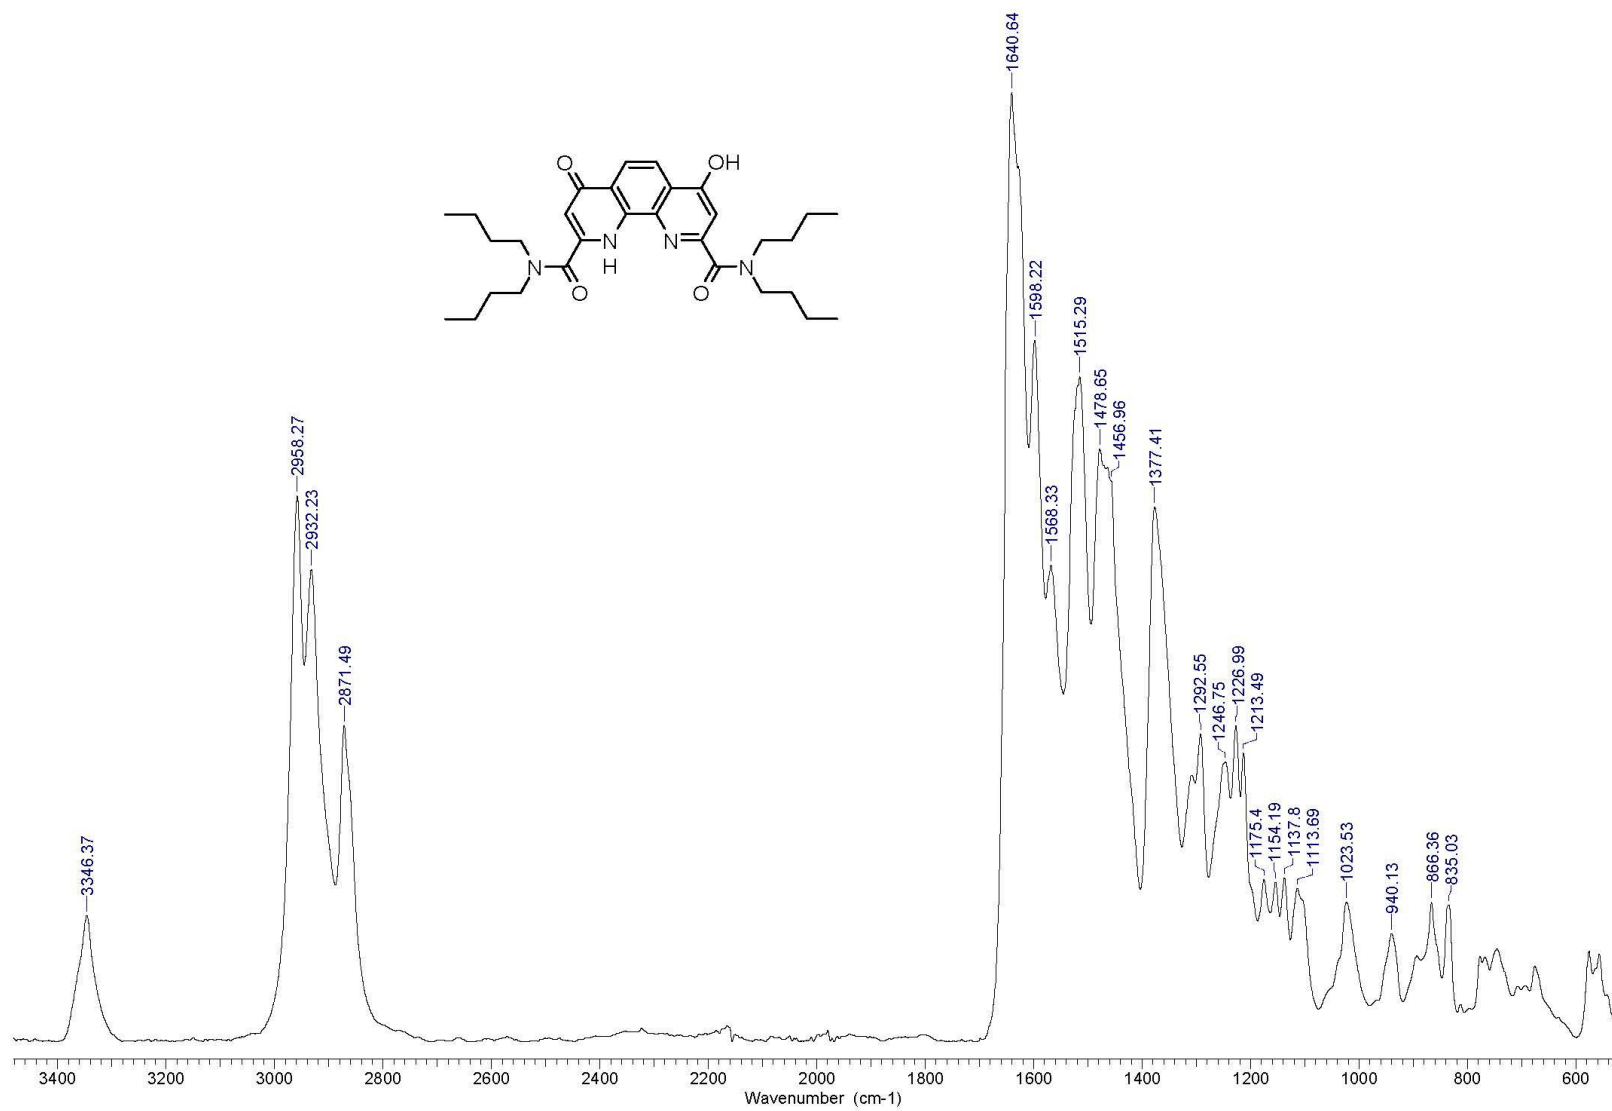

Figure S15. Solid-state IR spectrum at 25°C



**N<sup>2</sup>,N<sup>9</sup>-diethyl-7-hydroxy-4-oxo-N<sup>2</sup>,N<sup>9</sup>-di-p-tolyl-1,4-dihydro-1,10-phenanthroline-2,9-dicarboxamide (5c)**

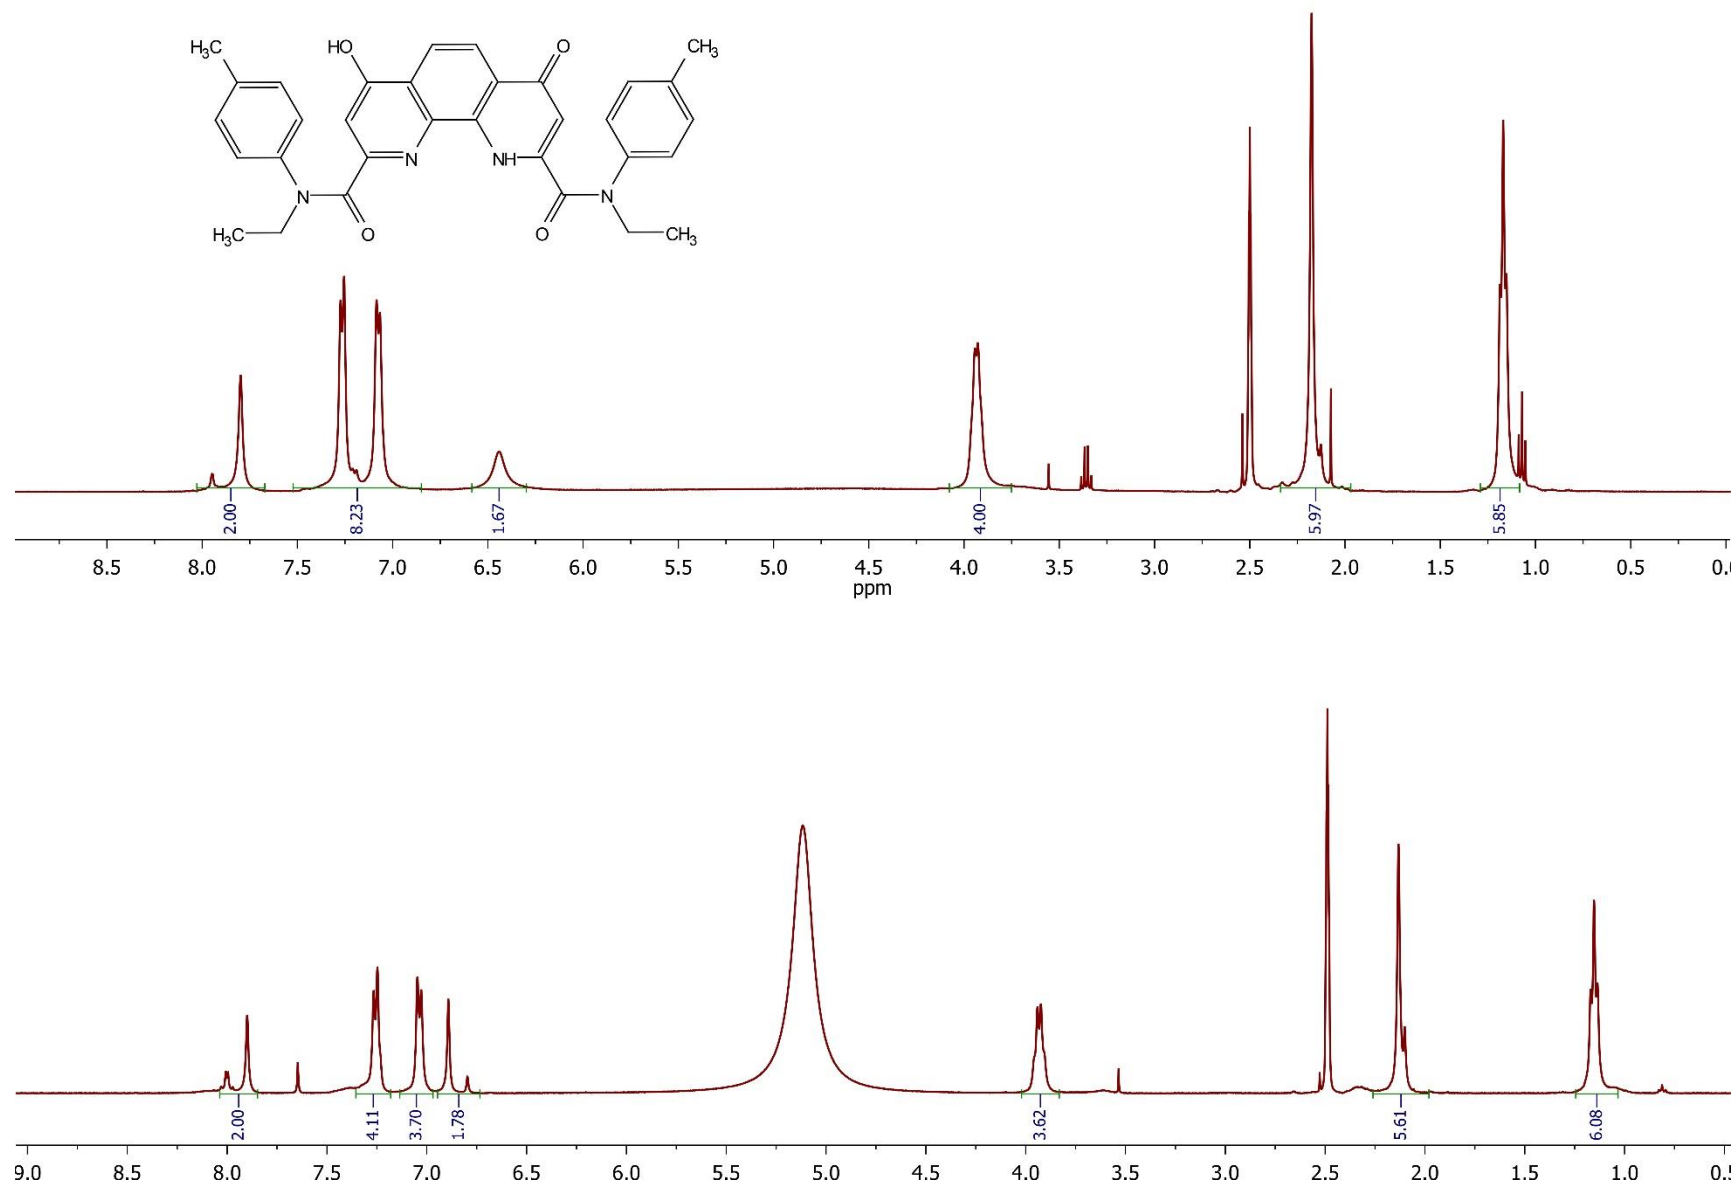

**Figure S16.** <sup>1</sup>H NMR spectra in DMSO-d<sub>6</sub> at (upper) 25°C and (bottom) after adding H<sup>+</sup>

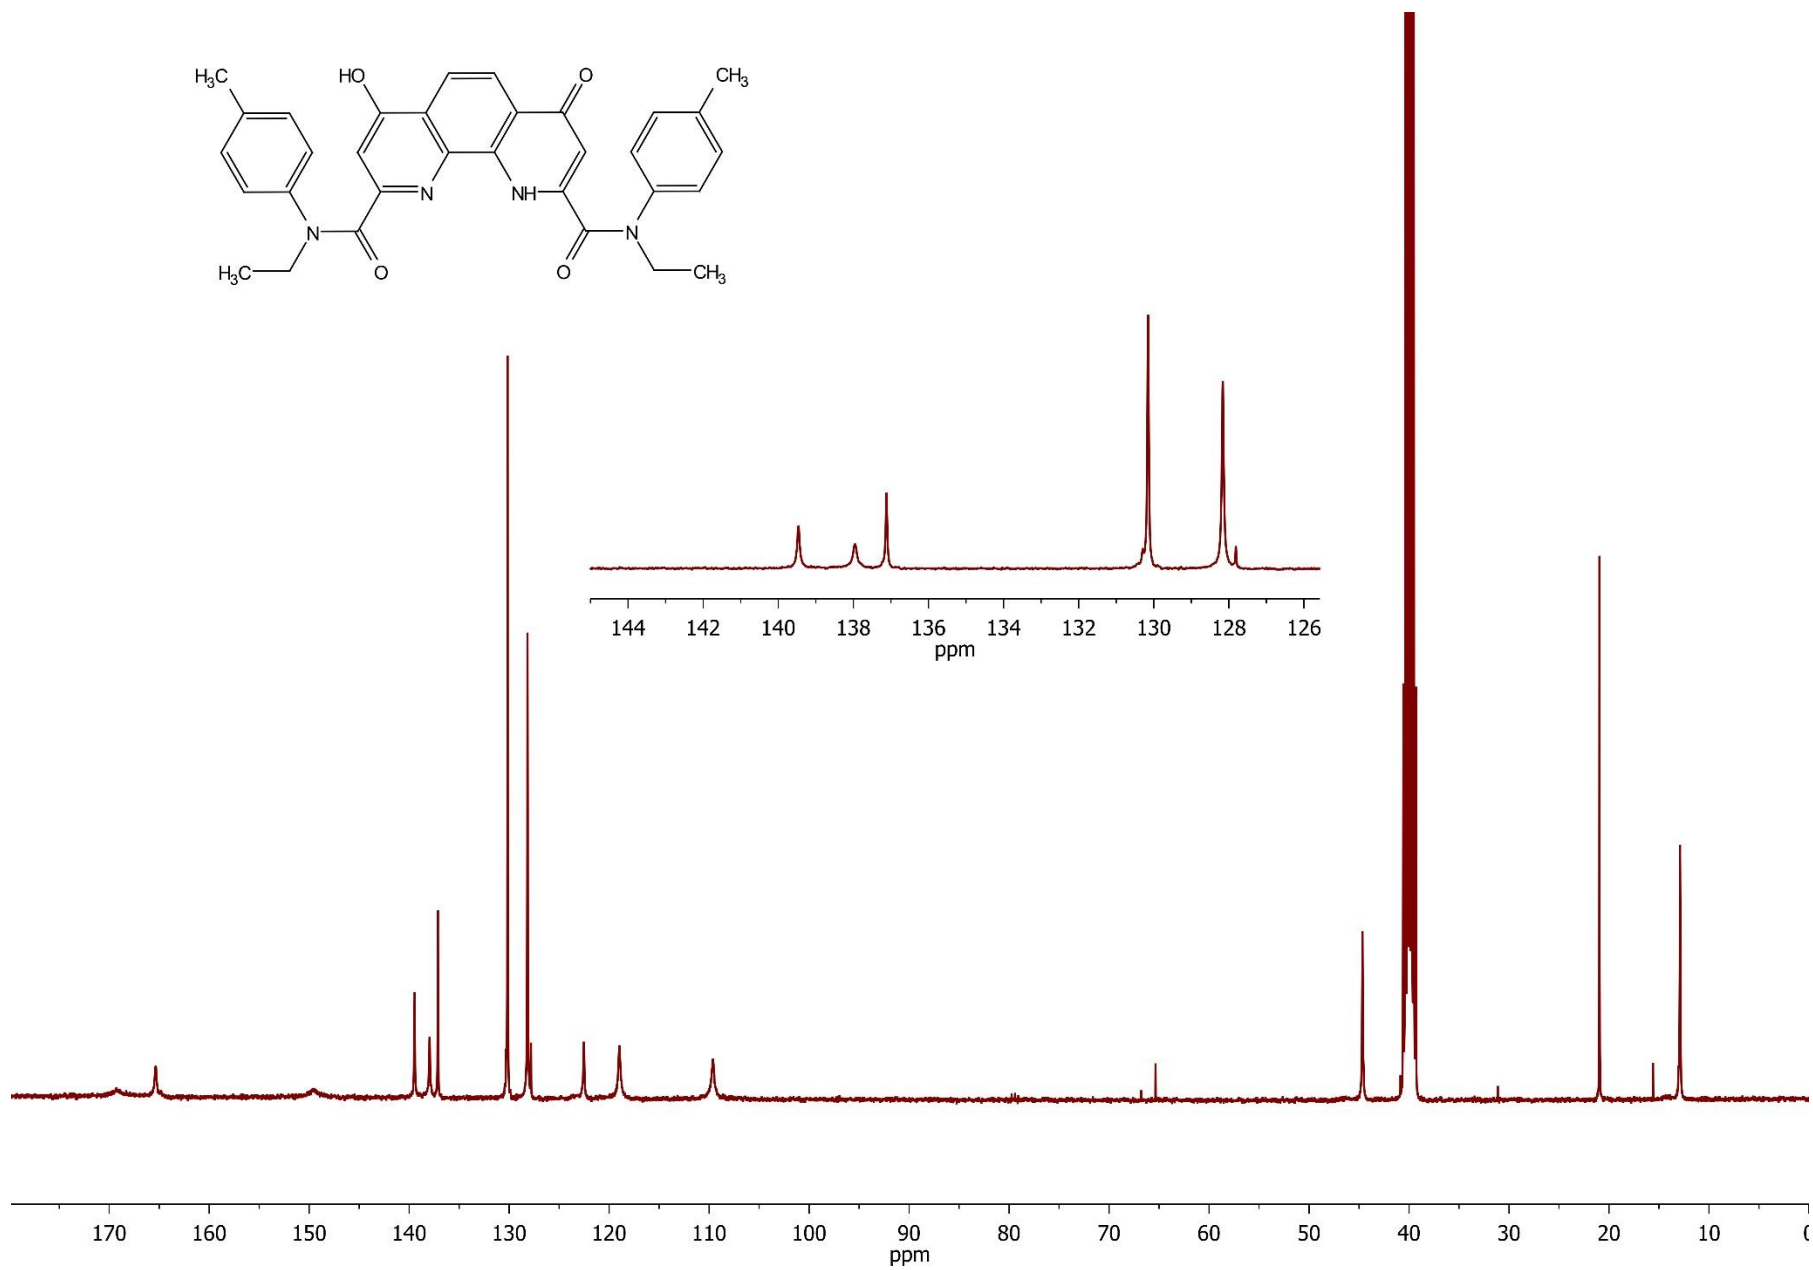

**Figure S17.**  $^{13}\text{C}$  NMR spectra in  $\text{DMSO-d}_6$

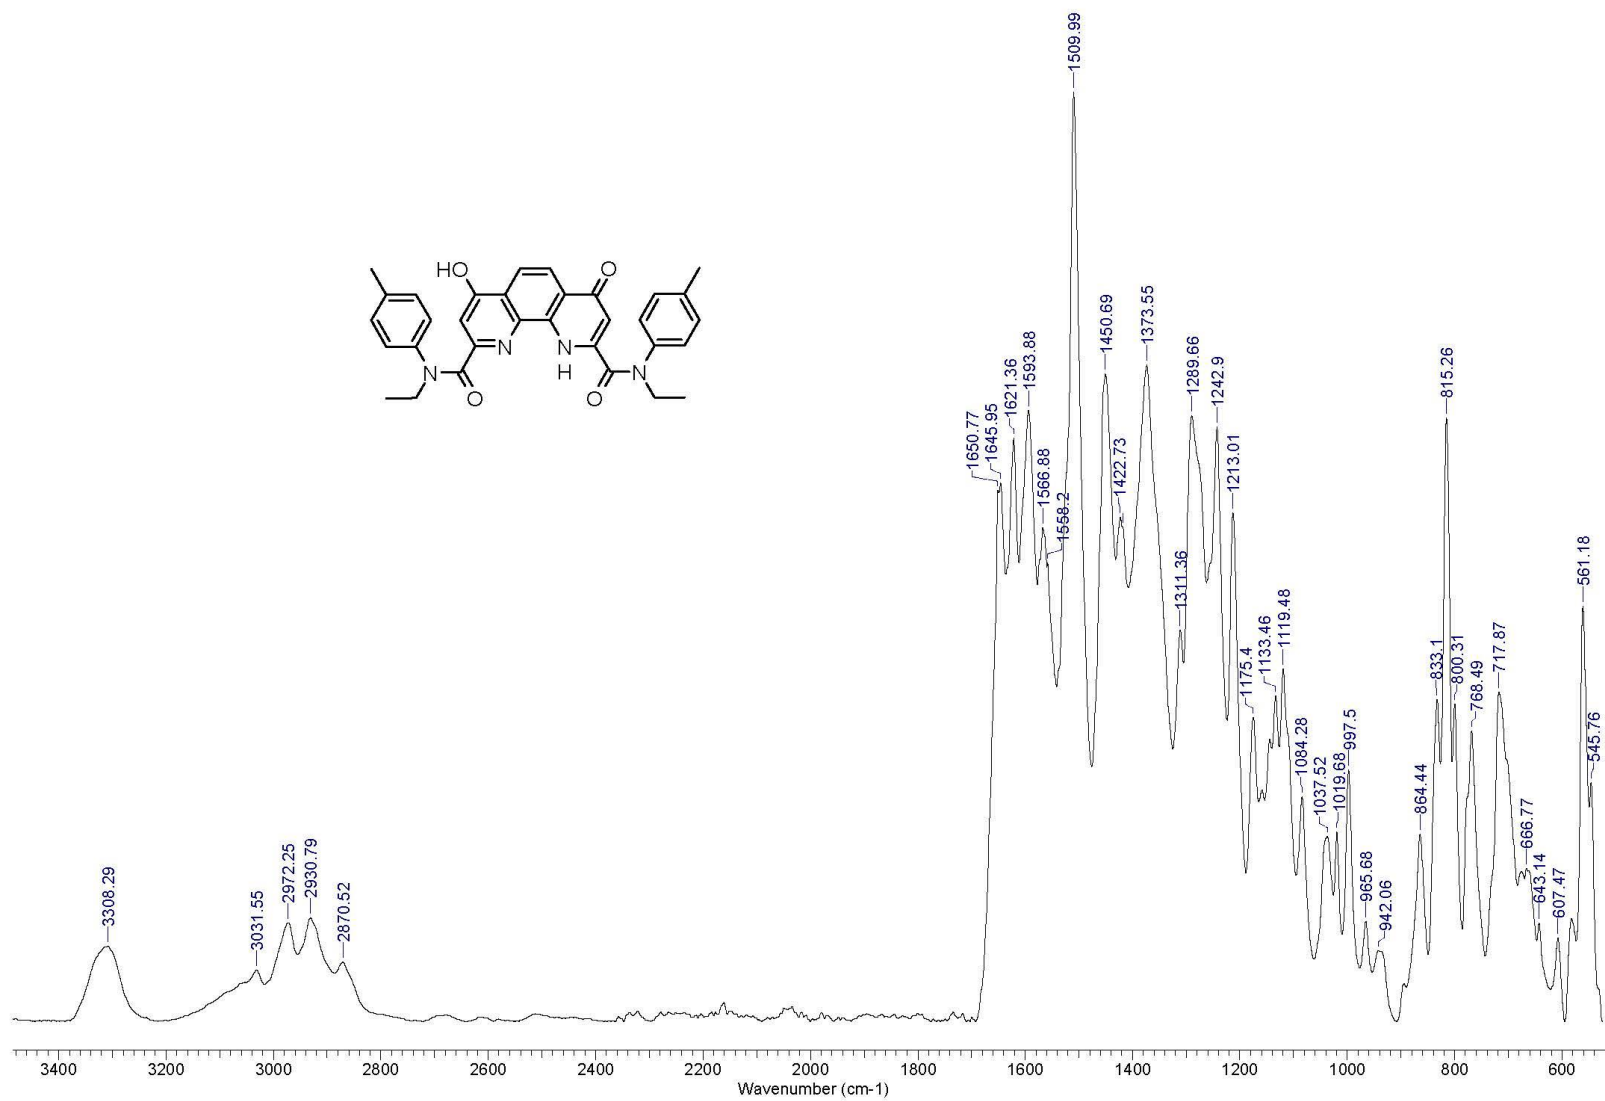

Figure S18. Solid-state IR spectrum at 25°C

**N<sup>2</sup>,N<sup>9</sup>-bis(4-butylphenyl)-N<sup>2</sup>,N<sup>9</sup>-diethyl-7-hydroxy-4-oxo-1,4-dihydro-1,10-phenanthroline-2,9-dicarboxamide (5d)**

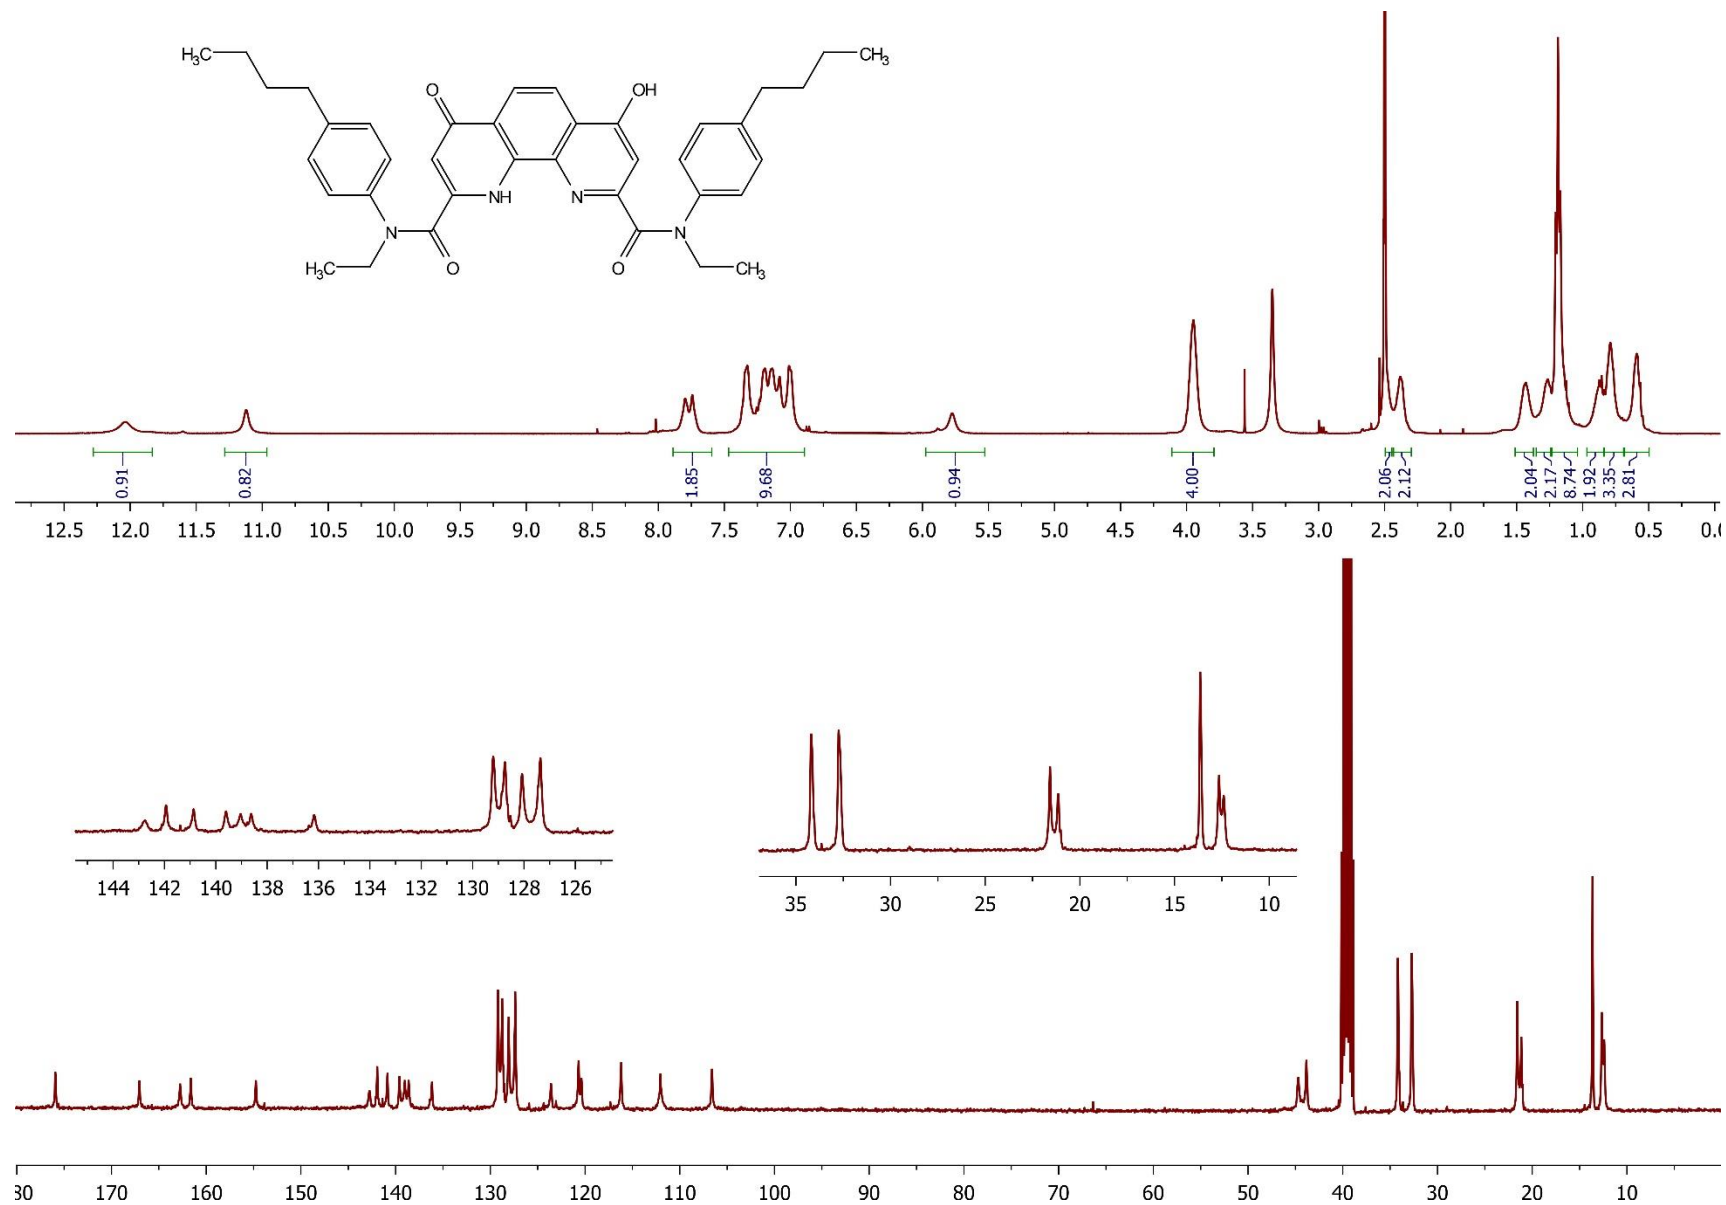

**Figure S19.** <sup>1</sup>H (upper) and <sup>13</sup>C (bottom) NMR spectra in DMSO-d<sub>6</sub> at 25°C

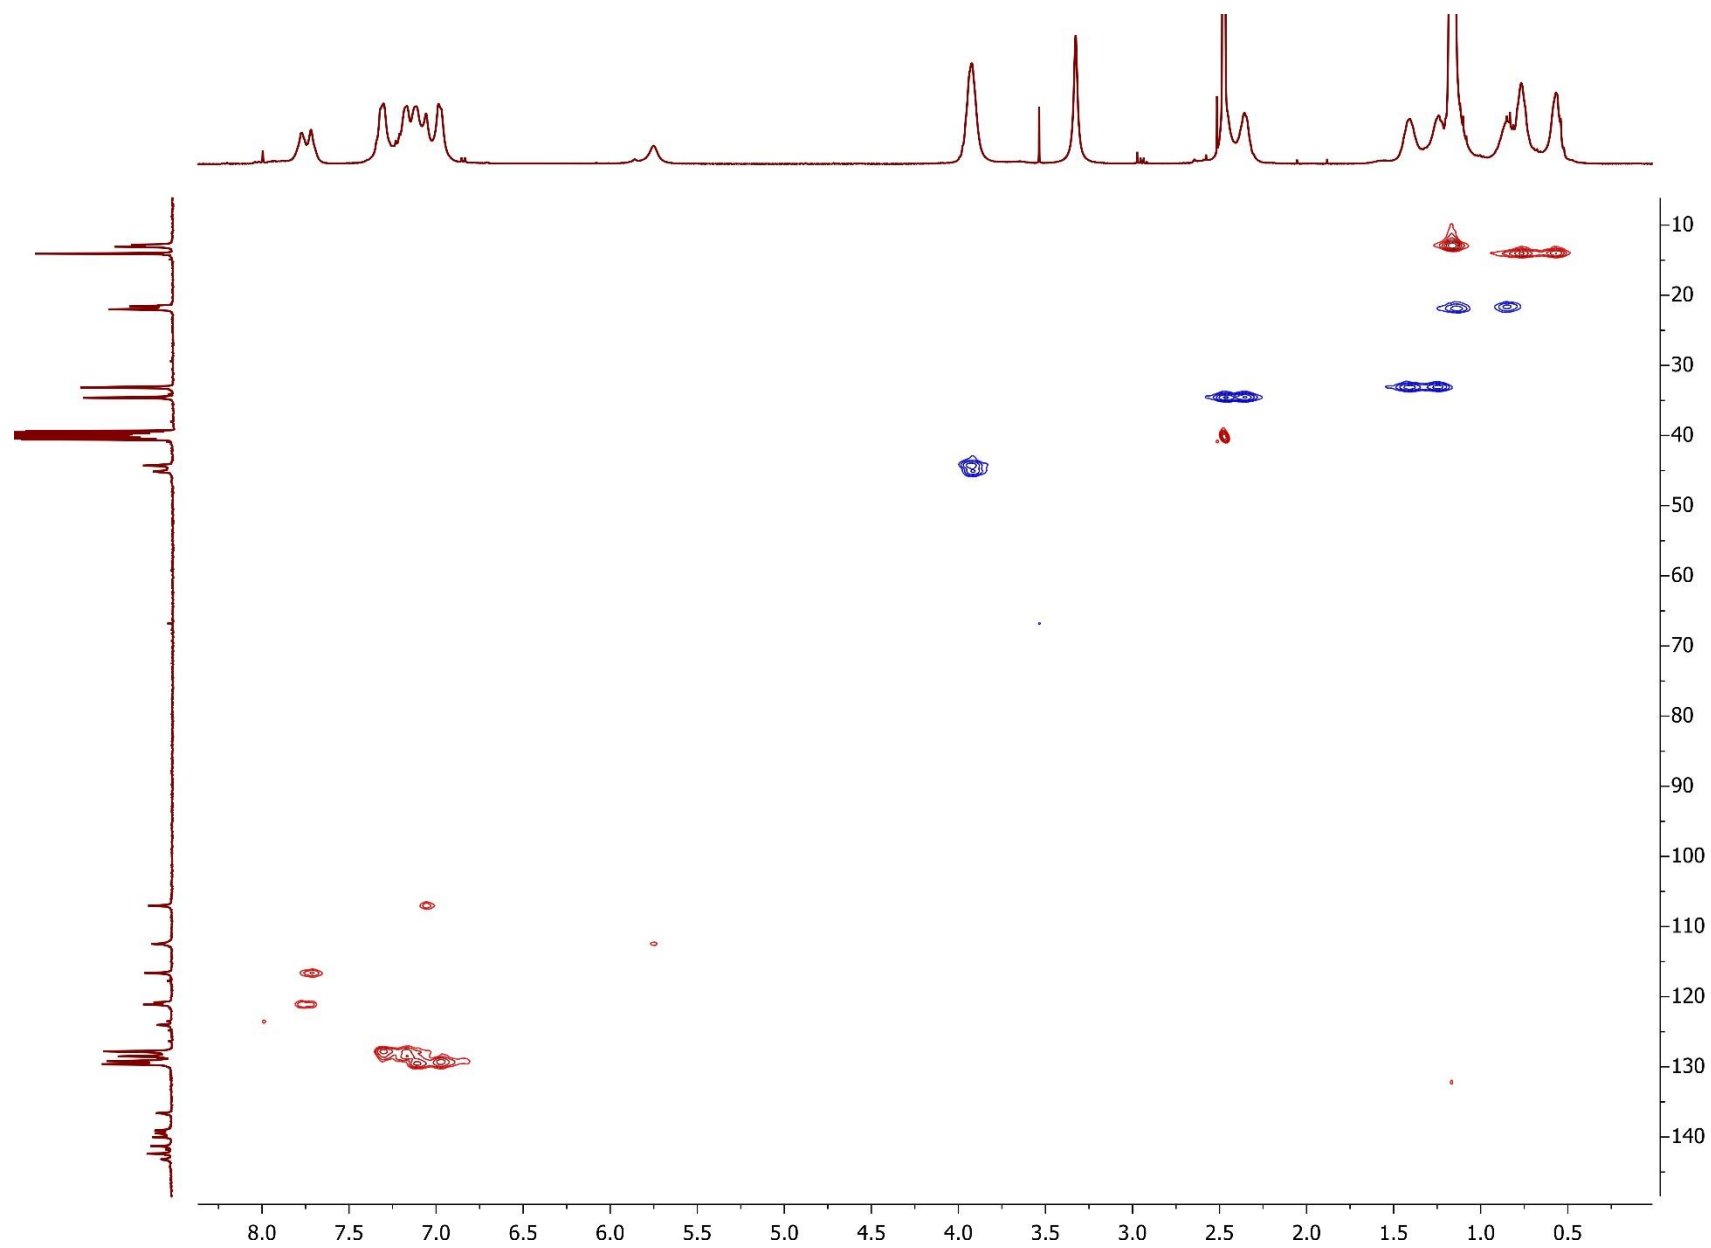

**Figure S20.**  $^1\text{H}/^{13}\text{C}$  HSQC NMR spectrum in DMSO- $d_6$  at 25°C

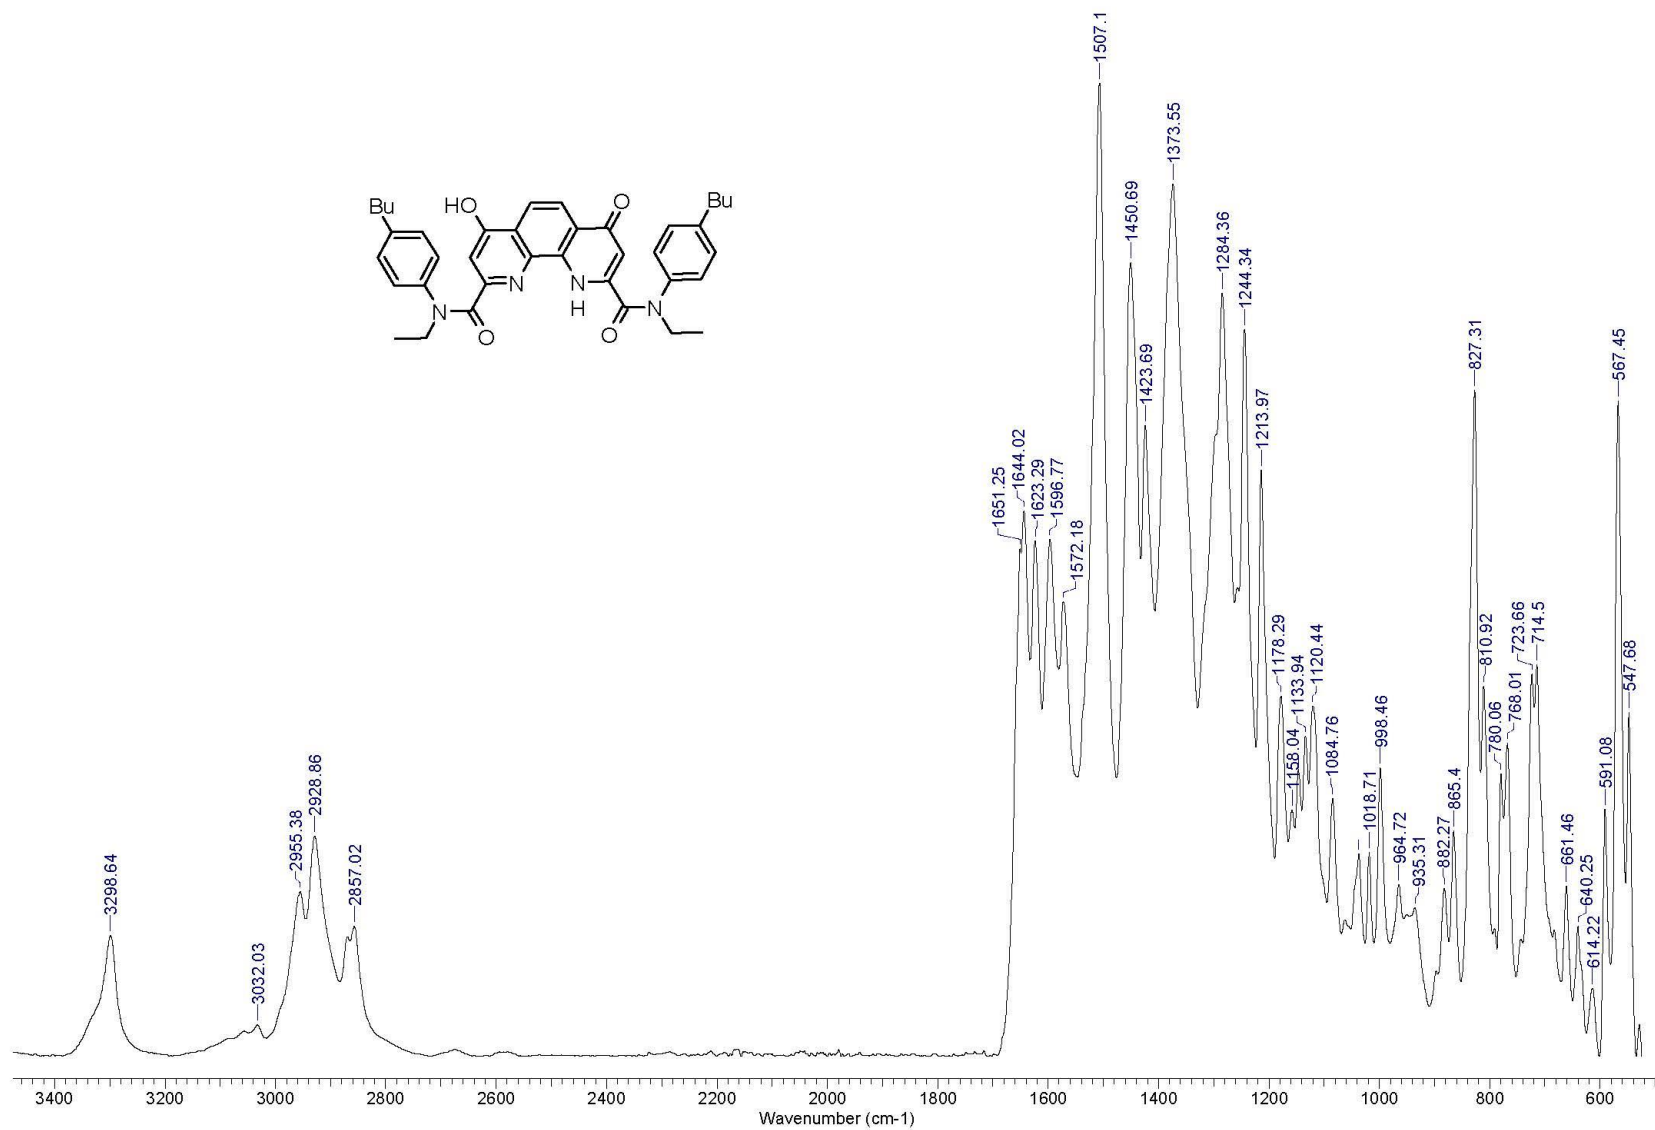

Figure S21. Solid-state IR spectrum at 25°C

**N<sup>2</sup>,N<sup>2</sup>,N<sup>9</sup>,N<sup>9</sup>-tetrabutyl-4,7-dihydroxy-1,10-phenanthroline-2,9-dicarboxamide lanthanum trinitrate 5a•La(NO<sub>3</sub>)<sub>3</sub>**

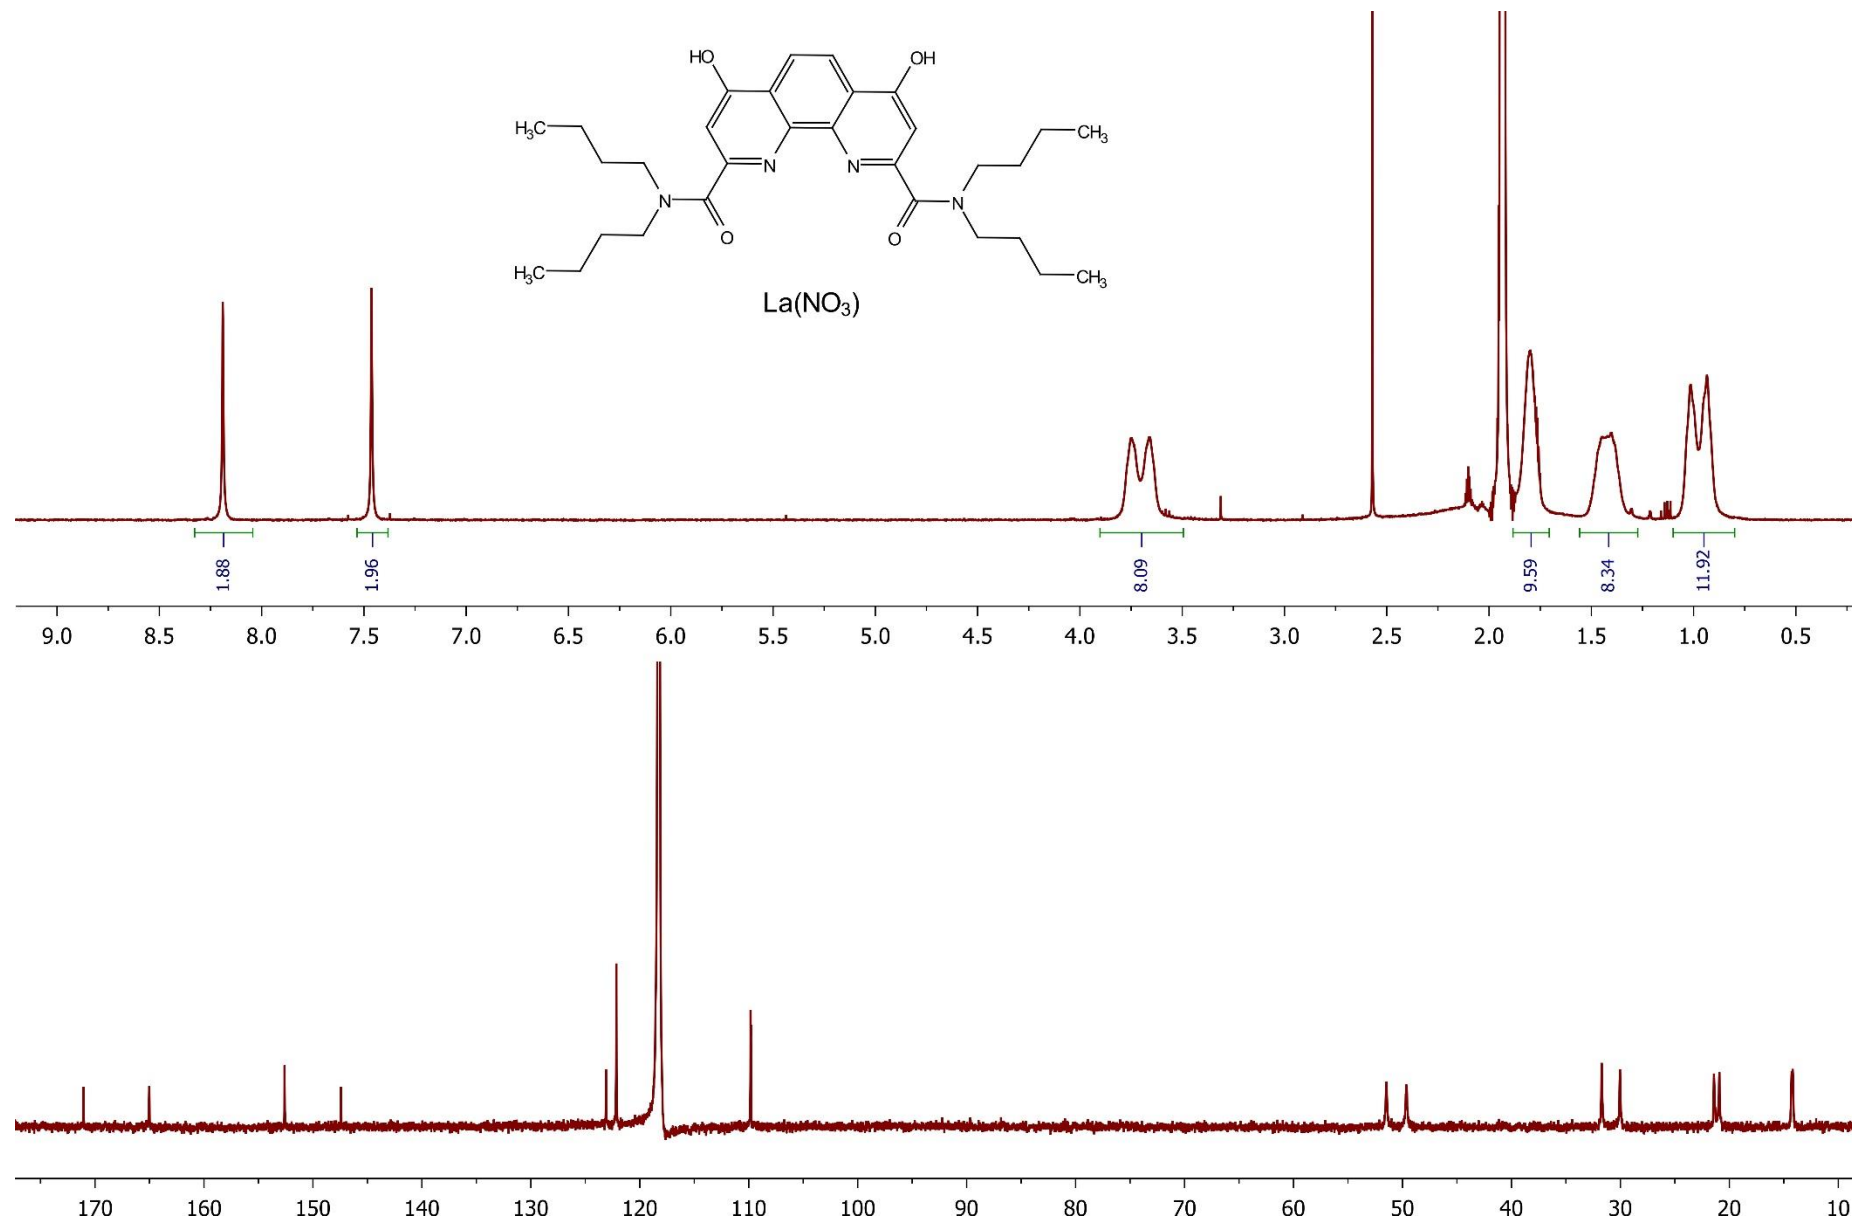

**Figure S22.** (Upper) <sup>1</sup>H and (bottom) <sup>13</sup>C NMR spectra in CD<sub>3</sub>CN at 60°C

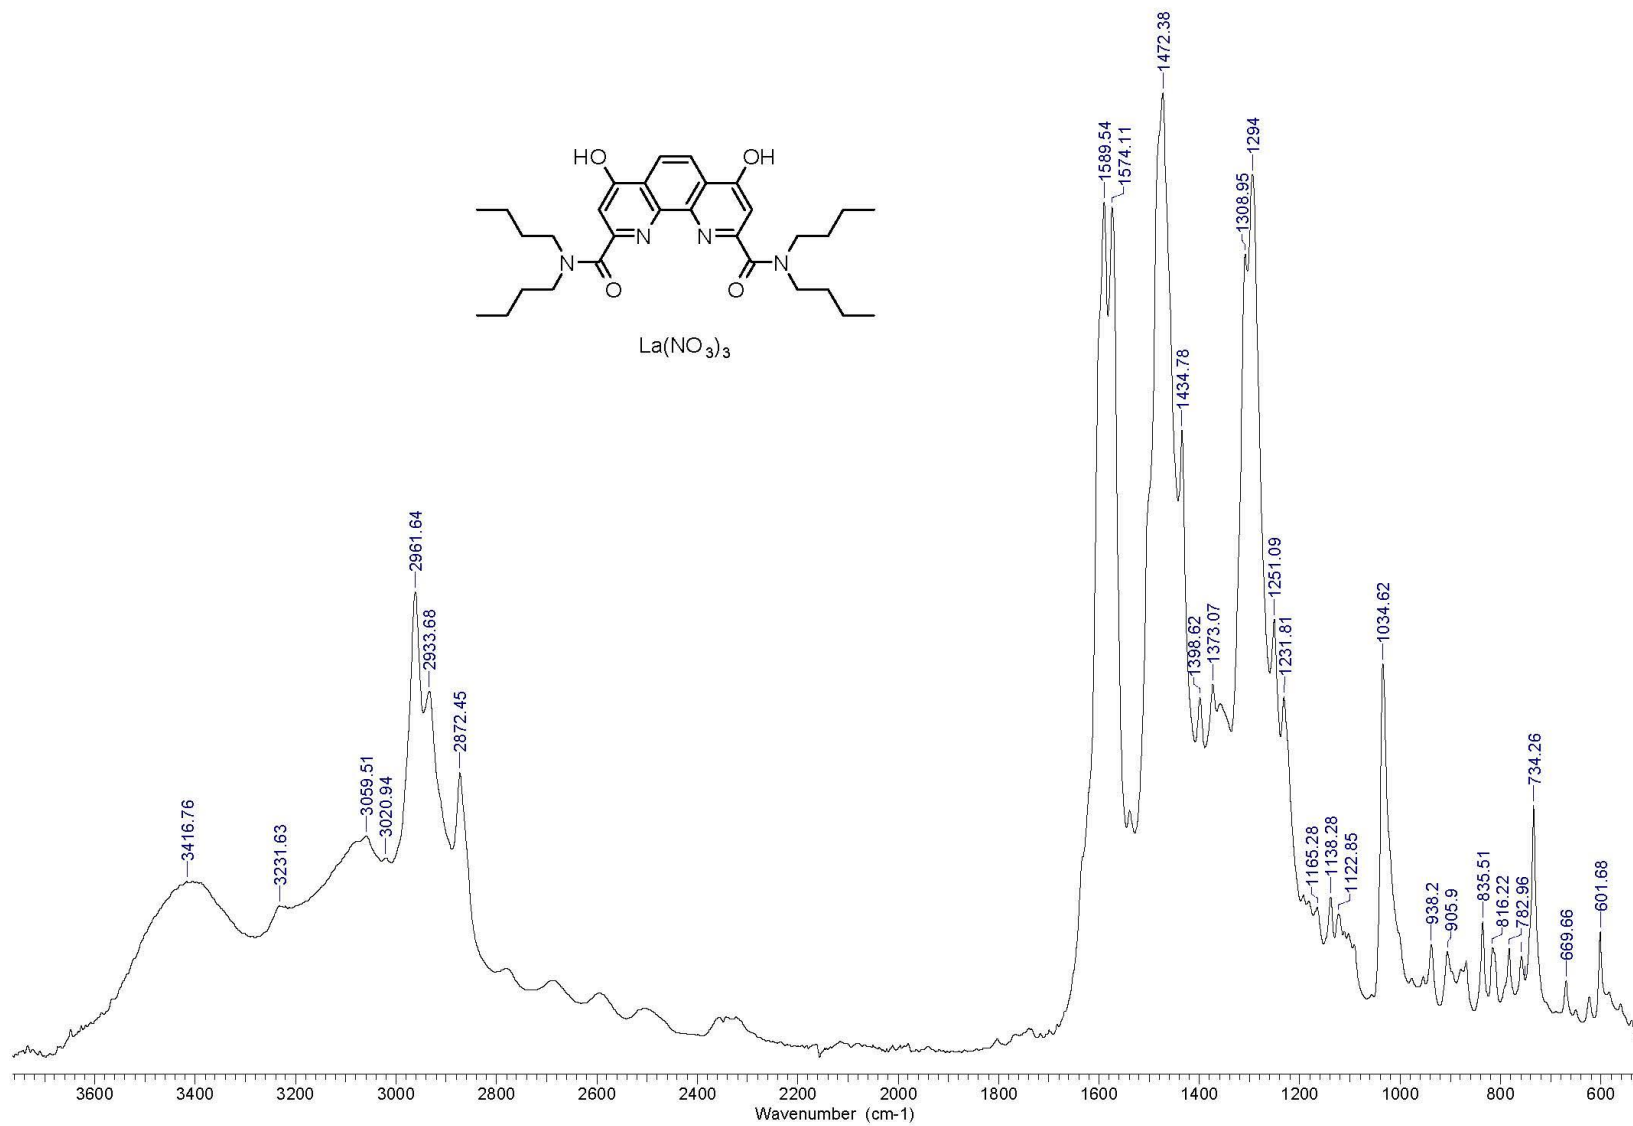

Figure S23. Solid-state IR spectrum at 25°C



**$N^2,N^2,N^9,N^9$ -tetrabutyl-4,7-dihydroxy-1,10-phenanthroline-2,9-dicarboxamide neodymium trinitrate  $5a \cdot Nd(NO_3)_3$**

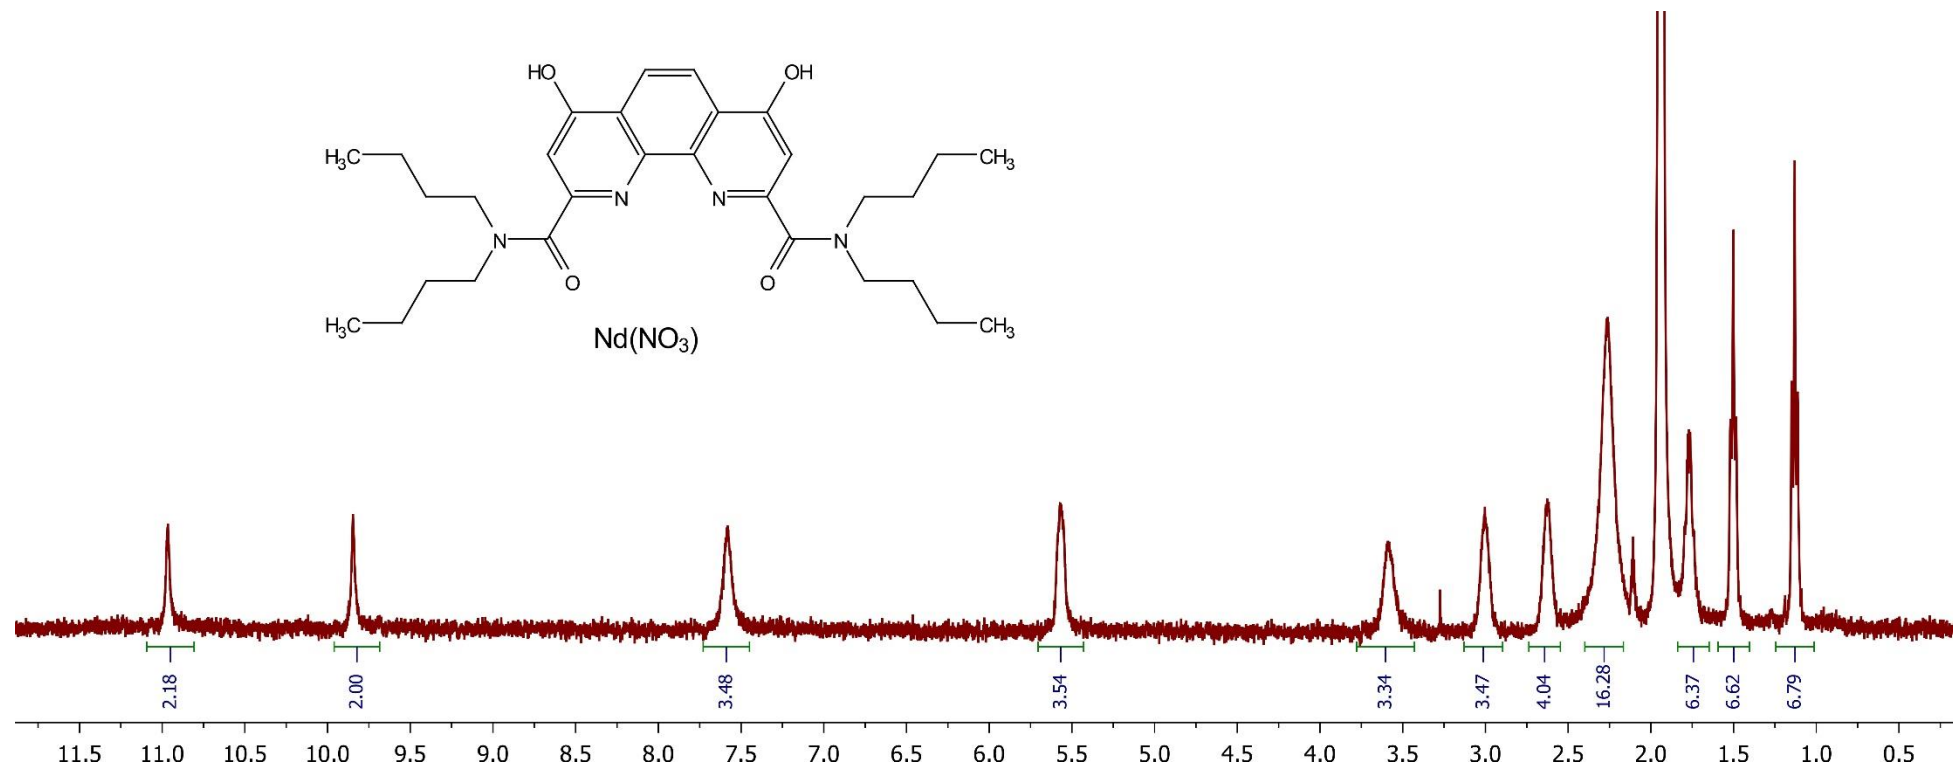

**Figure S24.**  $^1H$  and  $^{13}C$  NMR spectrum in  $CD_3CN$  at  $25^\circ C$

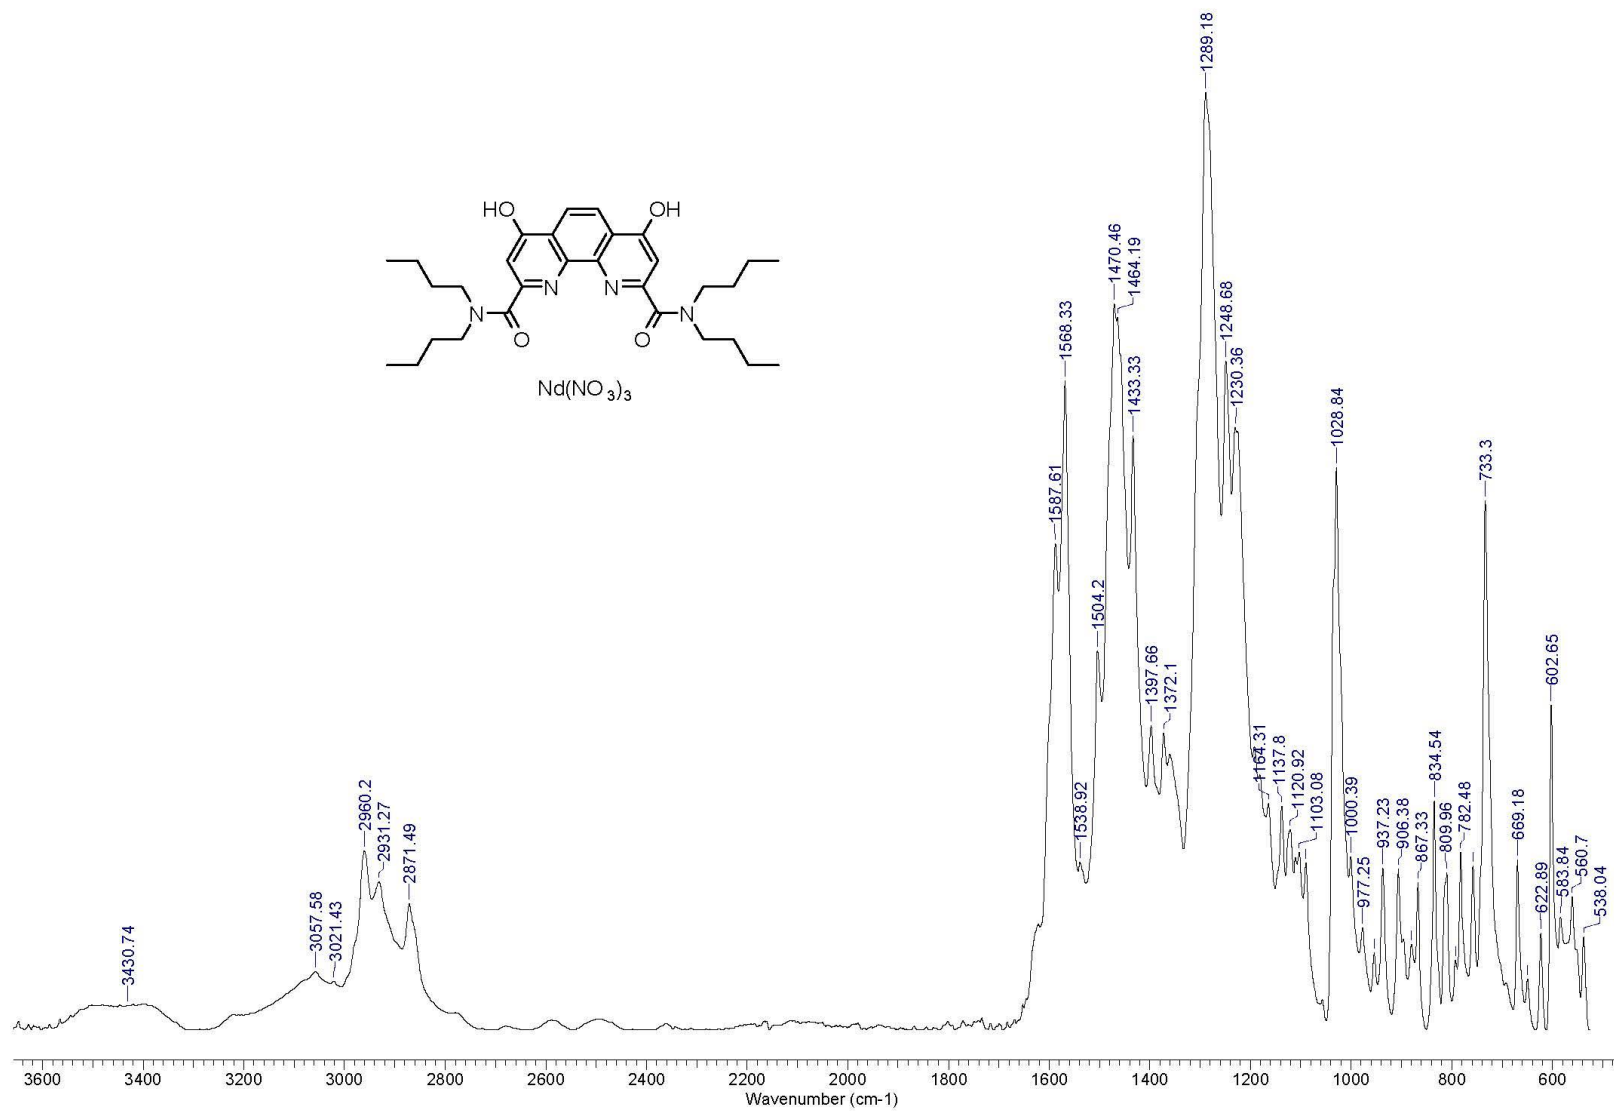

Figure S25. Solid-state IR spectrum at 25°C

**N<sup>2</sup>,N<sup>2</sup>,N<sup>9</sup>,N<sup>9</sup>-tetrabutyl-4,7-dihydroxy-1,10-phenanthroline-2,9-dicarboxamide europium trinitrate 5a•Eu(NO<sub>3</sub>)<sub>3</sub>**

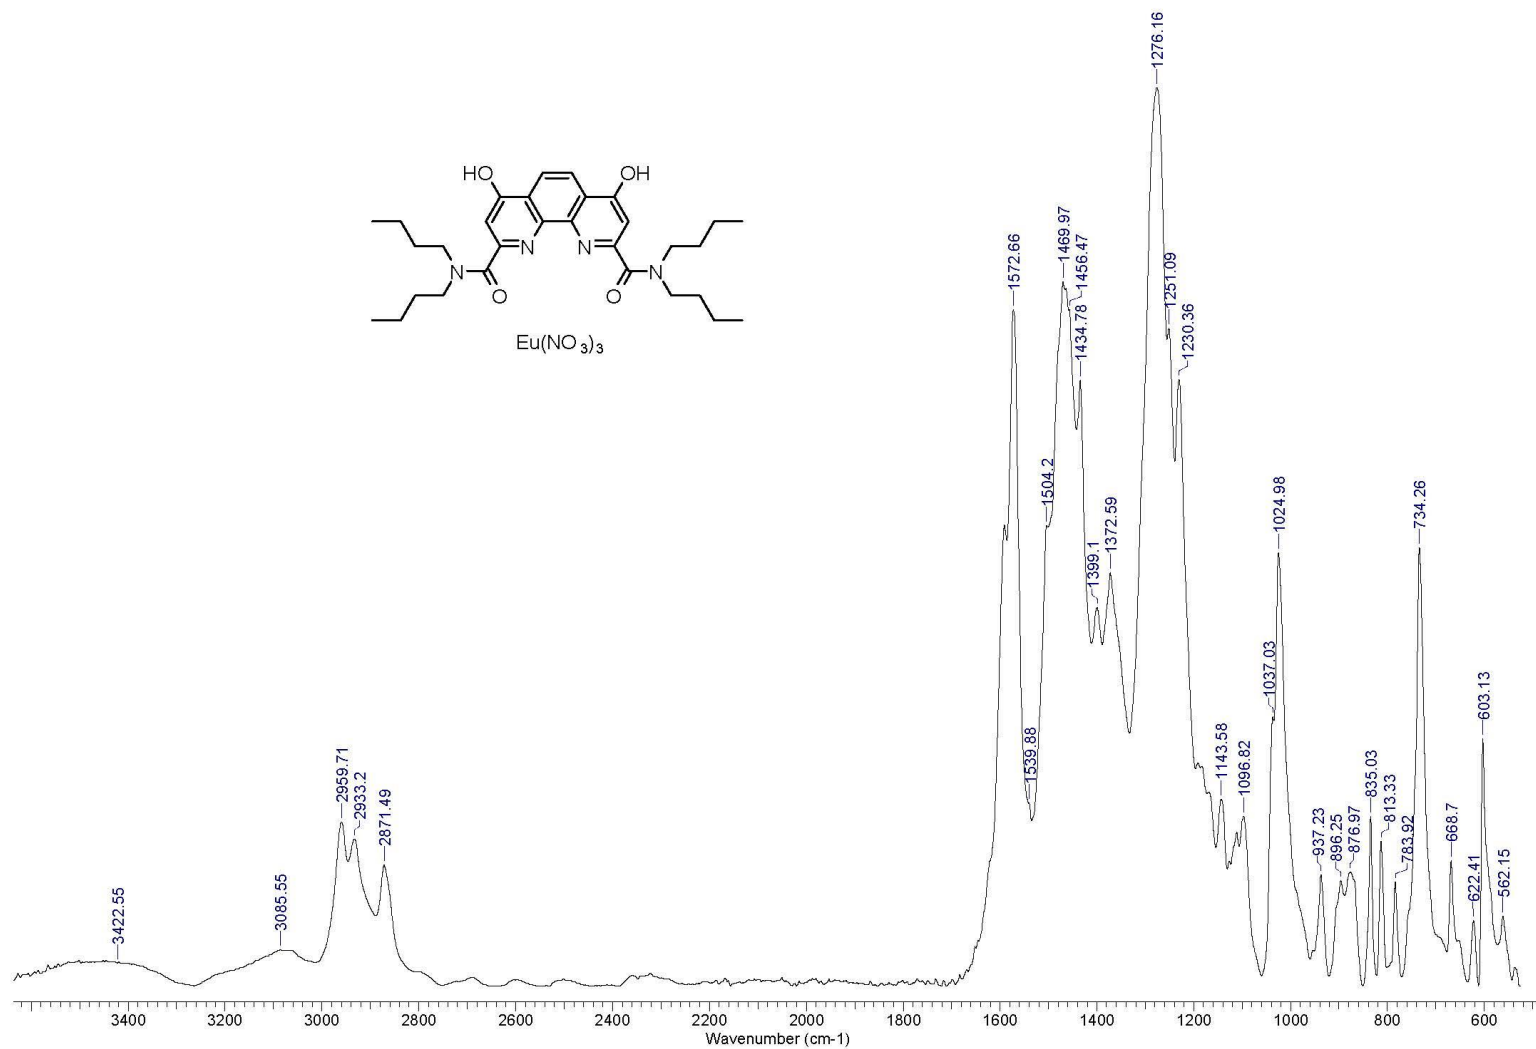

**Figure S26.** Solid-state IR spectrum at 25°C

**N<sup>2</sup>,N<sup>2</sup>,N<sup>9</sup>,N<sup>9</sup>-tetrabutyl-4,7-dihydroxy-1,10-phenanthroline-2,9-dicarboxamide lutetium trinitrate 5a•Lu(NO<sub>3</sub>)<sub>3</sub>**

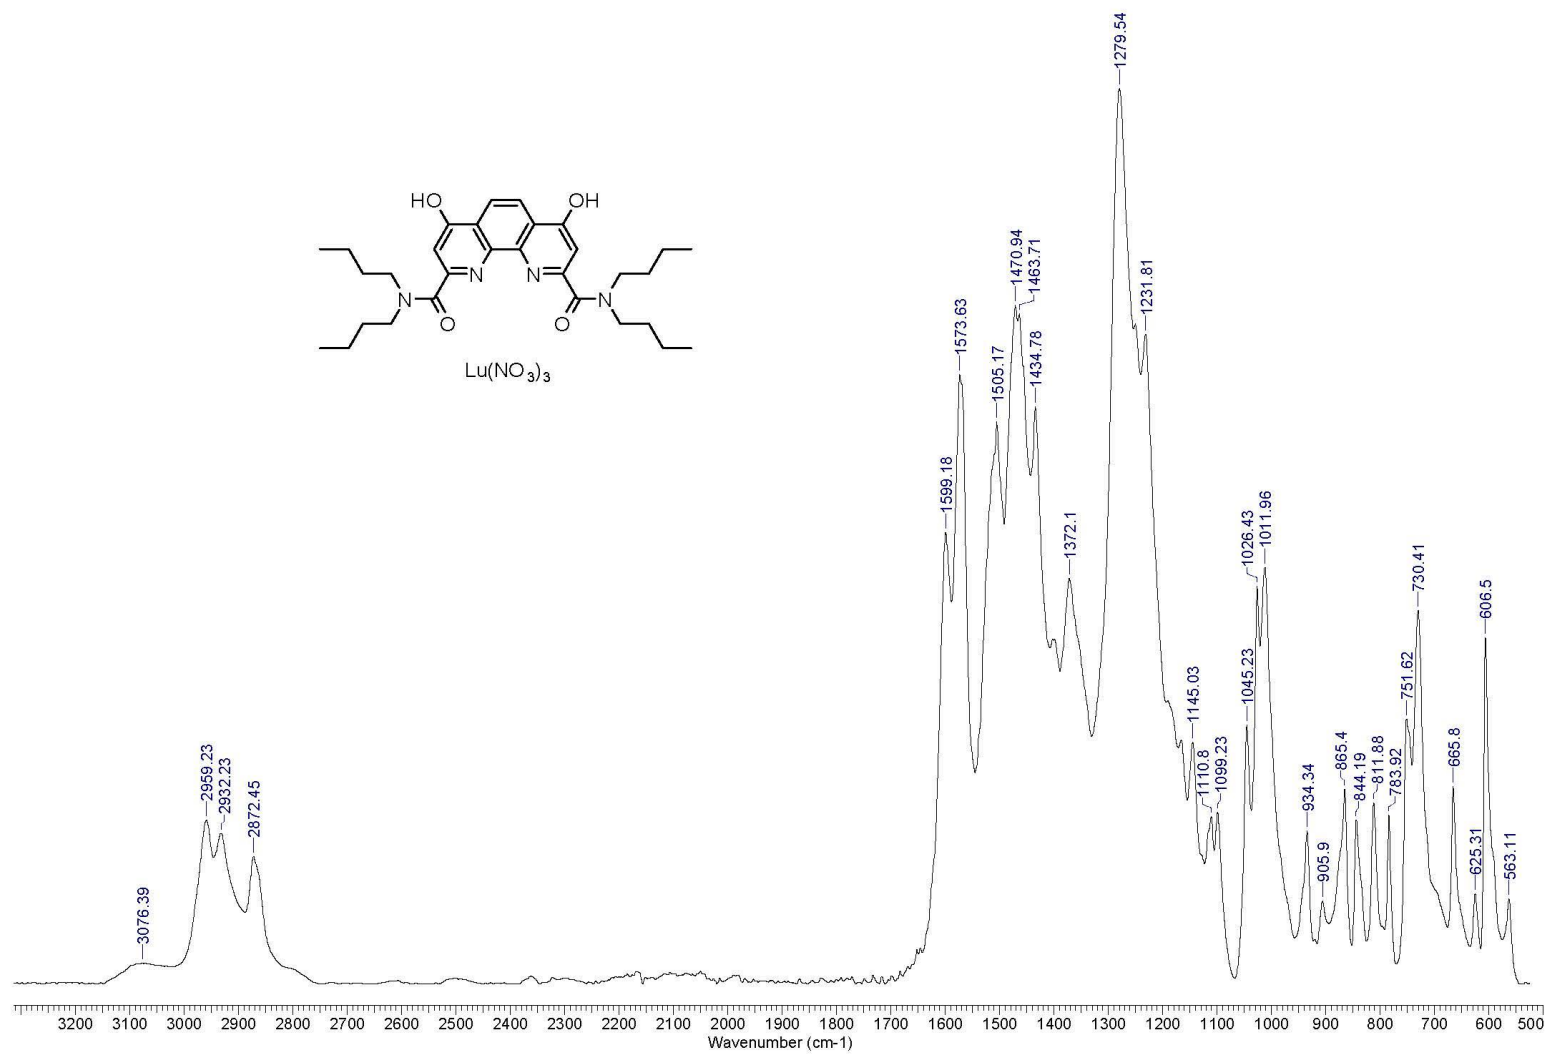

**Figure S27.** Solid-state IR spectrum at 25°C

**N<sup>2</sup>,N<sup>9</sup>-diethyl-4,7-dihydroxy-N<sup>2</sup>,N<sup>9</sup>-di-p-tolyl-1,10-phenanthroline-2,9-dicarboxamide lanthanum trinitrate 5c•La(NO<sub>3</sub>)<sub>3</sub>**

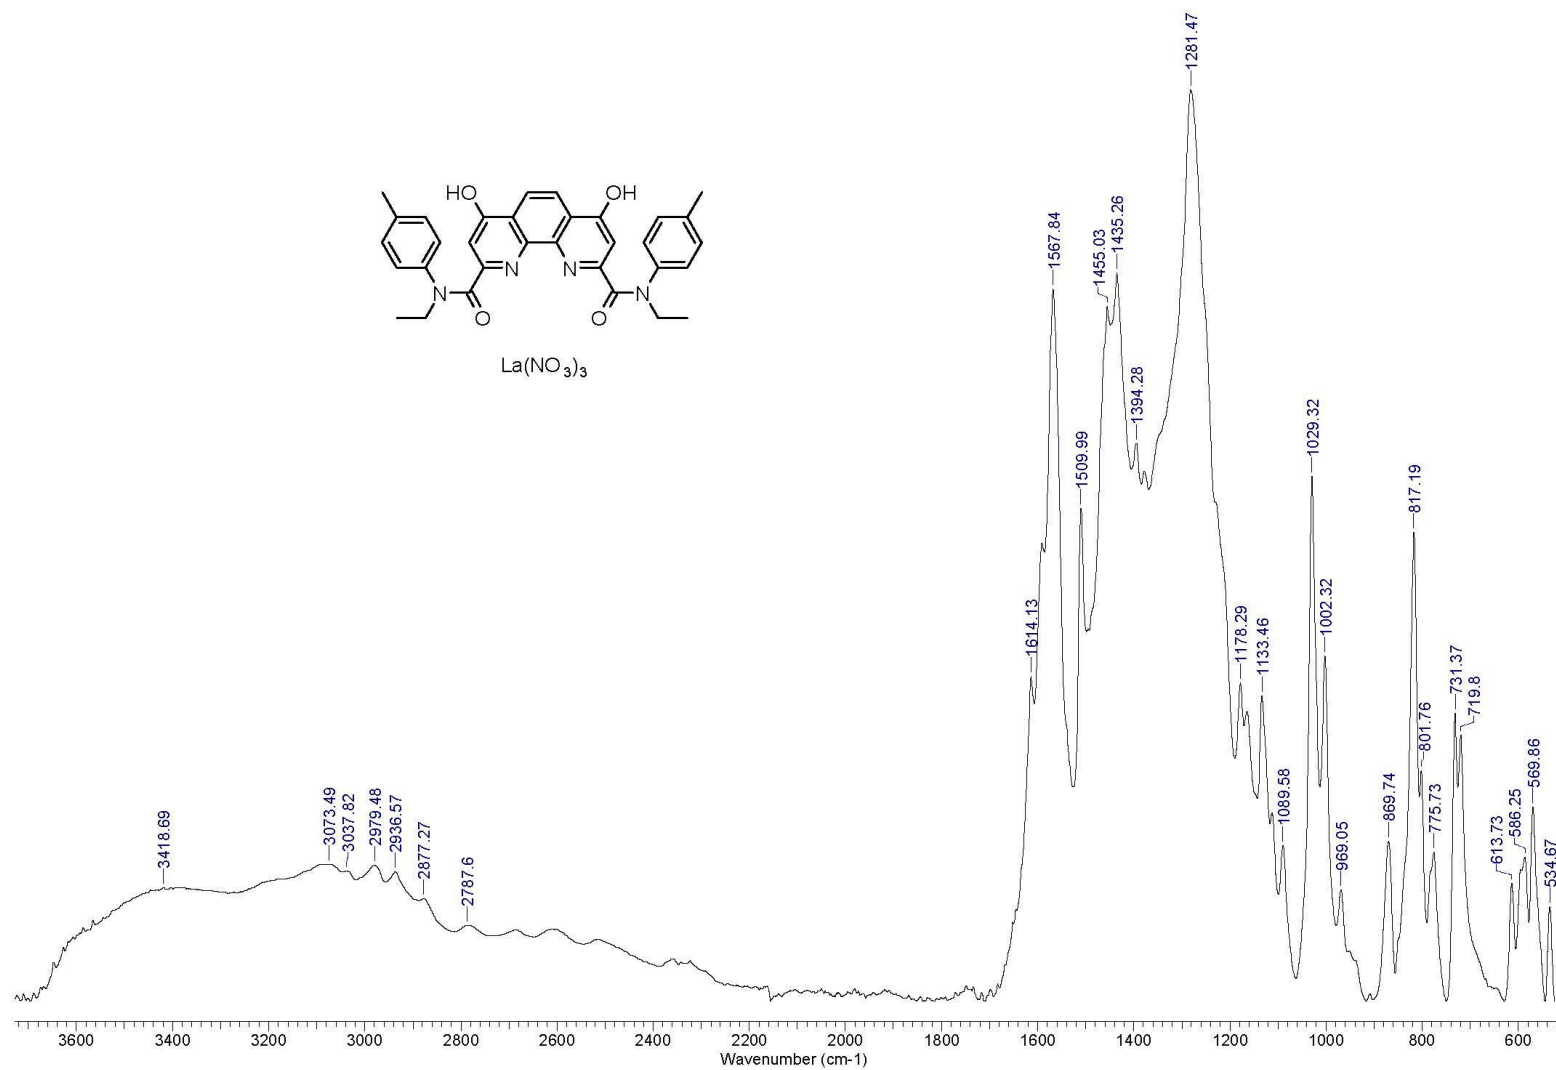

**Figure S28.** Solid-state IR spectrum at 25°C

**N<sup>2</sup>,N<sup>9</sup>-diethyl-4,7-dihydroxy-N<sup>2</sup>,N<sup>9</sup>-di-p-tolyl-1,10-phenanthroline-2,9-dicarboxamide neodymium trinitrate 5c•Nd(NO<sub>3</sub>)<sub>3</sub>**

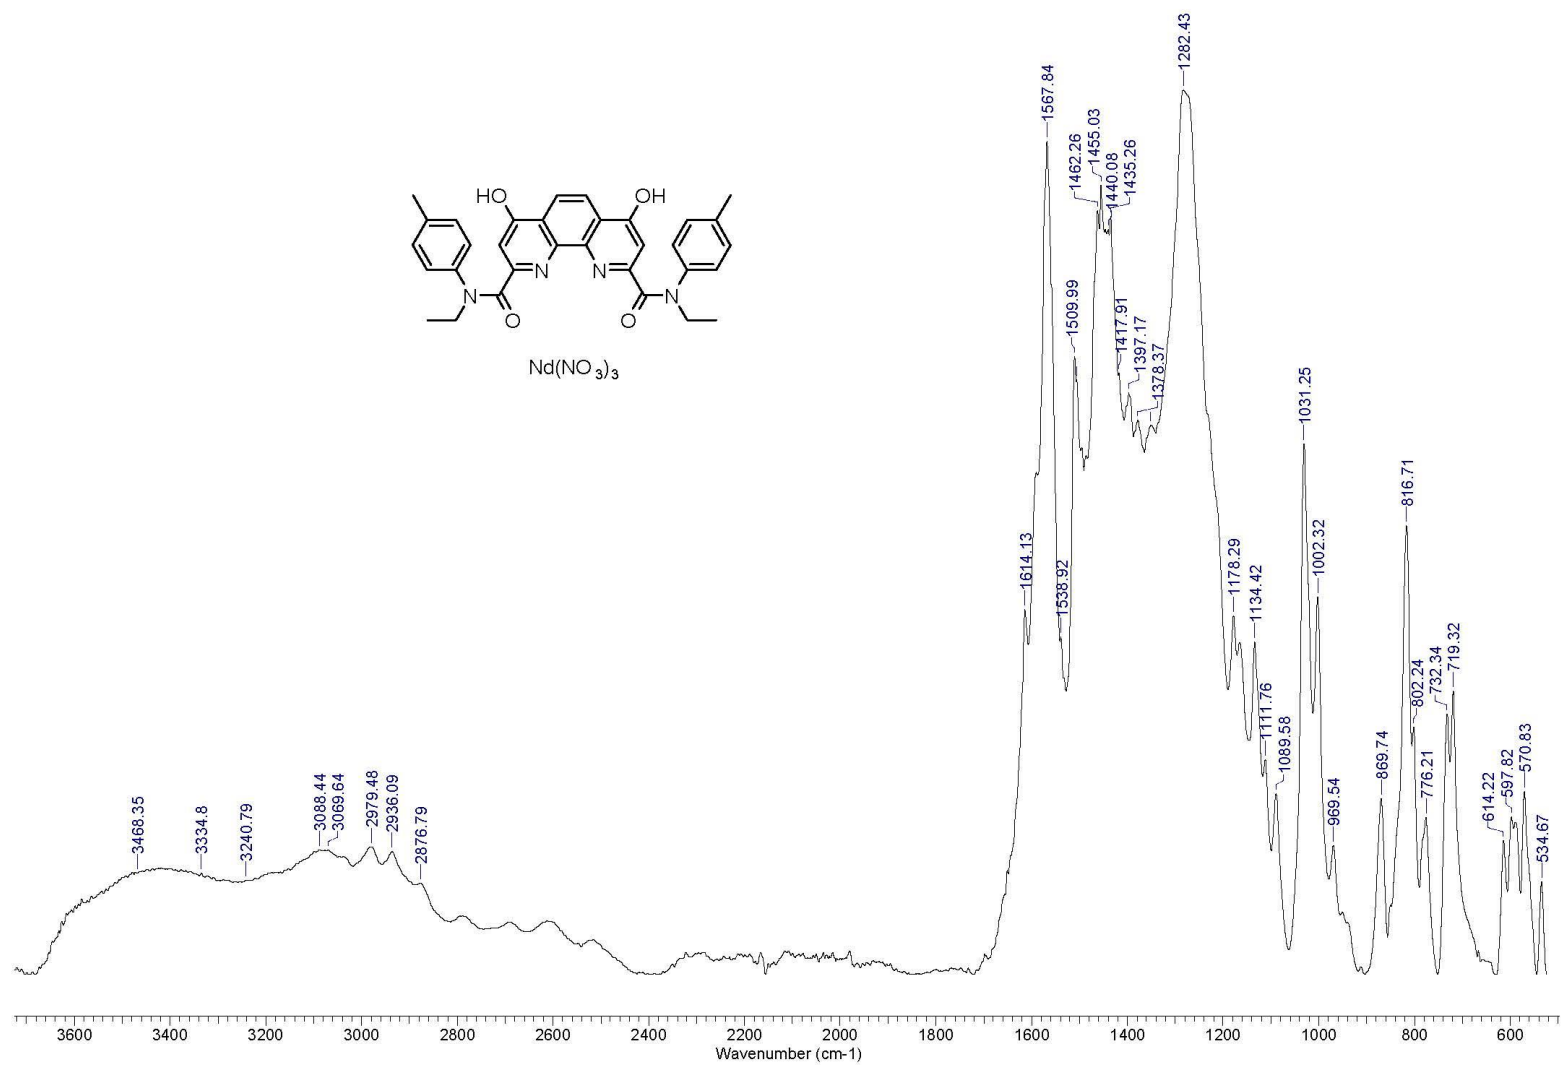

**Figure S29.** Solid-state IR spectrum at 25°C

**N<sup>2</sup>,N<sup>9</sup>-diethyl-4,7-dihydroxy-N<sup>2</sup>,N<sup>9</sup>-di-p-tolyl-1,10-phenanthroline-2,9-dicarboxamide europium trinitrate 5c•Eu(NO<sub>3</sub>)<sub>3</sub>**

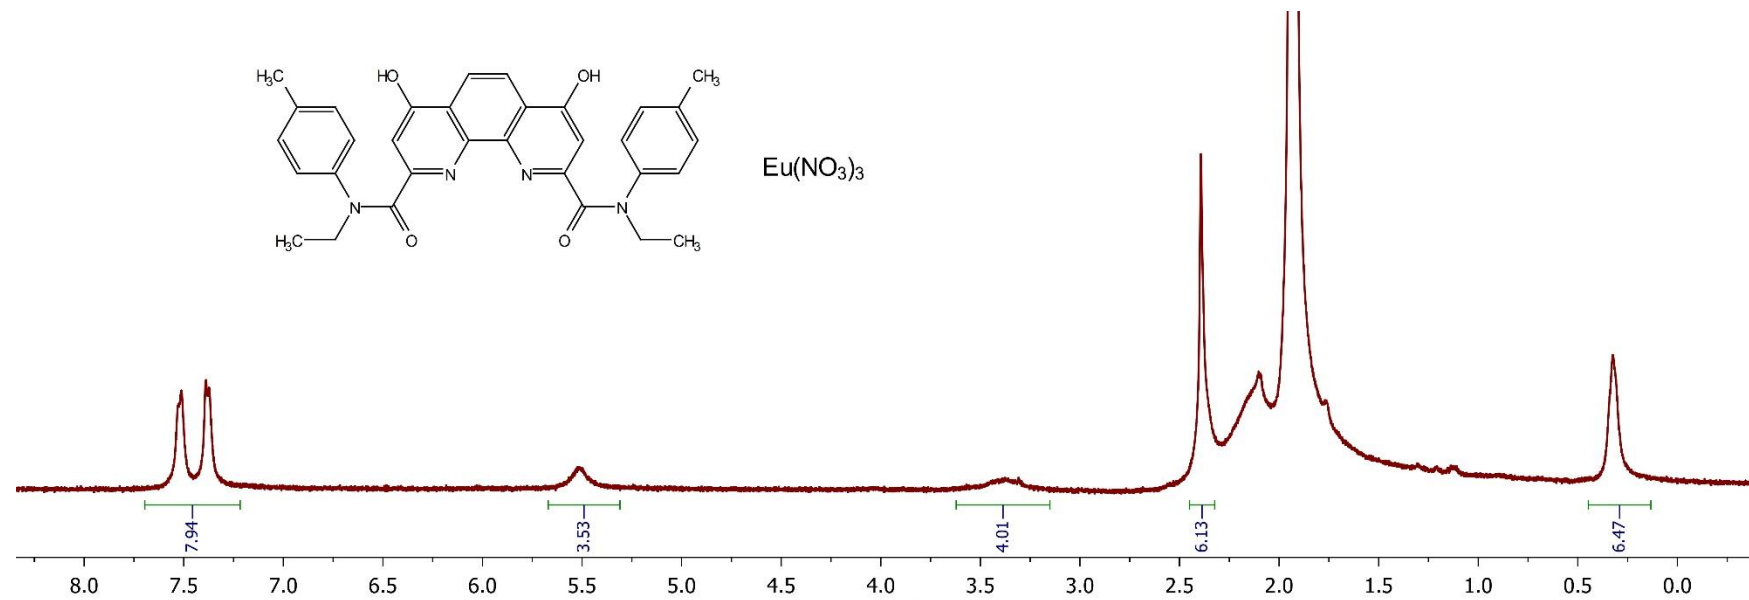

**Figure S30.** <sup>1</sup>H NMR spectrum in CD<sub>3</sub>CN at 60°C

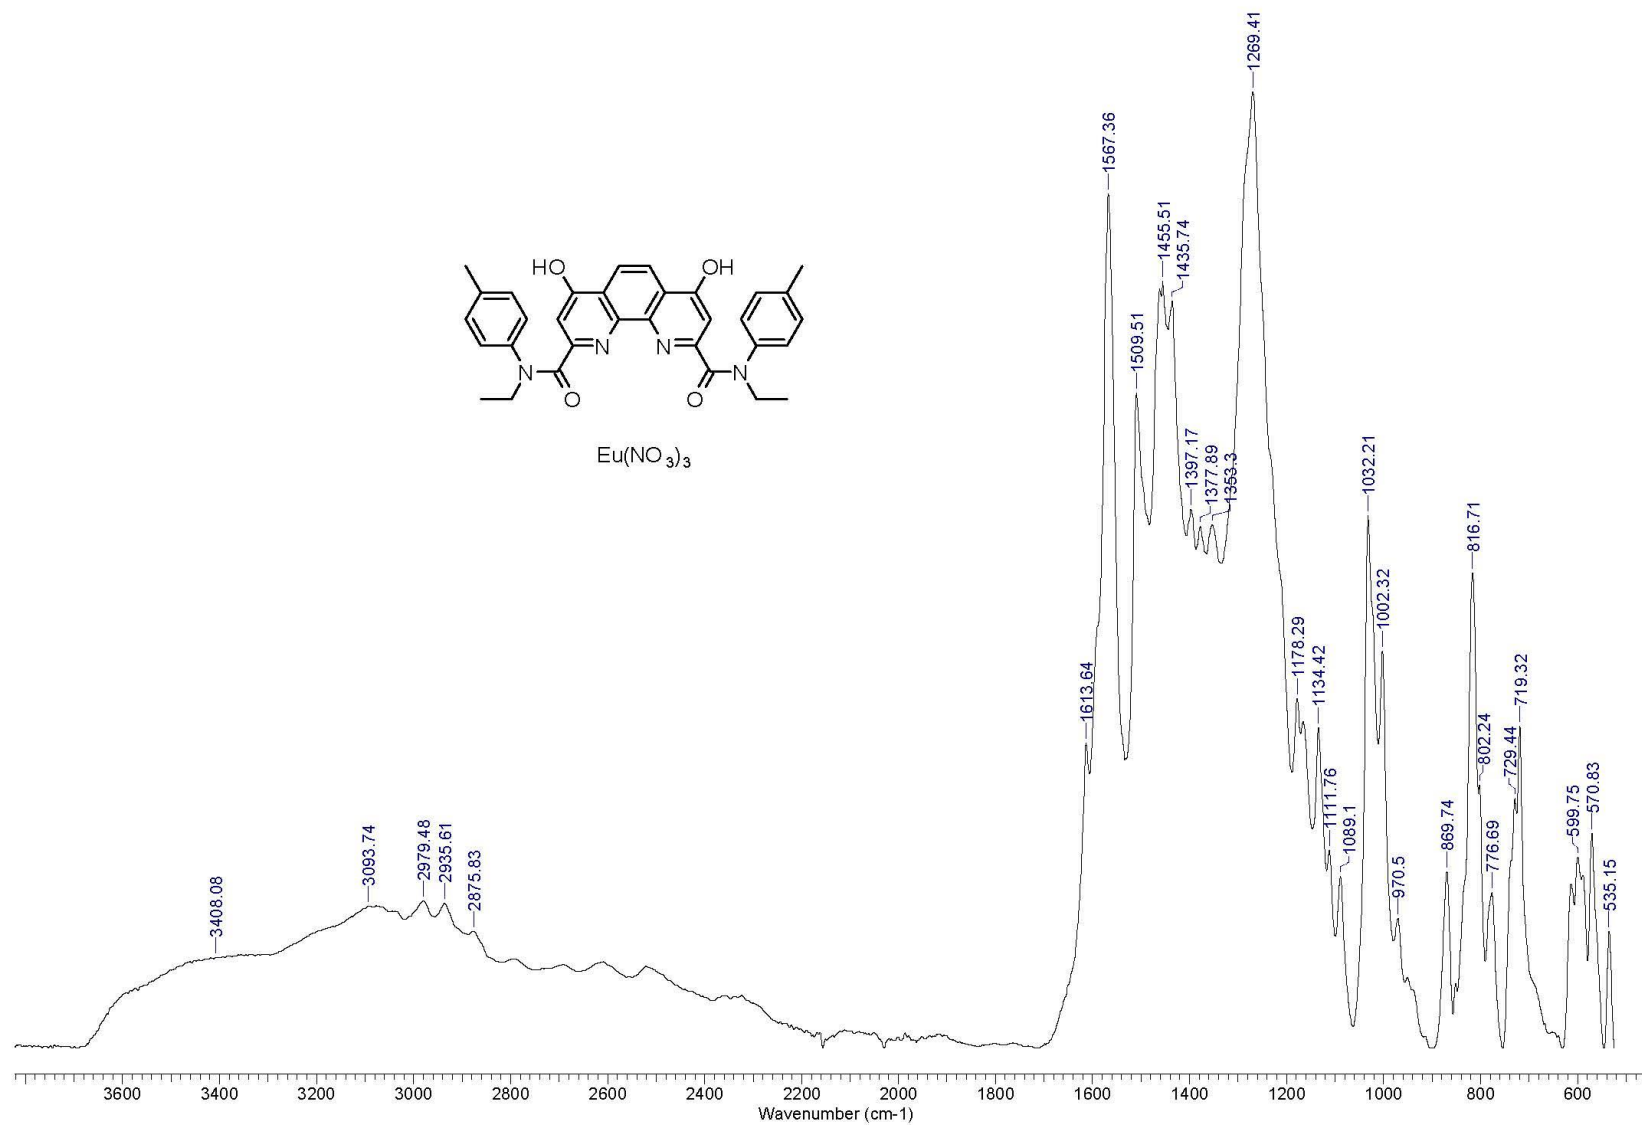

**Figure S31.** Solid-state IR spectrum at 25°C



**N<sup>2</sup>,N<sup>9</sup>-diethyl-4,7-dihydroxy-N<sup>2</sup>,N<sup>9</sup>-di-p-tolyl-1,10-phenanthroline-2,9-dicarboxamide lutetium trinitrate 5c•Lu(NO<sub>3</sub>)<sub>3</sub>**

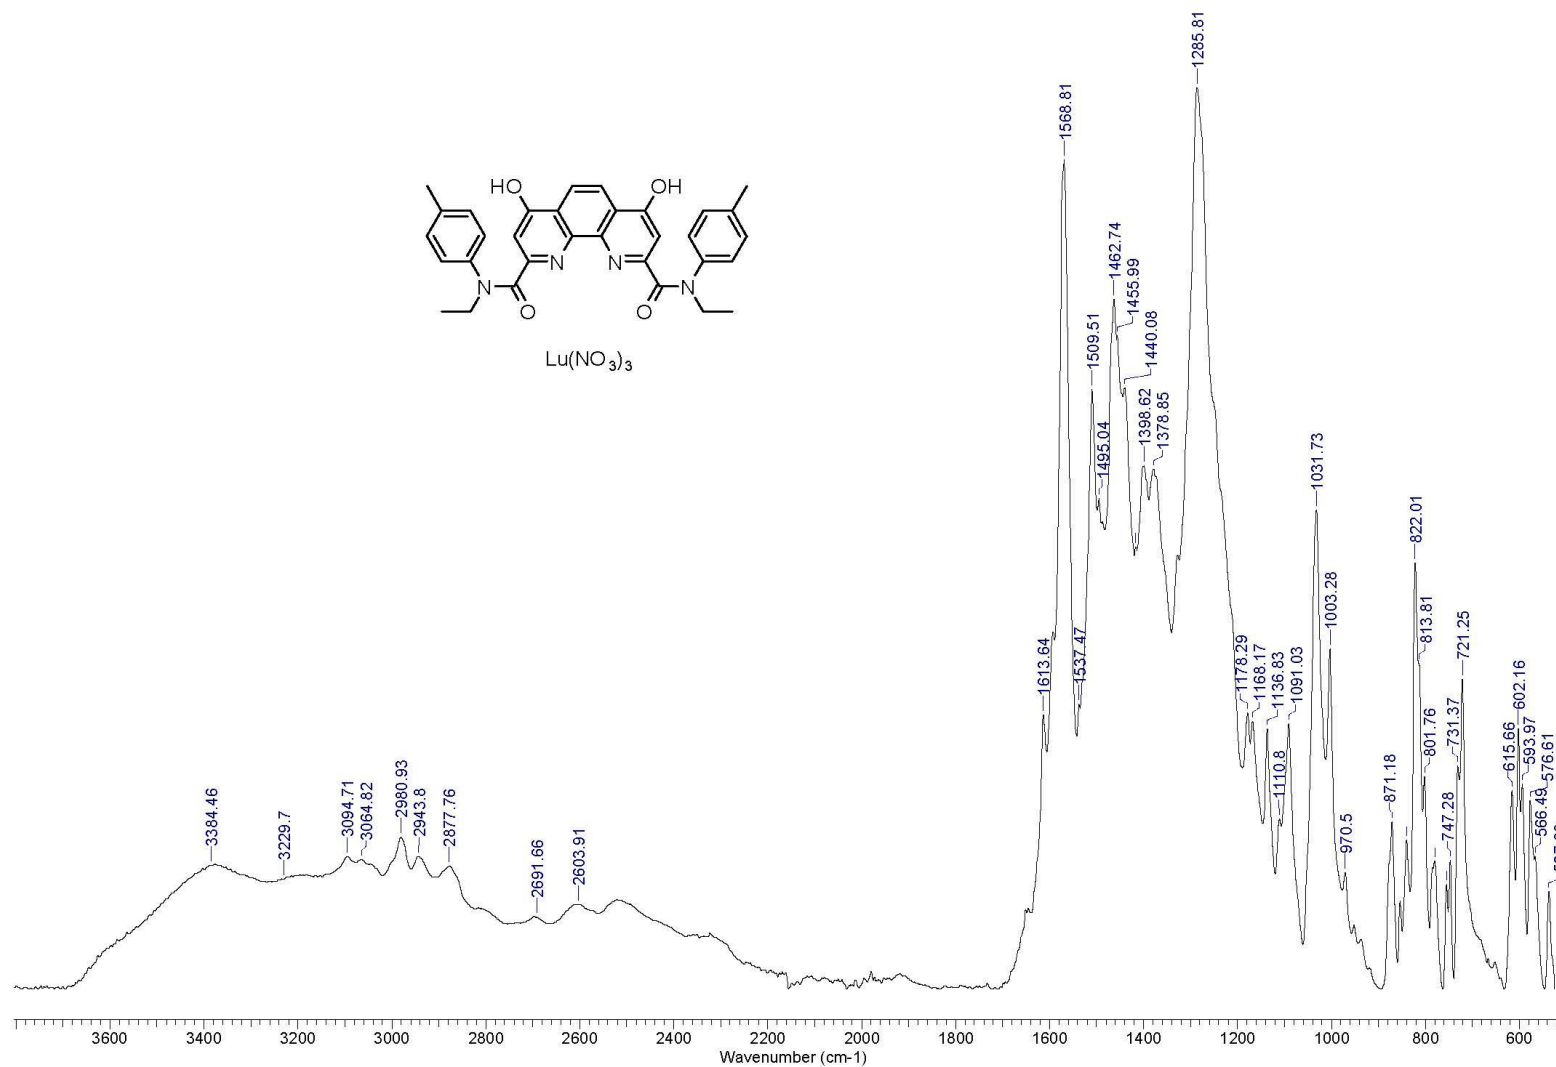

**Figure S32.** Solid-state IR spectrum at 25°C

## 2. NMR spectra of hydrolysis experiments

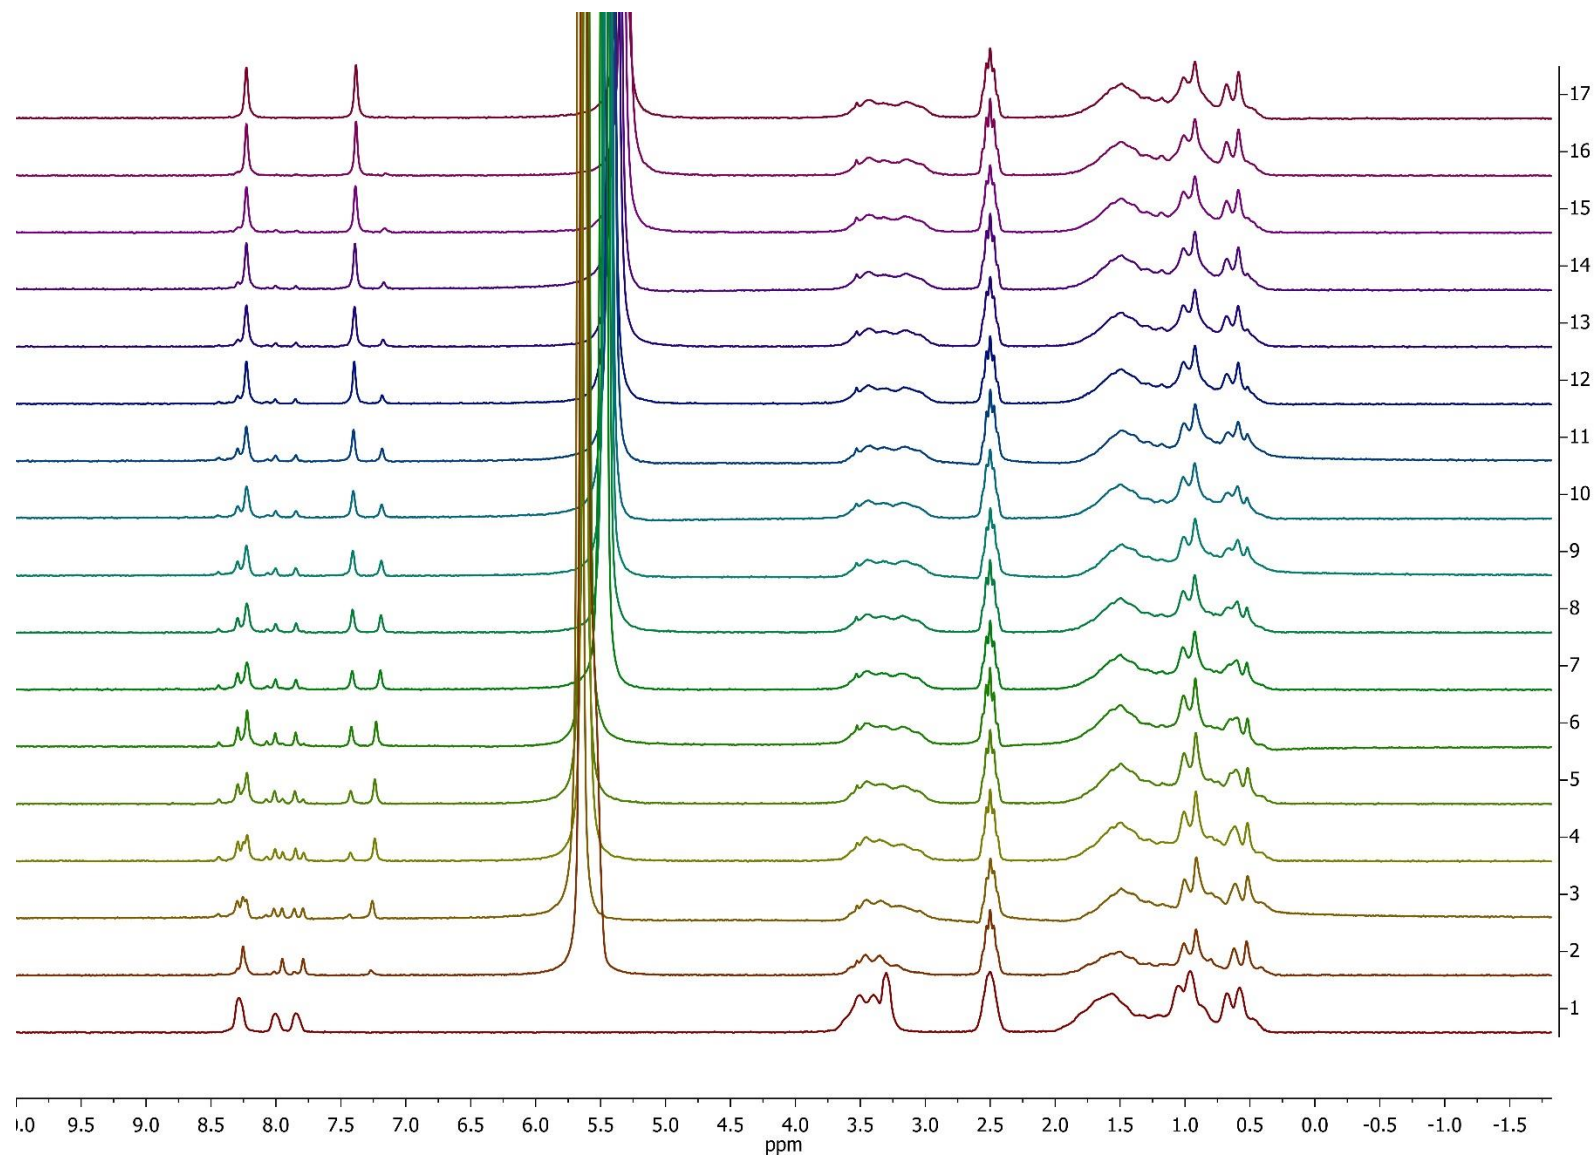

**Figure S33.** Hydrolysis of **1a** (1) after 0.3h (2), 1.5h (3), 2h (4), 2.5h (5), 3h (6), 3.5h (7), 4h (8), 4.5h(9), 5h (10), 5.5h (11), 8.3h (12), 9.2h (13), 10.2h (14), 12.2h (15), 16.2h (16), 20h (17)

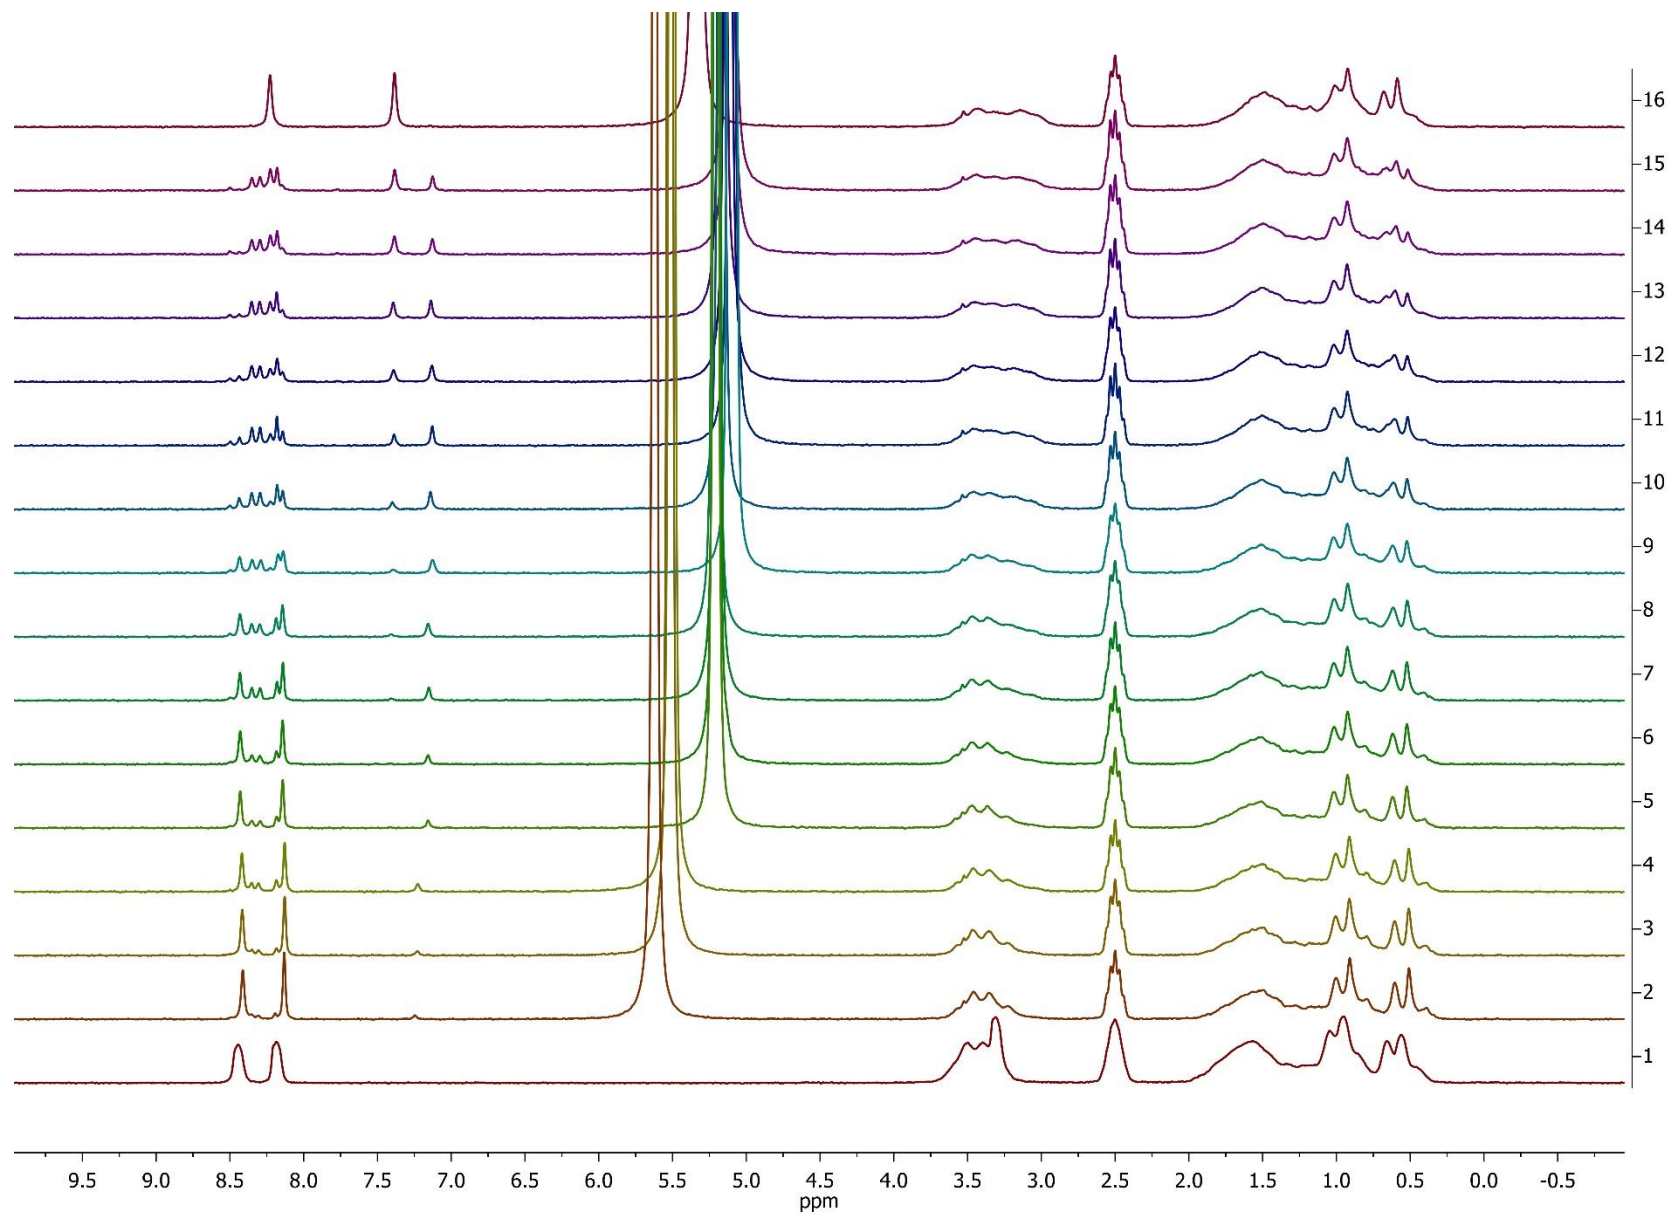

**Figure S34.** Hydrolysis of **3a** (1) after 1.5h (2), 2h (3), 3h (4), 4h (5), 5h (6), 6.5h (7), 7.5h (8), 9.5h(9), 13.5h (10), 16.5h (11), 19.5h (12), 22.5h (13), 26.5h (14), 30.5h (15), 72h (16)

### 3. NMR titration

$N^2,N^2,N^9,N^9$ -tetrabutyl-4,7-difluoro-1,10-phenanthroline-2,9-dicarboxamide (**1a**) with neodymium trinitrate

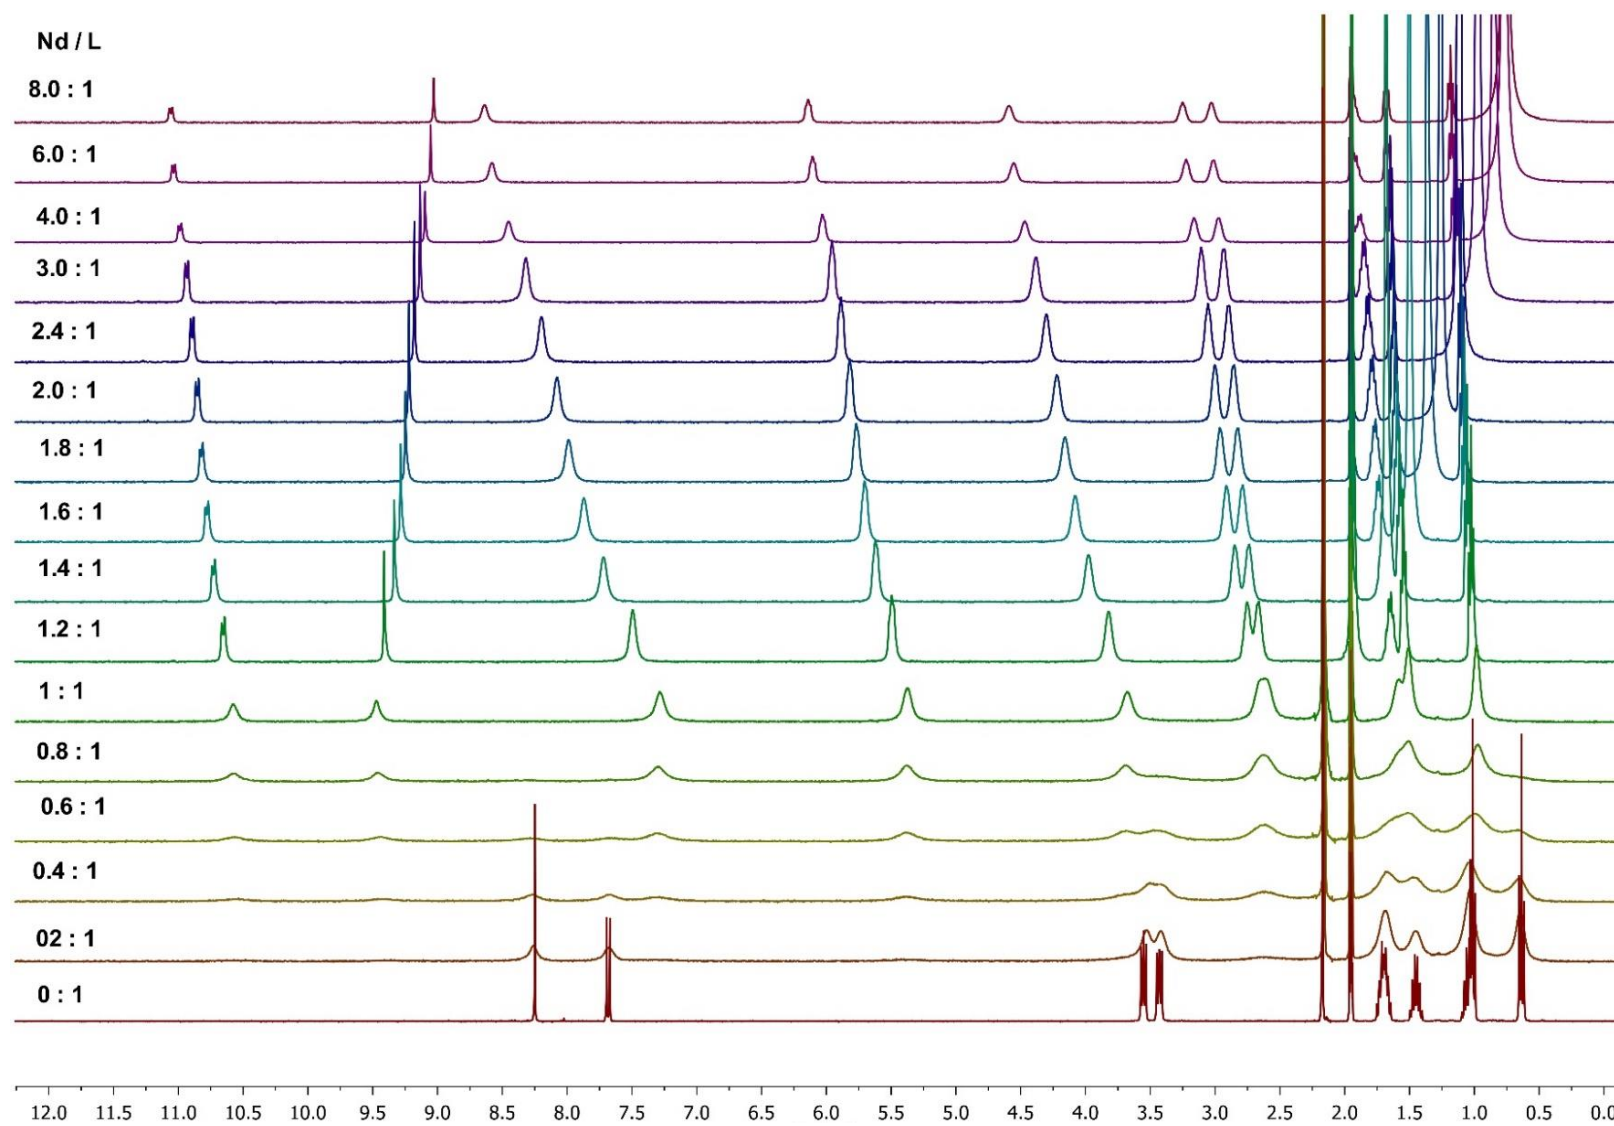

**Figure S35.** NMR titration of **1a** with  $\text{Nd}(\text{NO}_3)_3 \cdot 6\text{H}_2\text{O}$  in  $\text{CD}_3\text{CN}$

**$N^2,N^2,N^9,N^9$ -tetrabutyl-4,7-difluoro-1,10-phenanthroline-2,9-dicarboxamide (1a) with lutetium trinitrate**

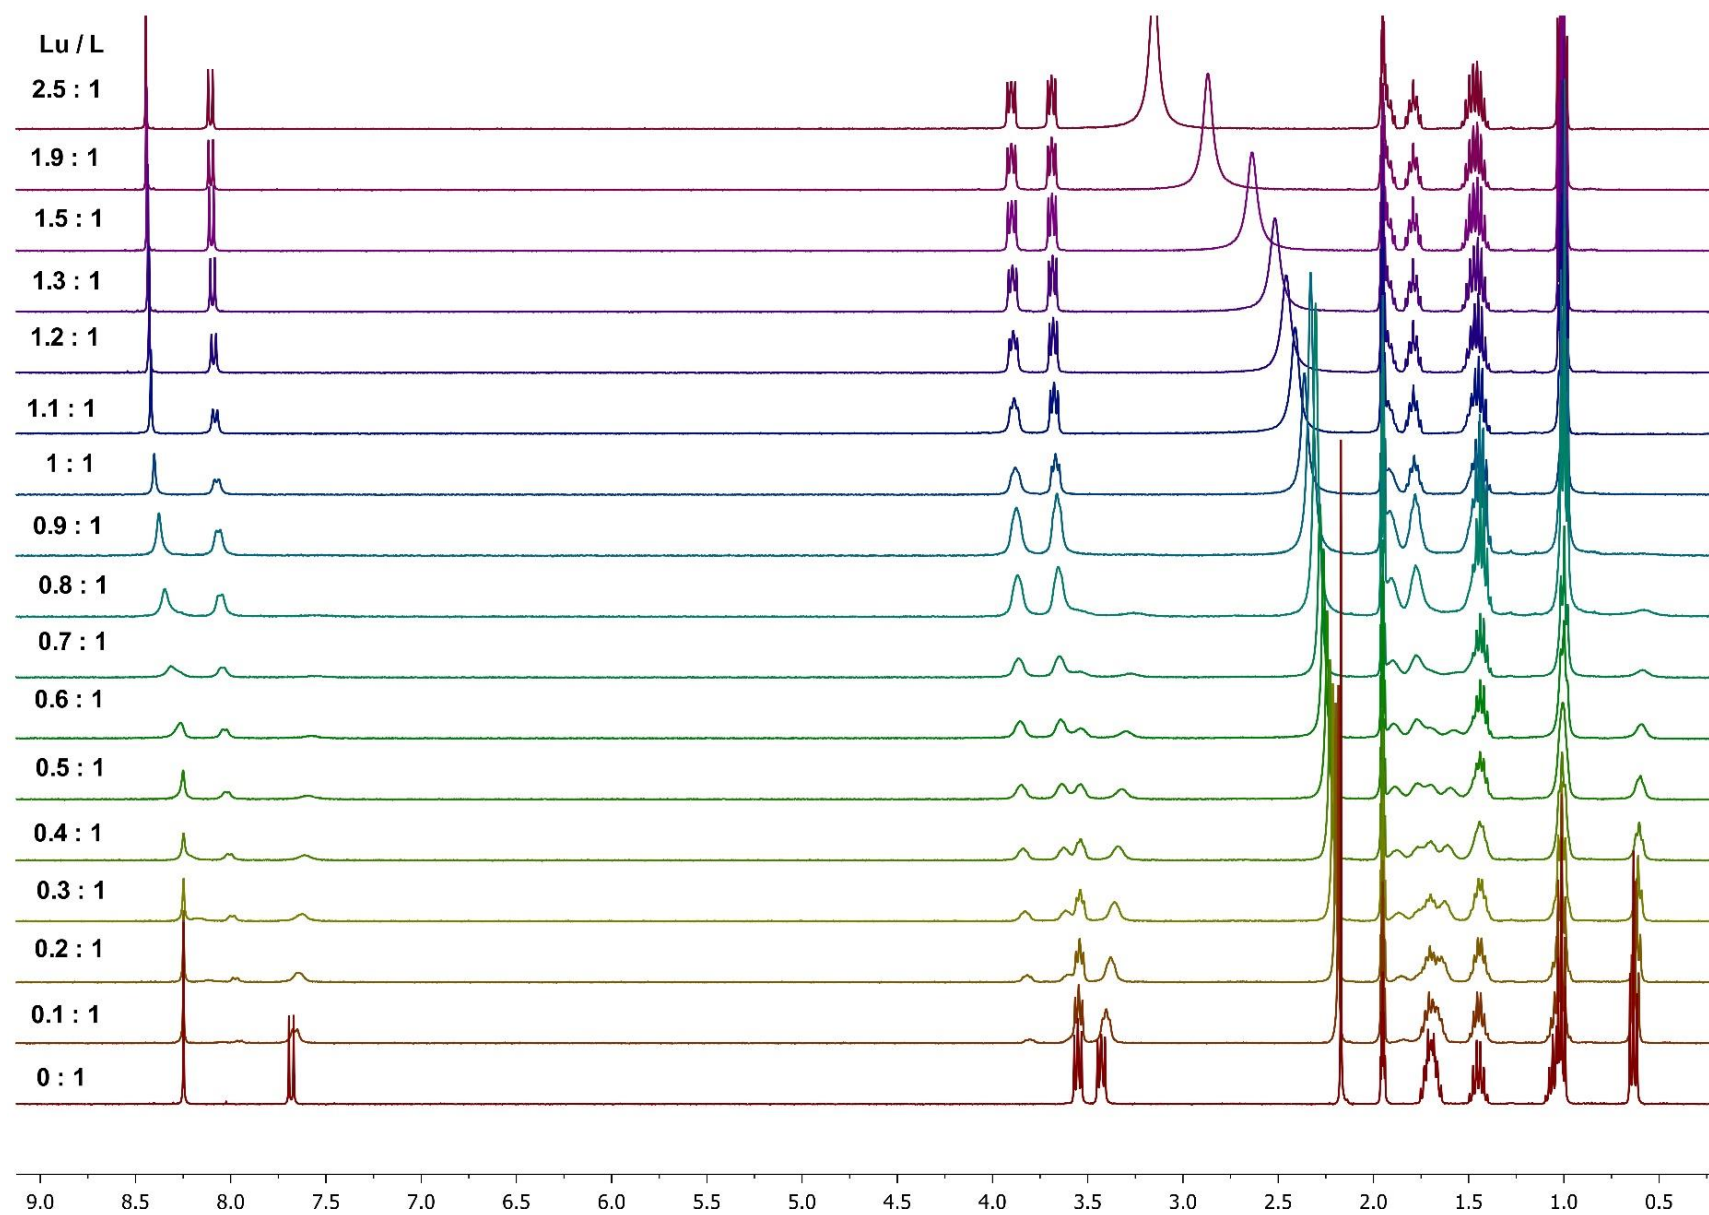

**Figure S36.** NMR titration of **1a** with Lu(NO<sub>3</sub>)<sub>3</sub>·6H<sub>2</sub>O in CD<sub>3</sub>CN

**$N^2,N^2,N^9,N^9$ -tetrabutyl-7-fluoro-4-oxo-1,4-dihydro-1,10-phenanthroline-2,9-dicarboxamide (2a) with neodymium trinitrate**

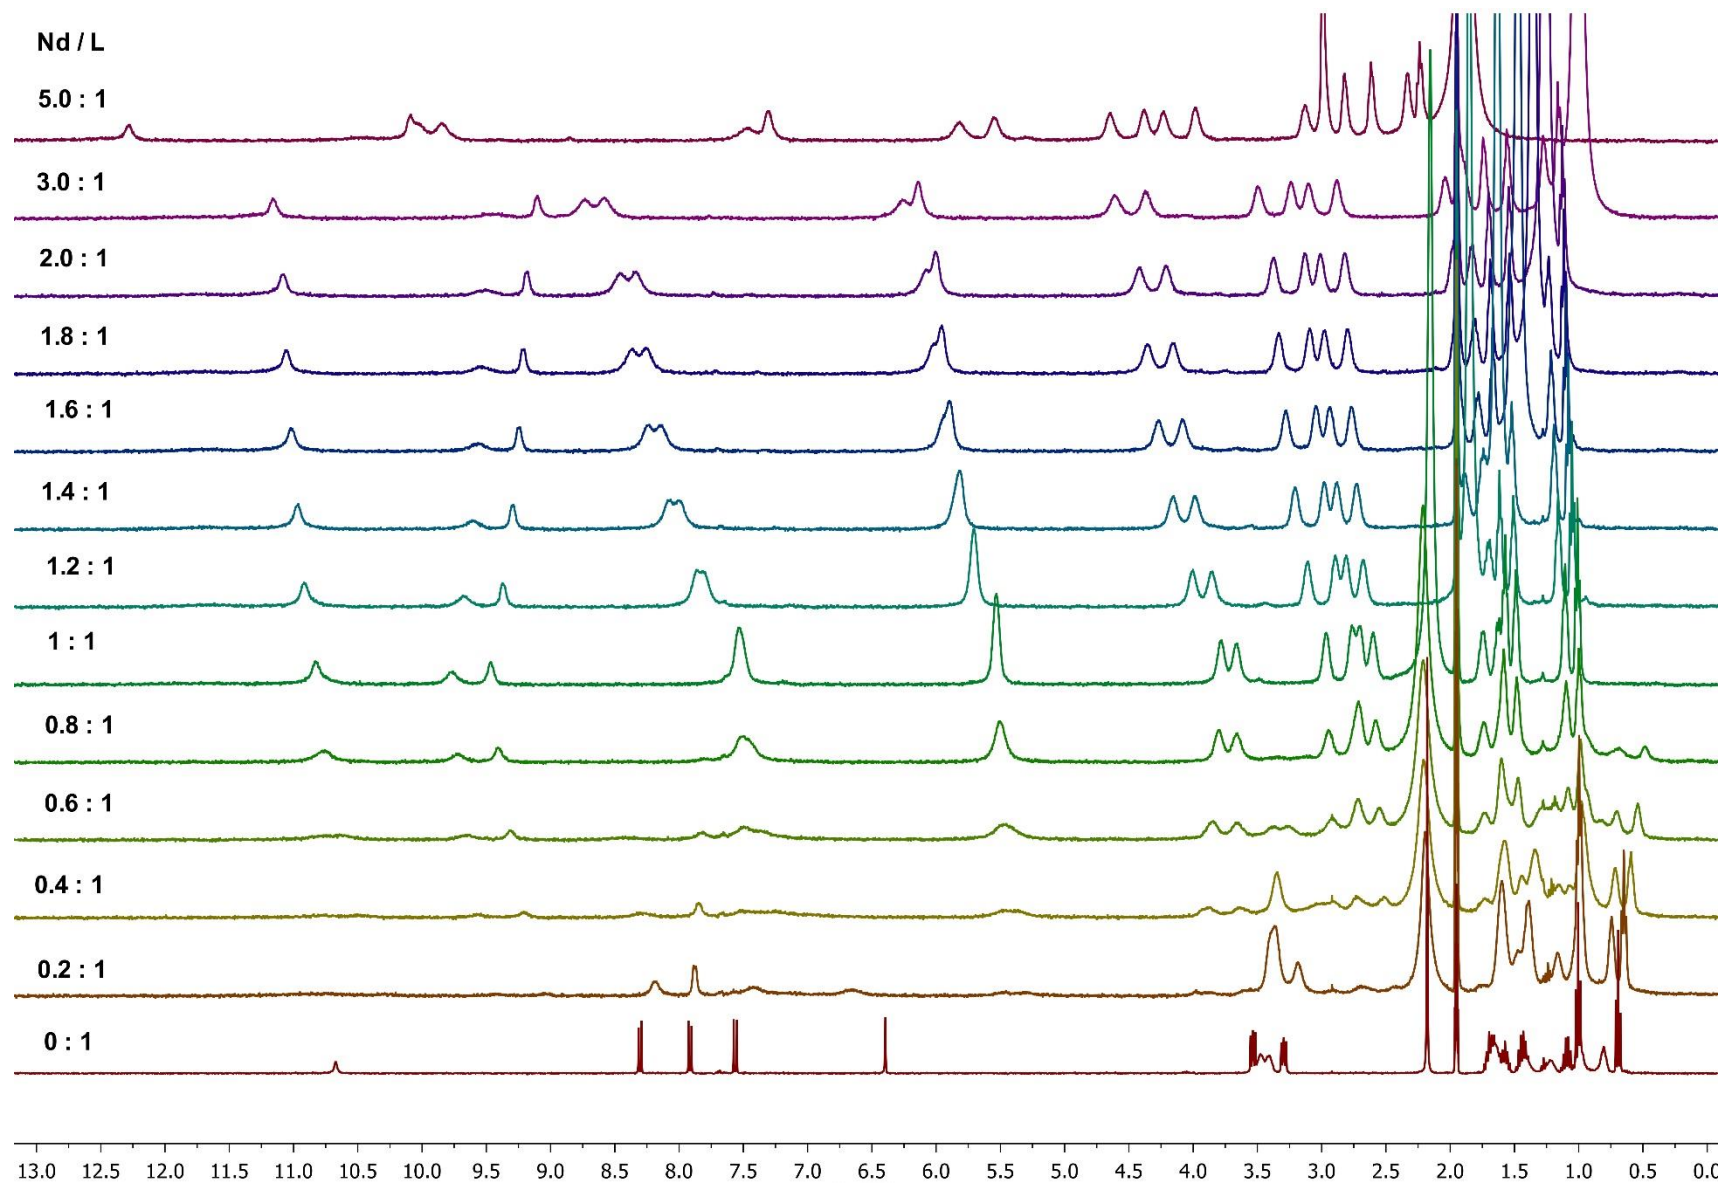

**Figure S37.** NMR titration of **2a** with  $Nd(NO_3)_3 \cdot 6H_2O$  in  $CD_3CN$

**$N^2, N^2, N^9, N^9$ -tetrabutyl-7-fluoro-4-oxo-1,4-dihydro-1,10-phenanthroline-2,9-dicarboxamide (2a) with lutetium trinitrate**

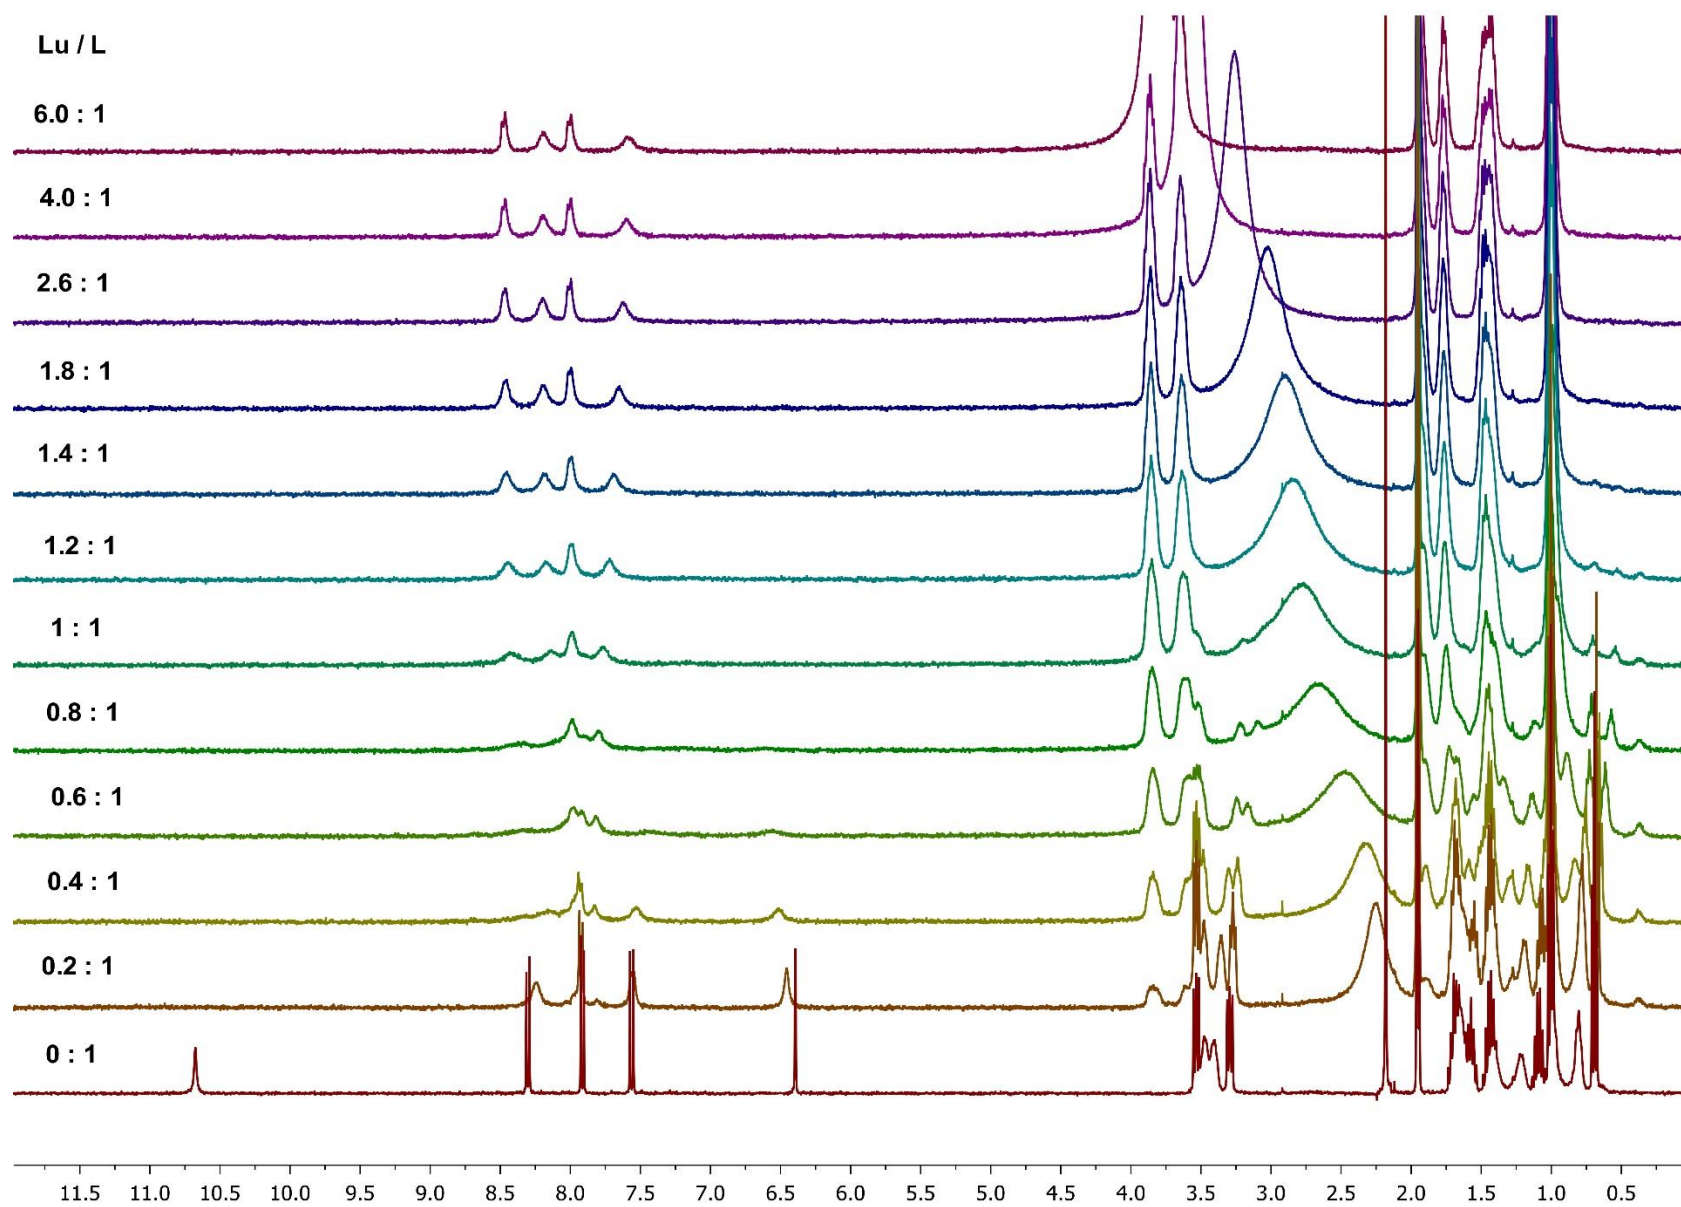

**Figure S38.** NMR titration of **2a** with Lu(NO<sub>3</sub>)<sub>3</sub>·6H<sub>2</sub>O in CD<sub>3</sub>CN

**$N^2,N^9$ -bis(p-tolyl)-4,7-difluoro- $N^2,N^9$ -diethyl-1,10-phenanthroline-2,9-dicarboxamide (**1c**) with lanthanum trinitrate**

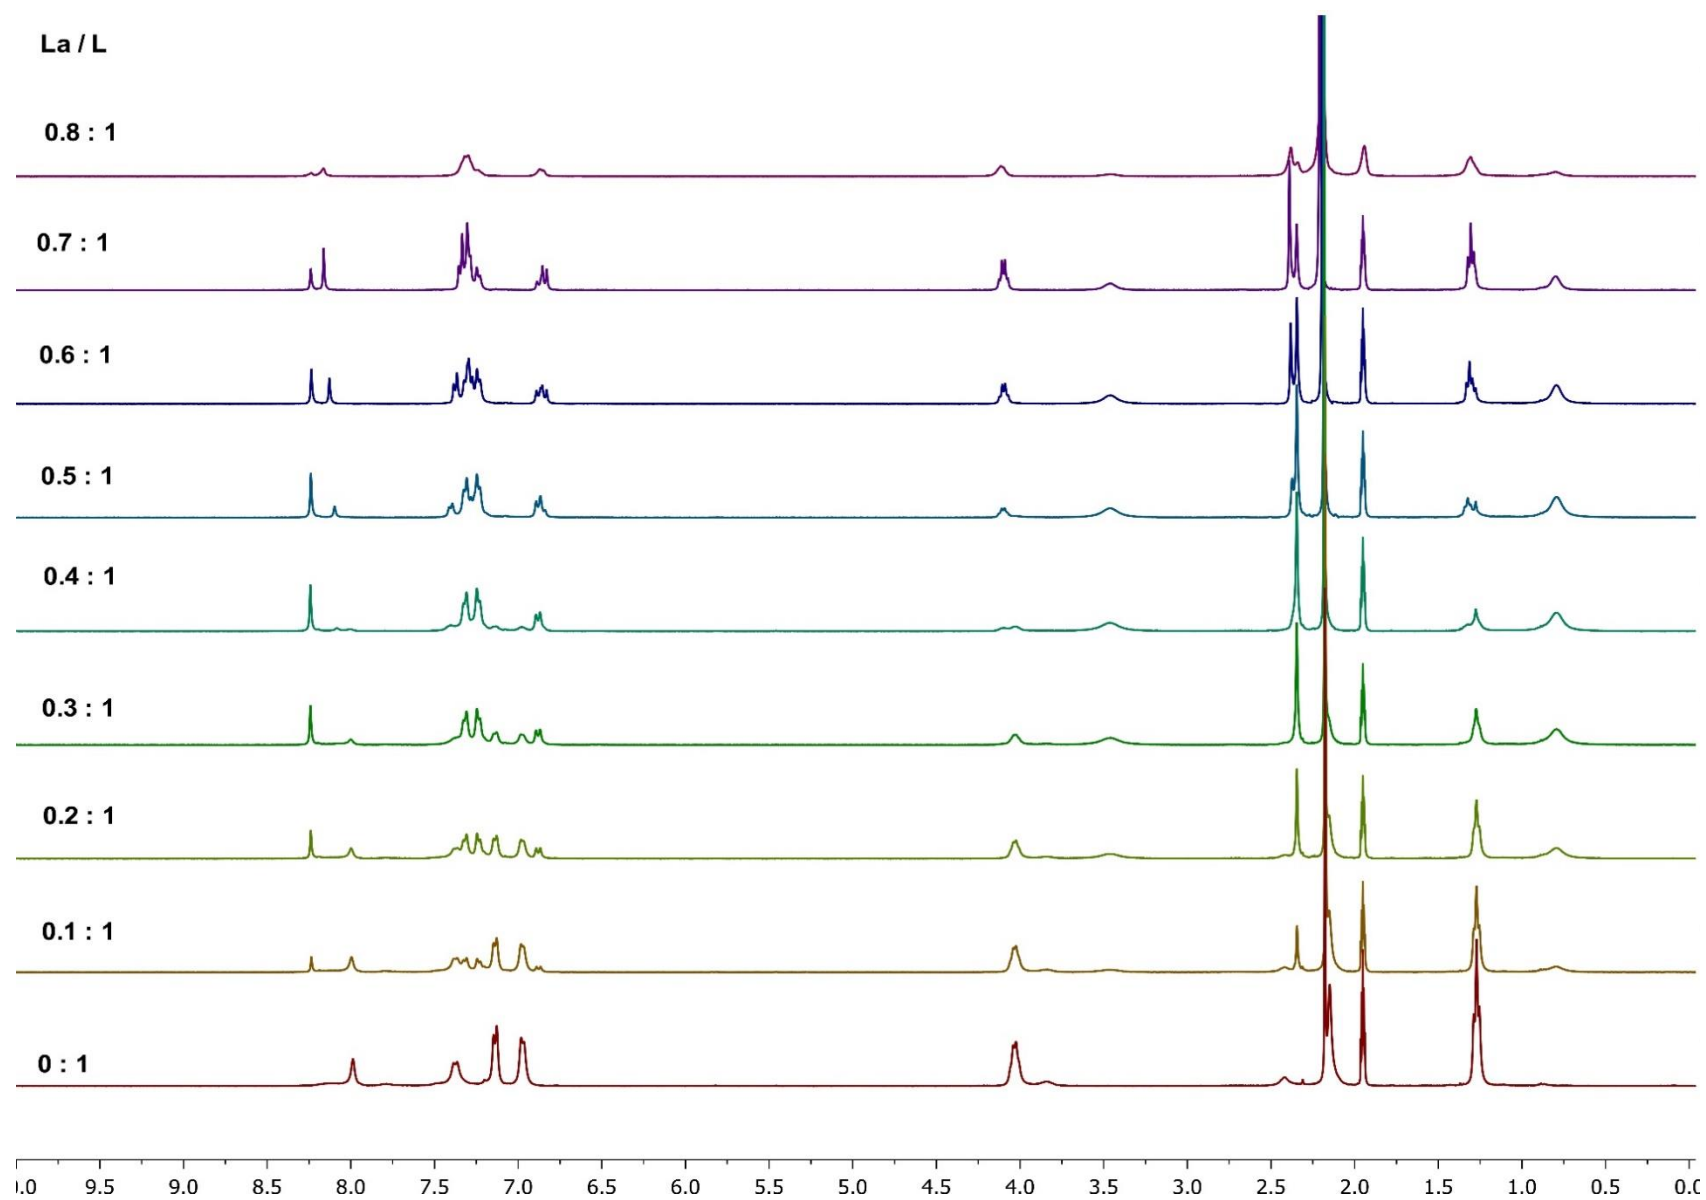

**Figure S39.** NMR titration of **1c** with  $\text{La}(\text{NO}_3)_3 \cdot 6\text{H}_2\text{O}$  in  $\text{CD}_3\text{CN}$



**$N^2,N^9$ -bis(p-tolyl)-4,7-difluoro- $N^2,N^9$ -diethyl-1,10-phenanthroline-2,9-dicarboxamide (**1c**) with neodymium trinitrate**

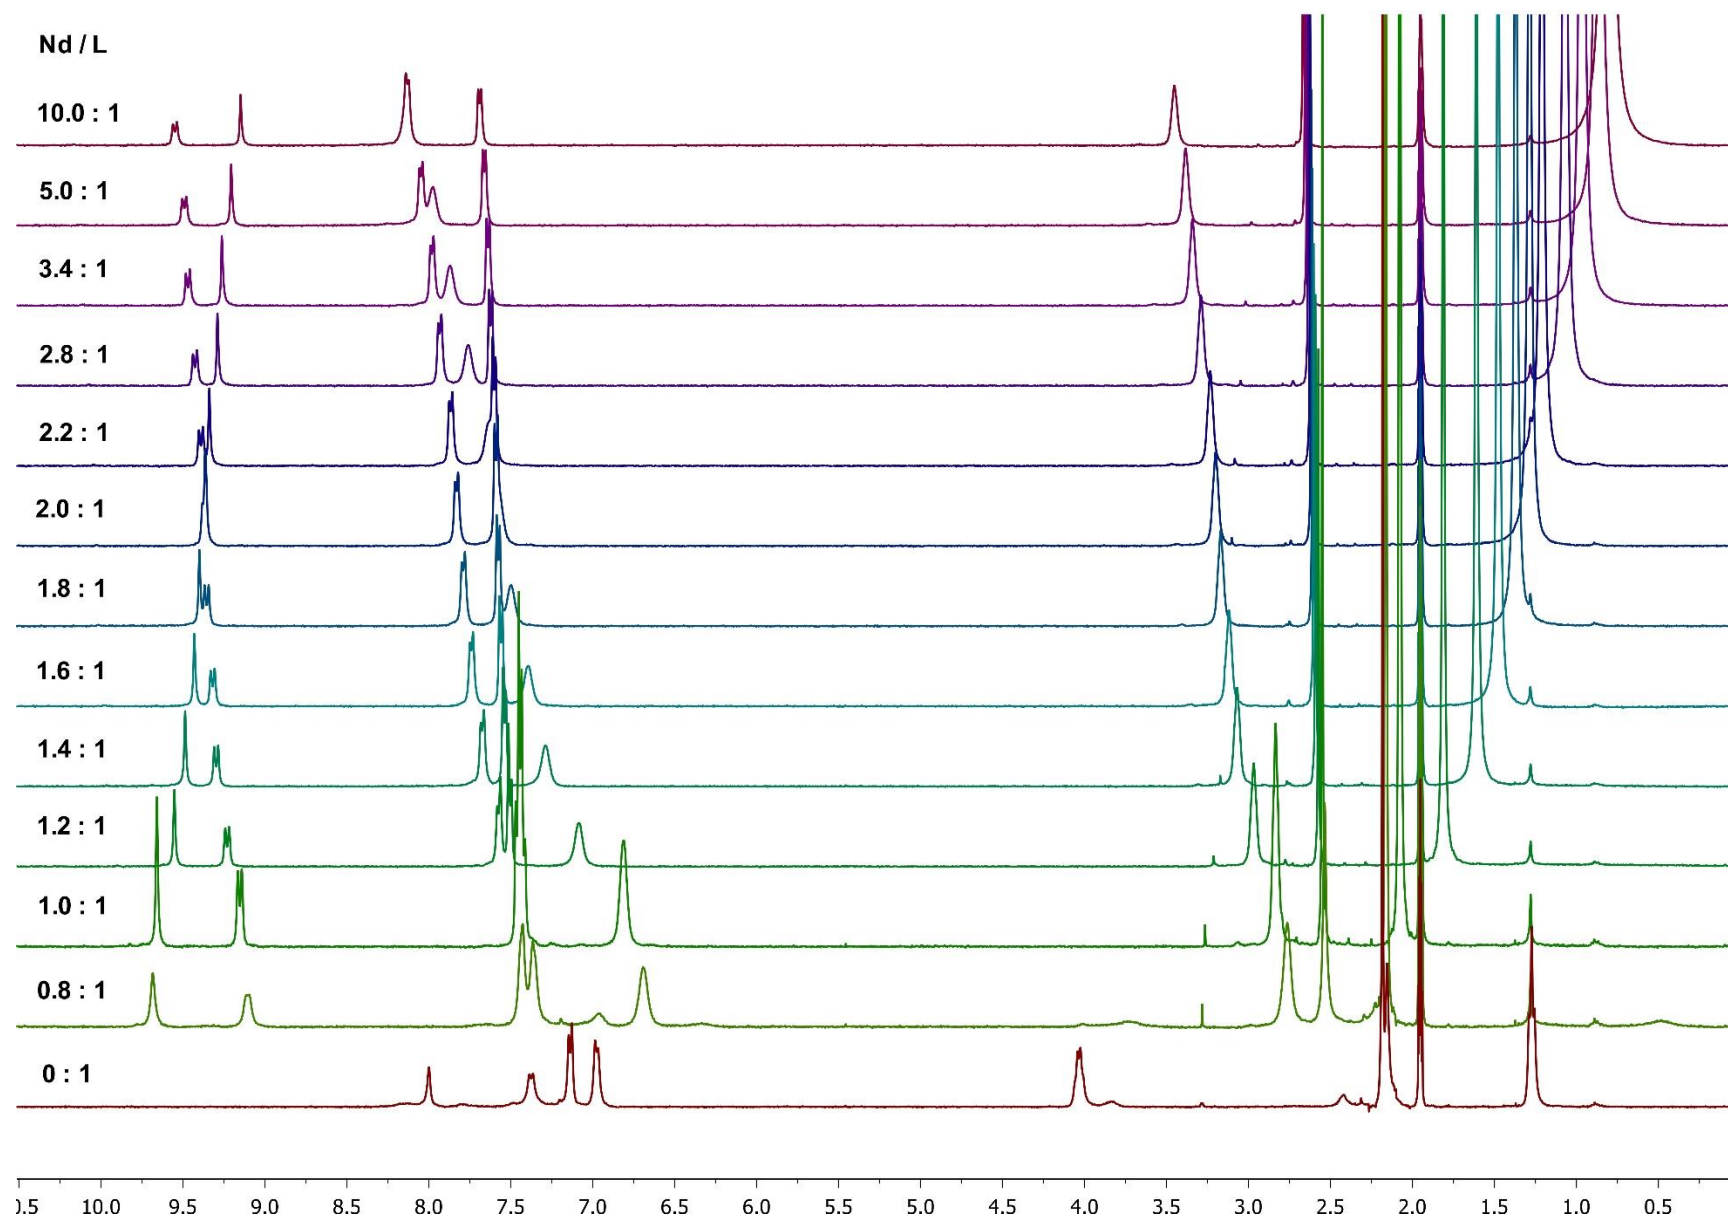

**Figure S40.** NMR titration of **1c** with  $Nd(NO_3)_3 \cdot 6H_2O$  in  $CD_3CN$

**$N^2,N^9$ -bis(p-tolyl)-4,7-difluoro- $N^2,N^9$ -diethyl-1,10-phenanthroline-2,9-dicarboxamide (**1c**) with europium trinitrate**

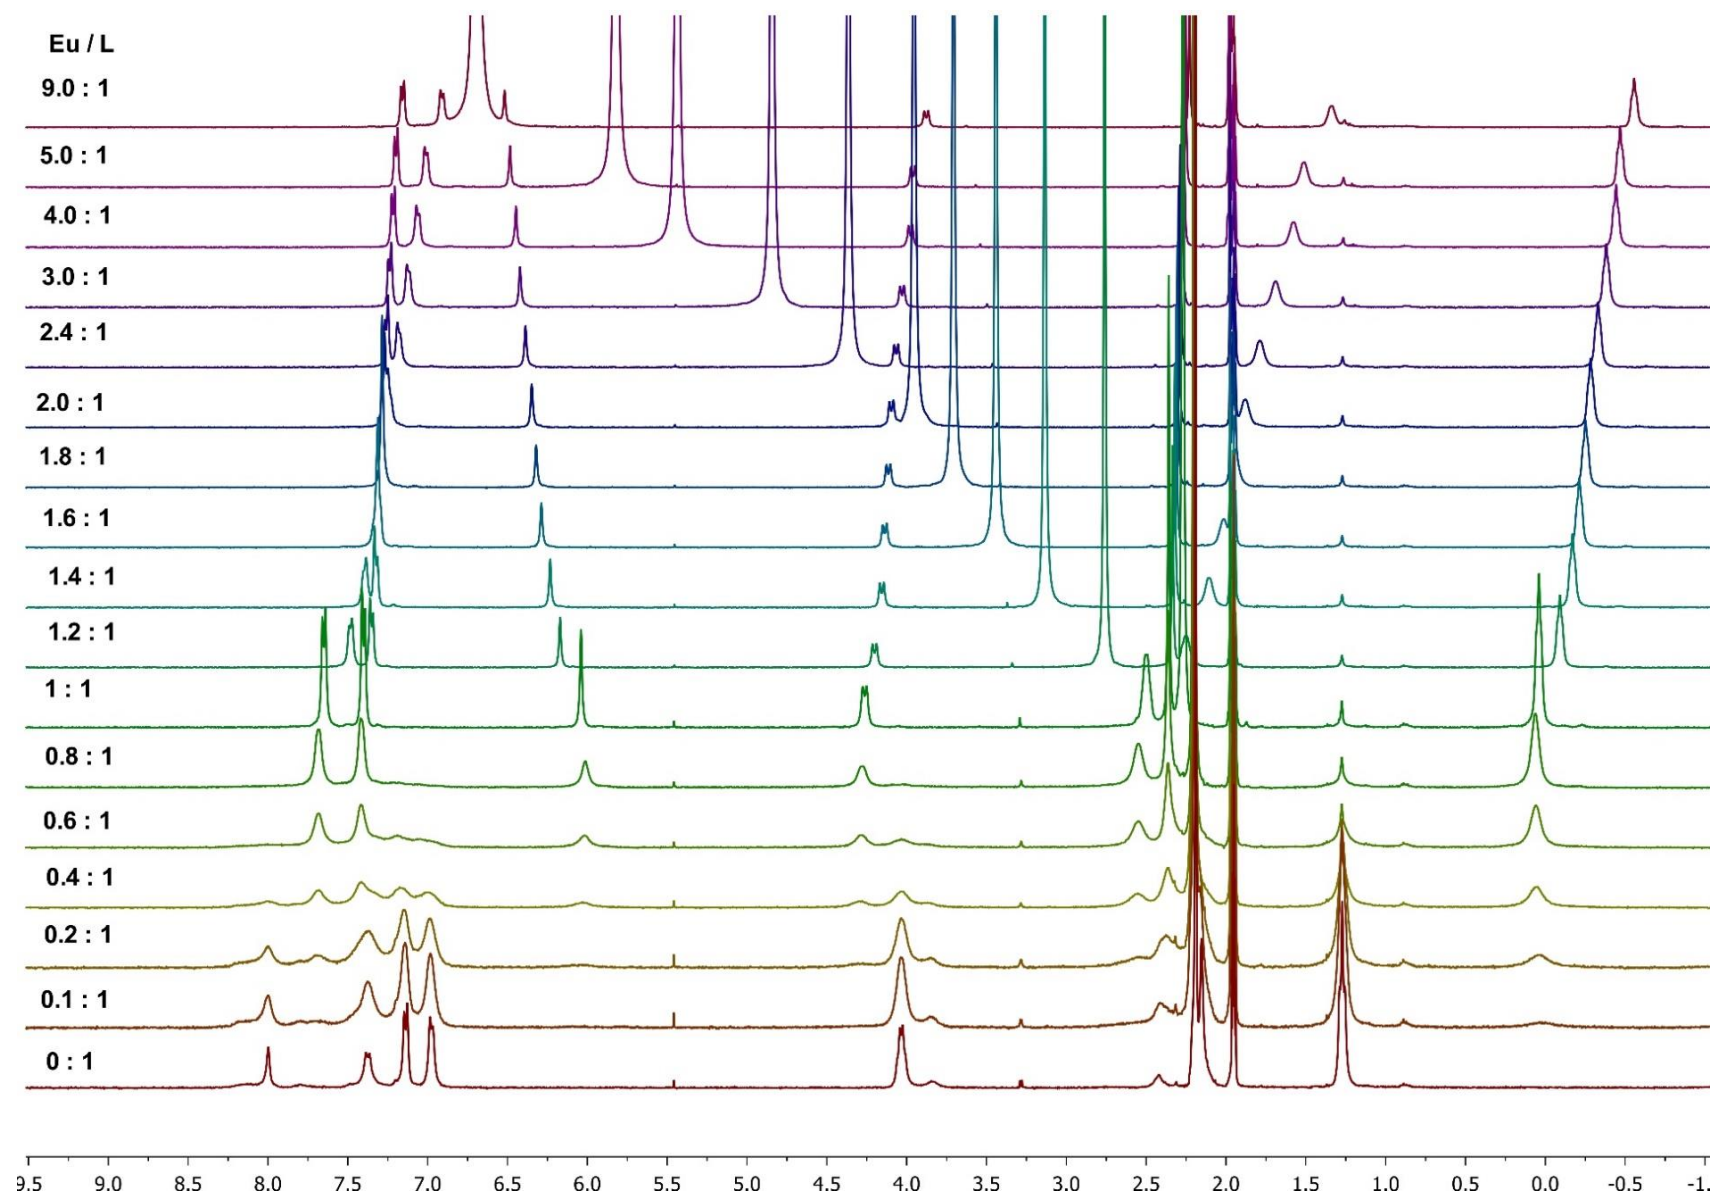

**Figure S41.** NMR titration of **1c** with  $\text{Eu}(\text{NO}_3)_3 \cdot 6\text{H}_2\text{O}$  in  $\text{CD}_3\text{CN}$

**$N^2,N^9$ -bis(p-tolyl)-4,7-difluoro- $N^2,N^9$ -diethyl-1,10-phenanthroline-2,9-dicarboxamide (**1c**) with lutetium trinitrate**

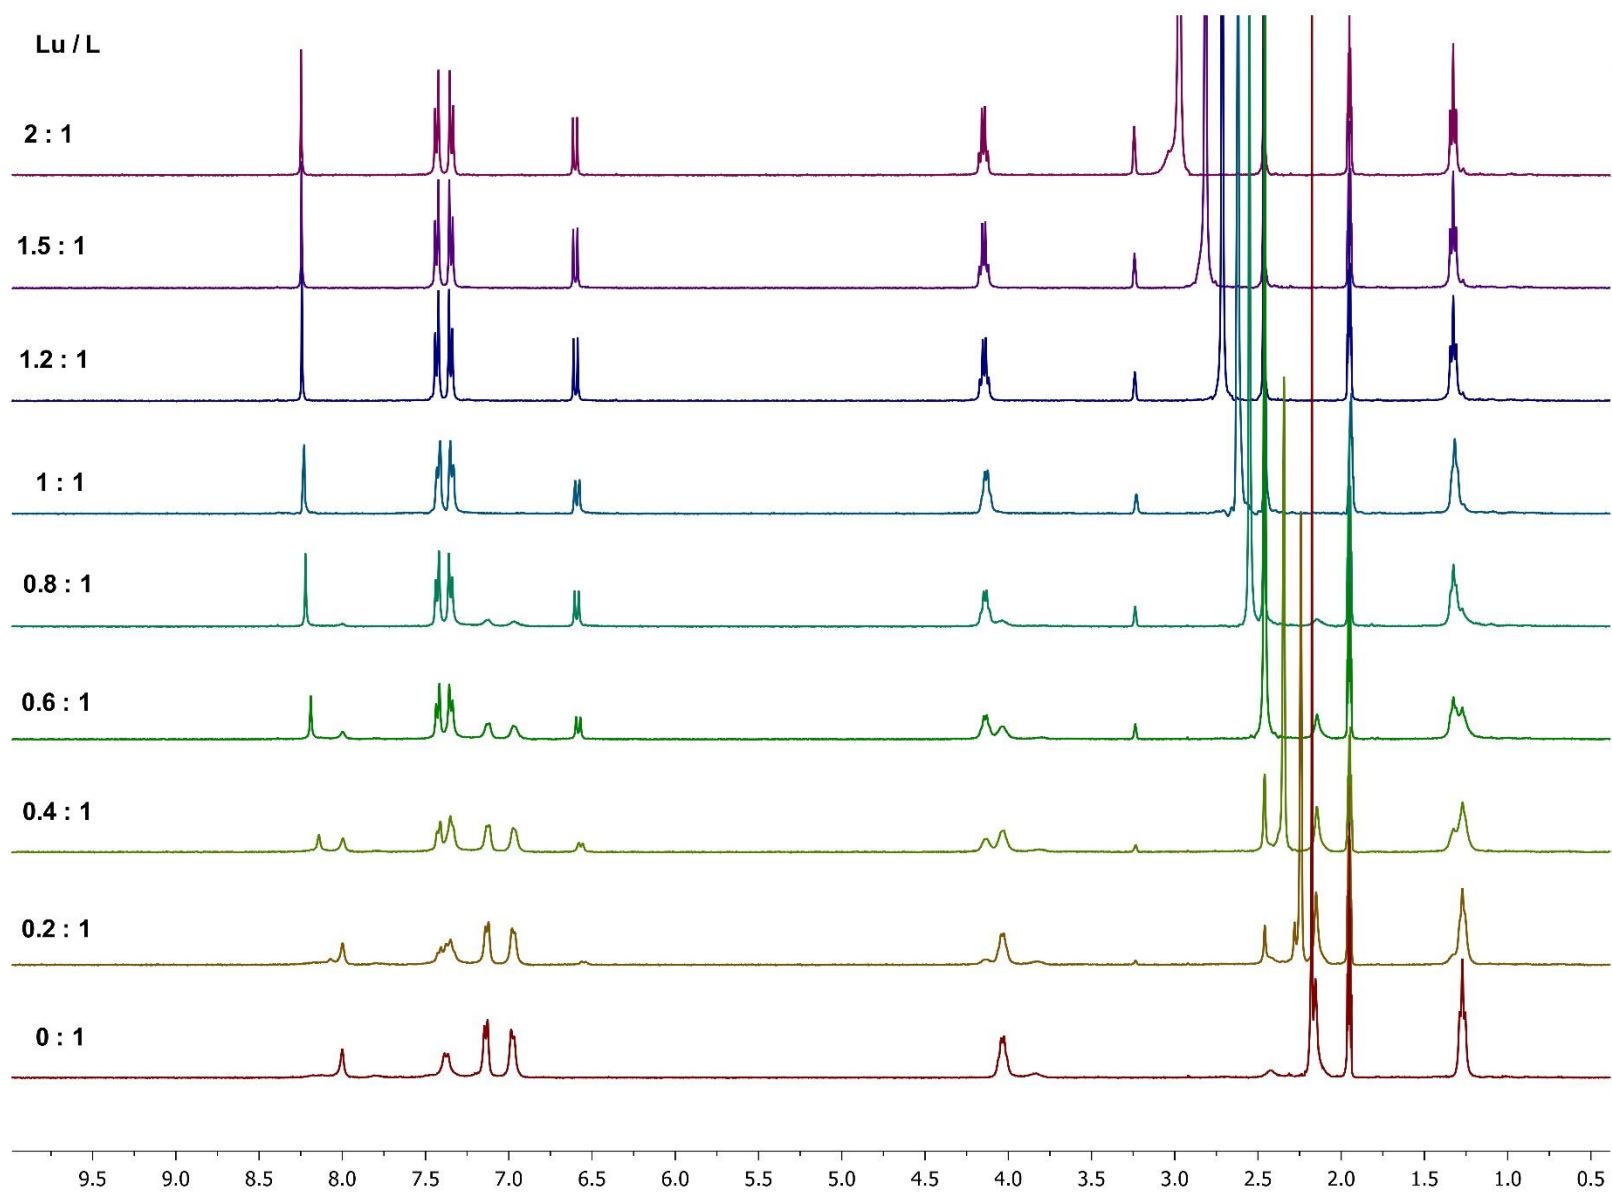

**Figure S42.** NMR titration of **1c** with Lu(NO<sub>3</sub>)<sub>3</sub>·6H<sub>2</sub>O in CD<sub>3</sub>CN

**$N^2,N^9$ -bis(p-tolyl)- $N^2,N^9$ -diethyl-7-fluoro-4-oxo-1,4-dihydro-1,10-phenanthroline-2,9-dicarboxamide (2c) with lanthanum trinitrate**

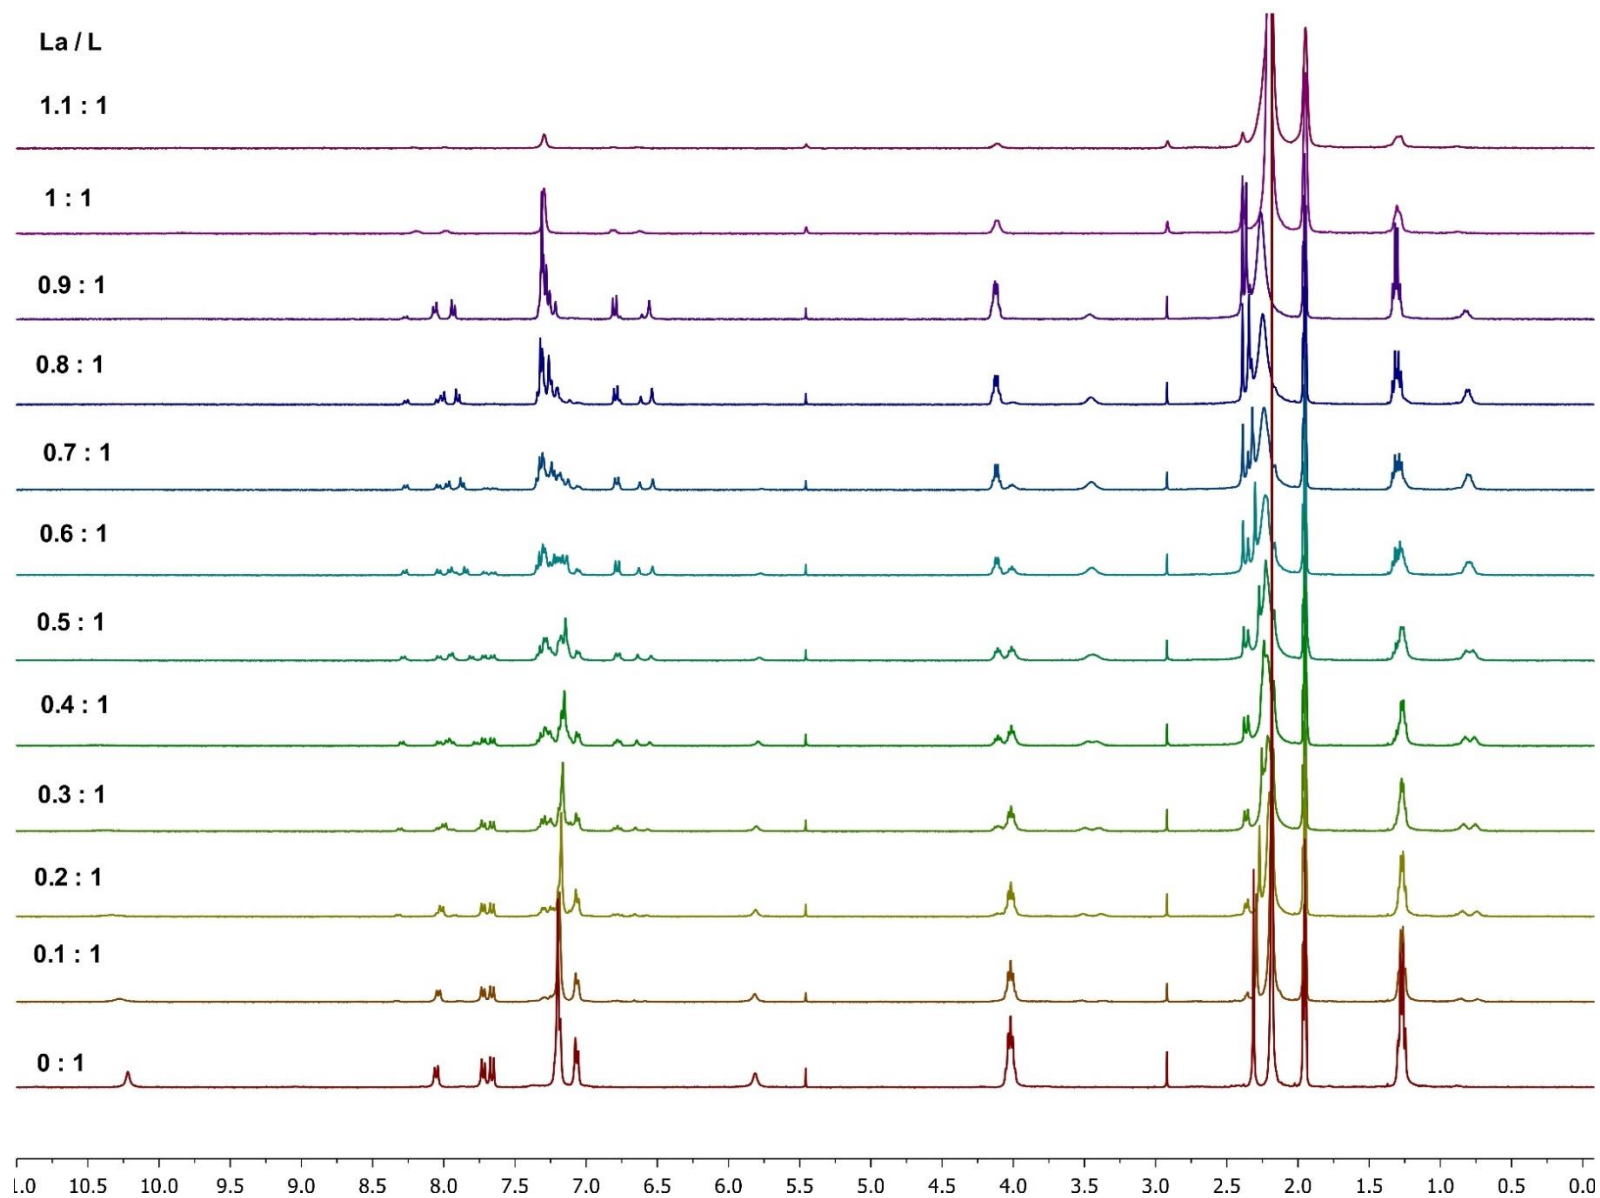

**Figure S43.** NMR titration of **2c** with  $\text{La}(\text{NO}_3)_3 \cdot 6\text{H}_2\text{O}$  in  $\text{CD}_3\text{CN}$

**N<sup>2</sup>,N<sup>9</sup>-bis(p-tolyl)-N<sup>2</sup>,N<sup>9</sup>-diethyl-7-fluoro-4-oxo-1,4-dihydro-1,10-phenanthroline-2,9-dicarboxamide (2c) with neodymium trinitrate**

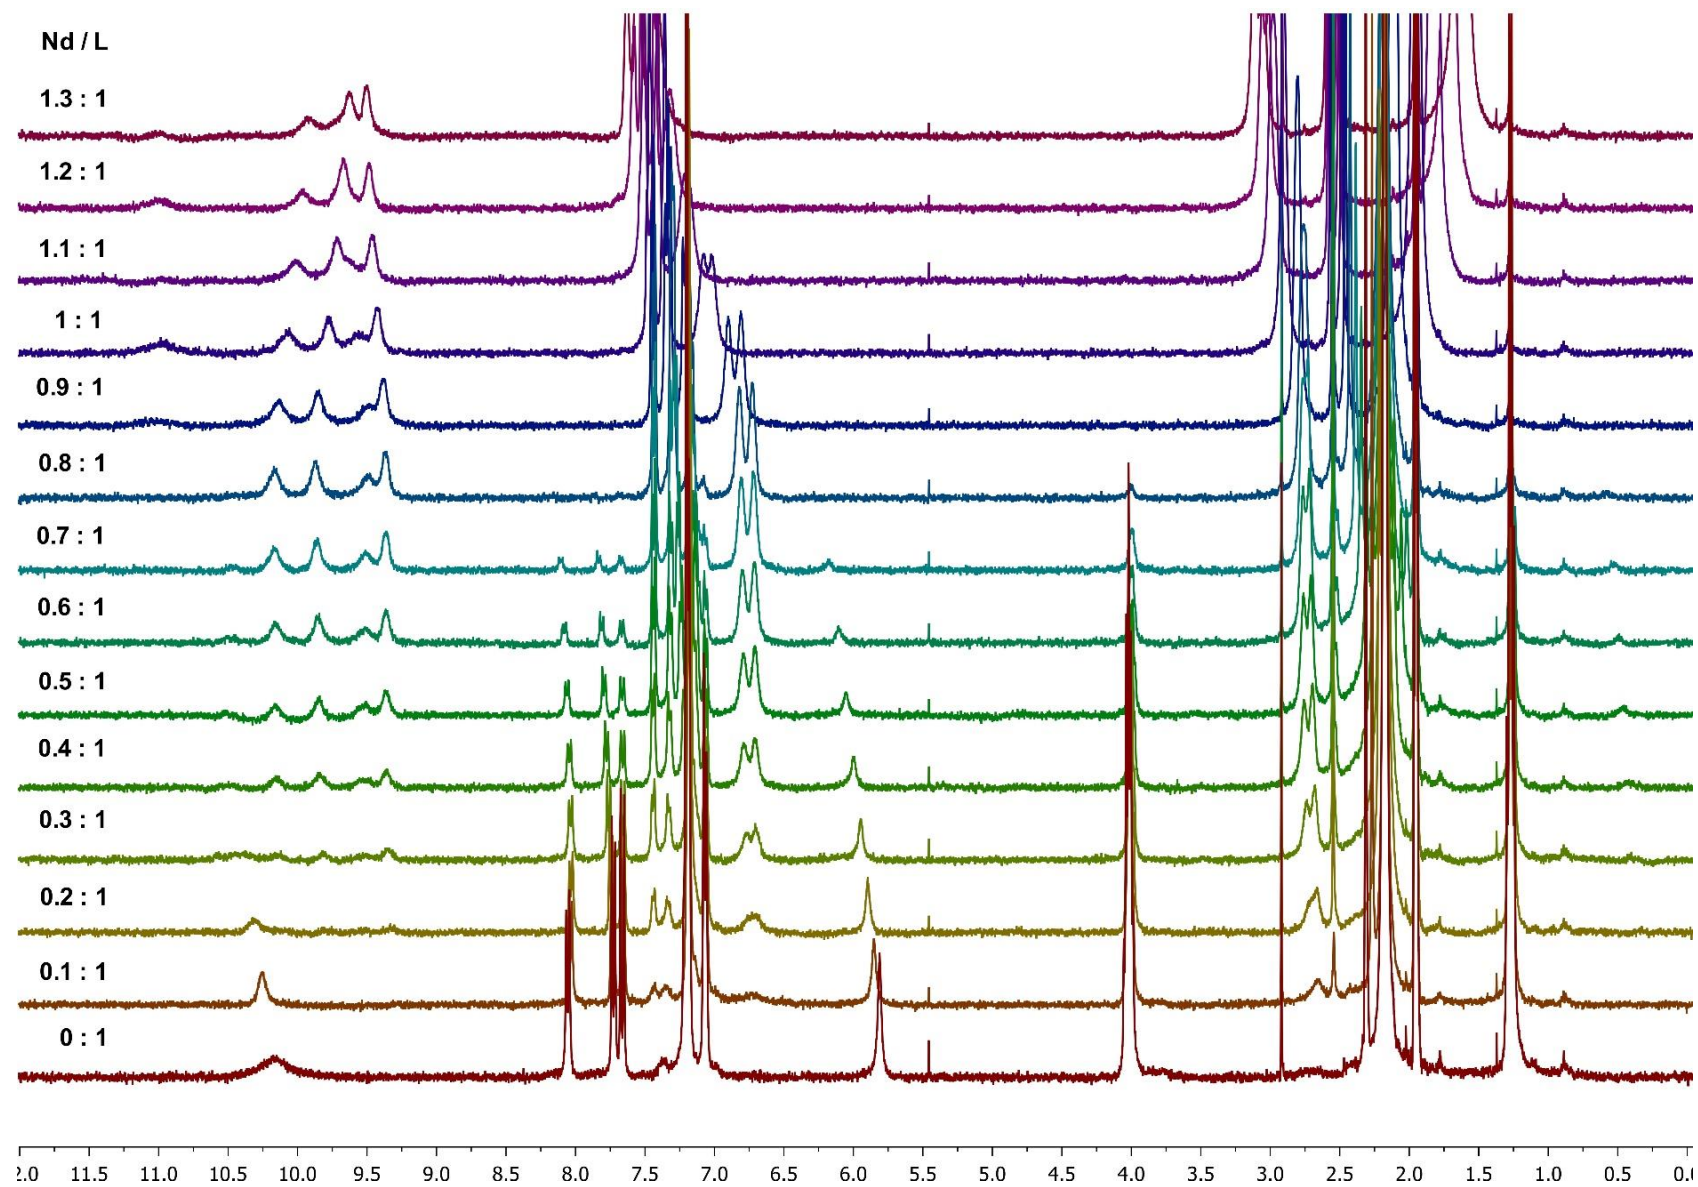

**Figure S44.** NMR titration of **2c** with Nd(NO<sub>3</sub>)<sub>3</sub>·6H<sub>2</sub>O in CD<sub>3</sub>CN

**$N^2,N^9$ -bis(p-tolyl)- $N^2,N^9$ -diethyl-7-fluoro-4-oxo-1,4-dihydro-1,10-phenanthroline-2,9-dicarboxamide (2c) with europium trinitrate**

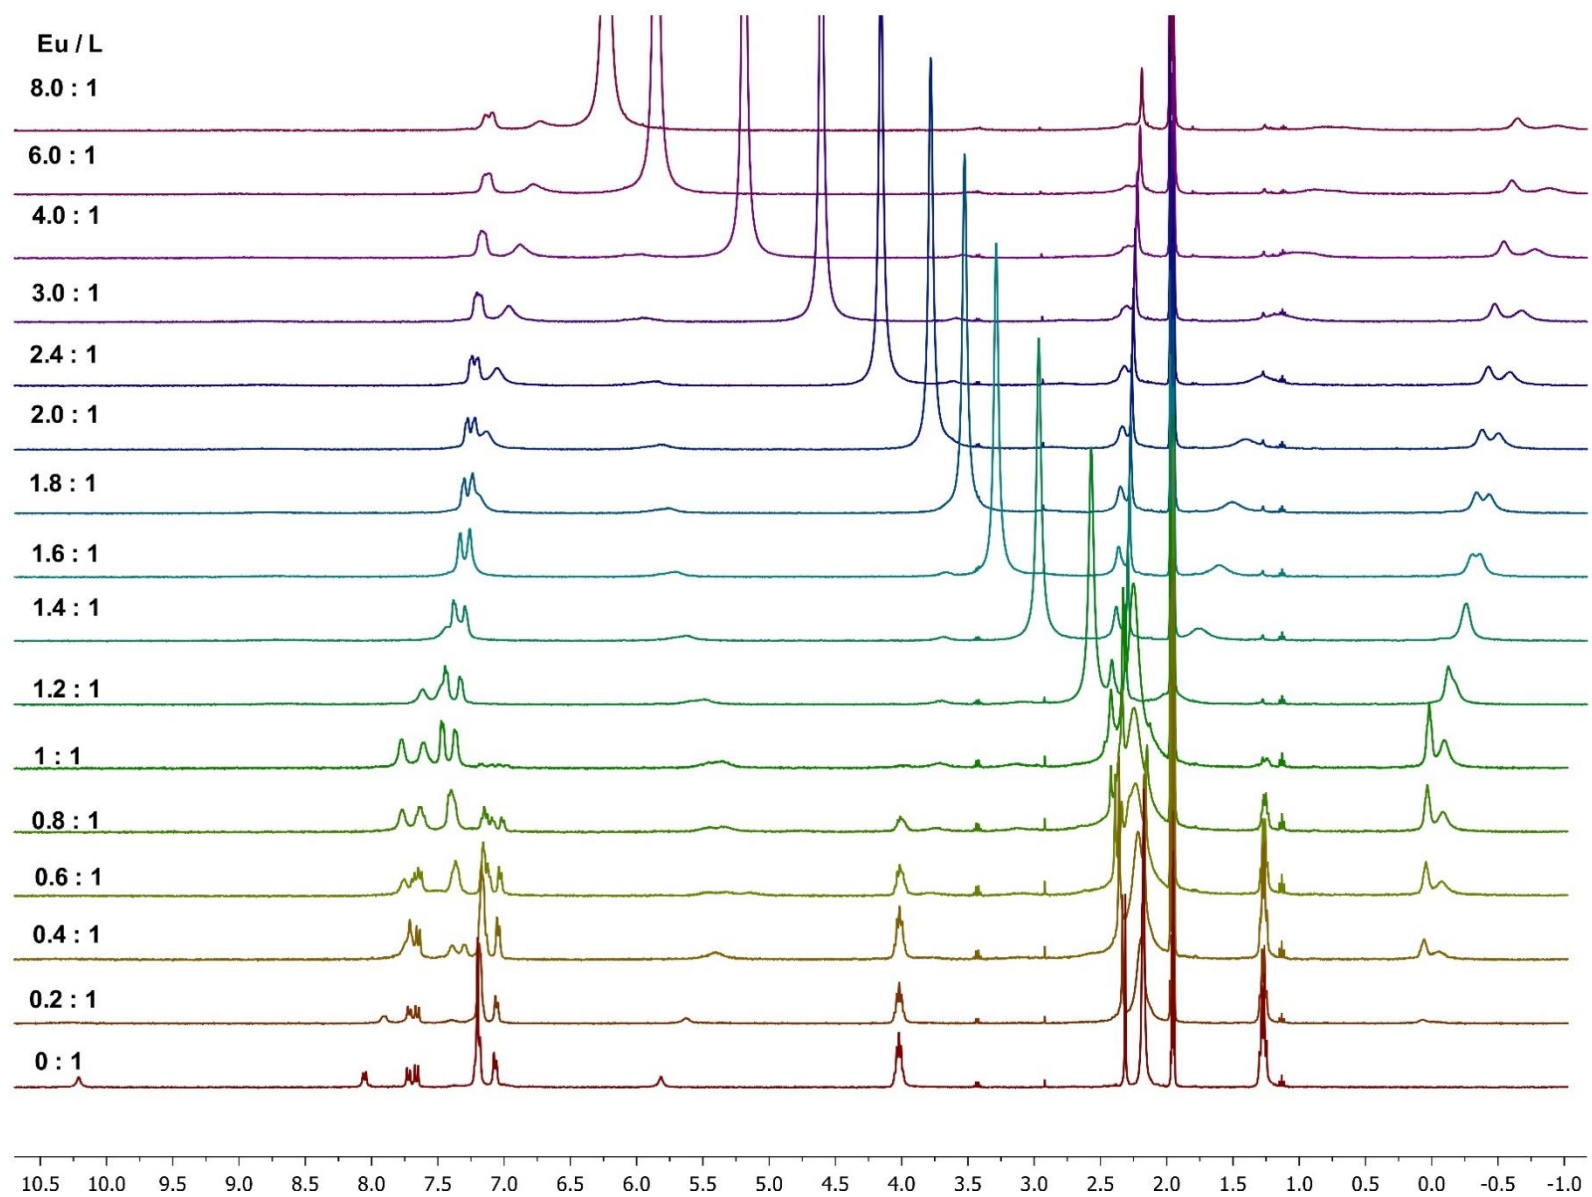

**Figure S45.** NMR titration of **2c** with  $\text{Eu}(\text{NO}_3)_3 \cdot 6\text{H}_2\text{O}$  in  $\text{CD}_3\text{CN}$

**$N^2,N^9$ -bis(p-tolyl)- $N^2,N^9$ -diethyl-7-fluoro-4-oxo-1,4-dihydro-1,10-phenanthroline-2,9-dicarboxamide (2c) with lutetium trinitrate**

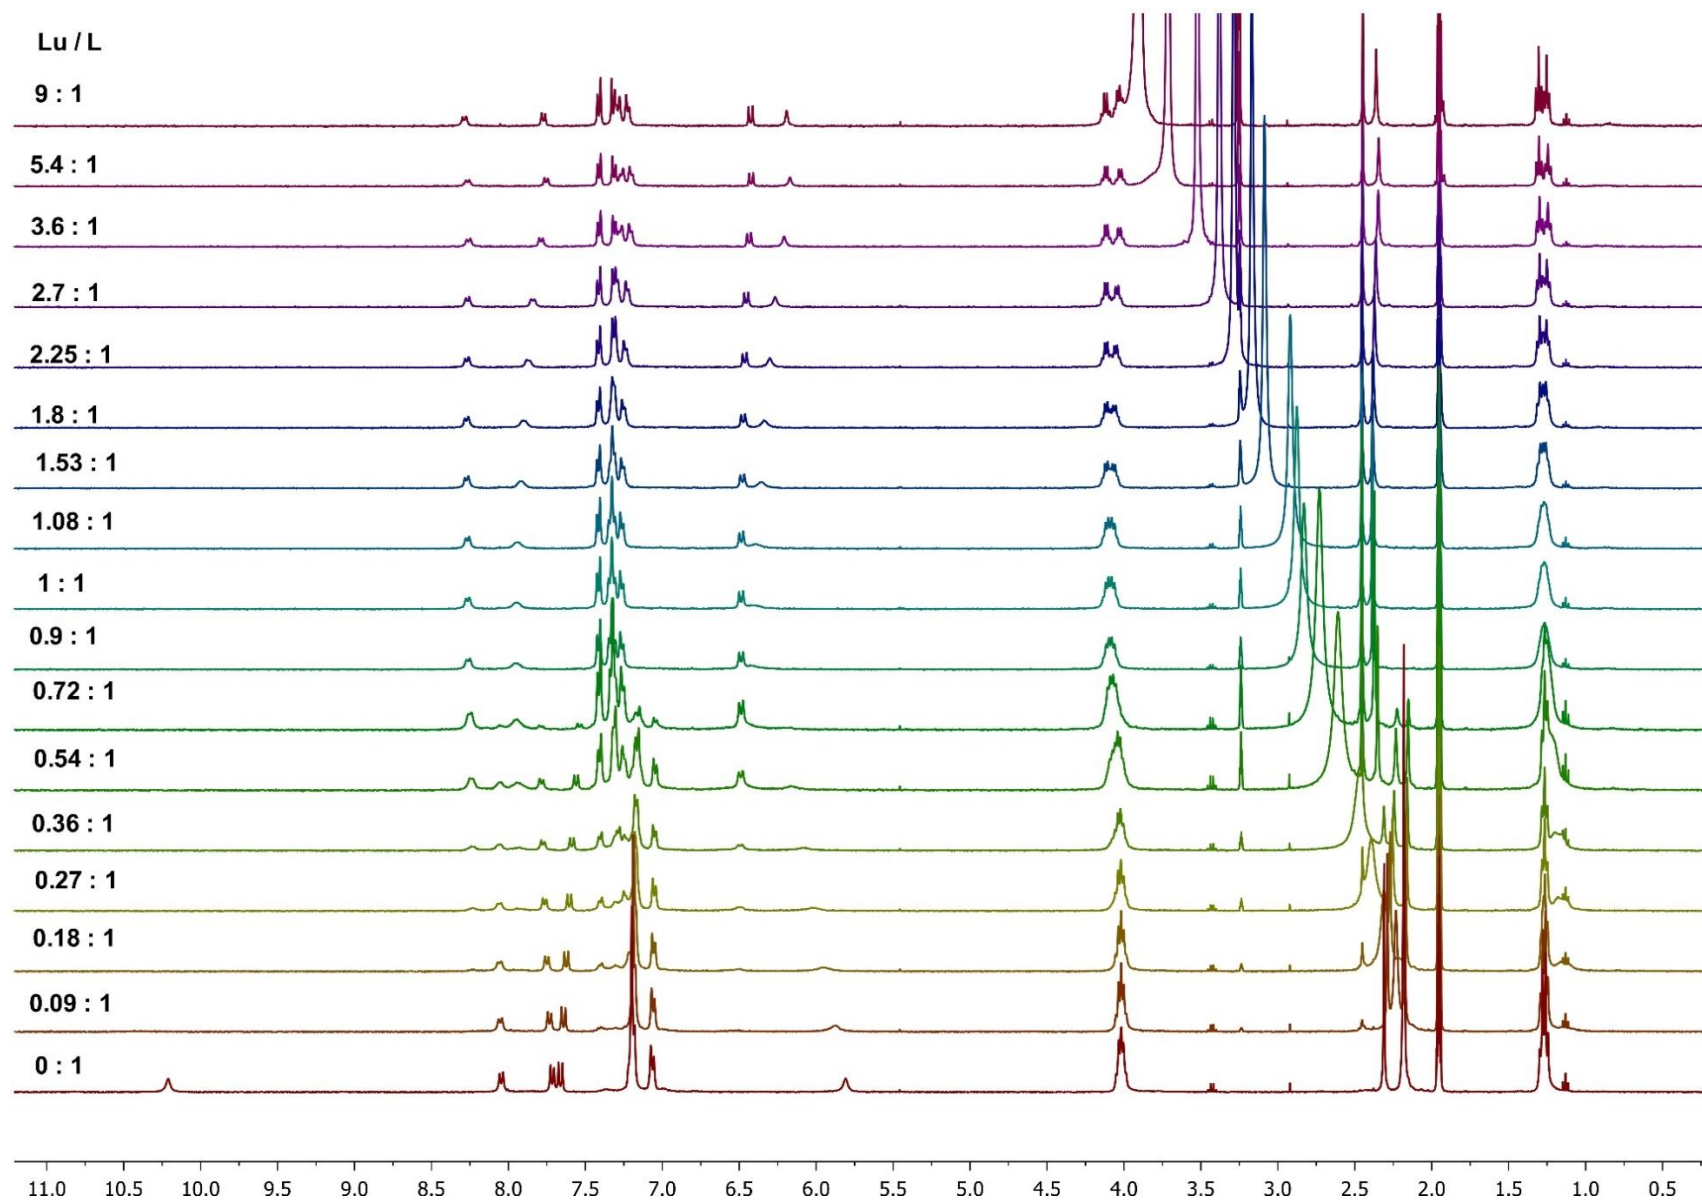

**Figure S46.** NMR titration of **2c** with  $\text{Lu}(\text{NO}_3)_3 \cdot 6\text{H}_2\text{O}$  in  $\text{CD}_3\text{CN}$

$N^2,N^2,N^9,N^9$ -tetrabutyl-4,7-dihydroxy-1,10-phenanthroline-2,9-dicarboxamide (**5a**) with neodymium trinitrate

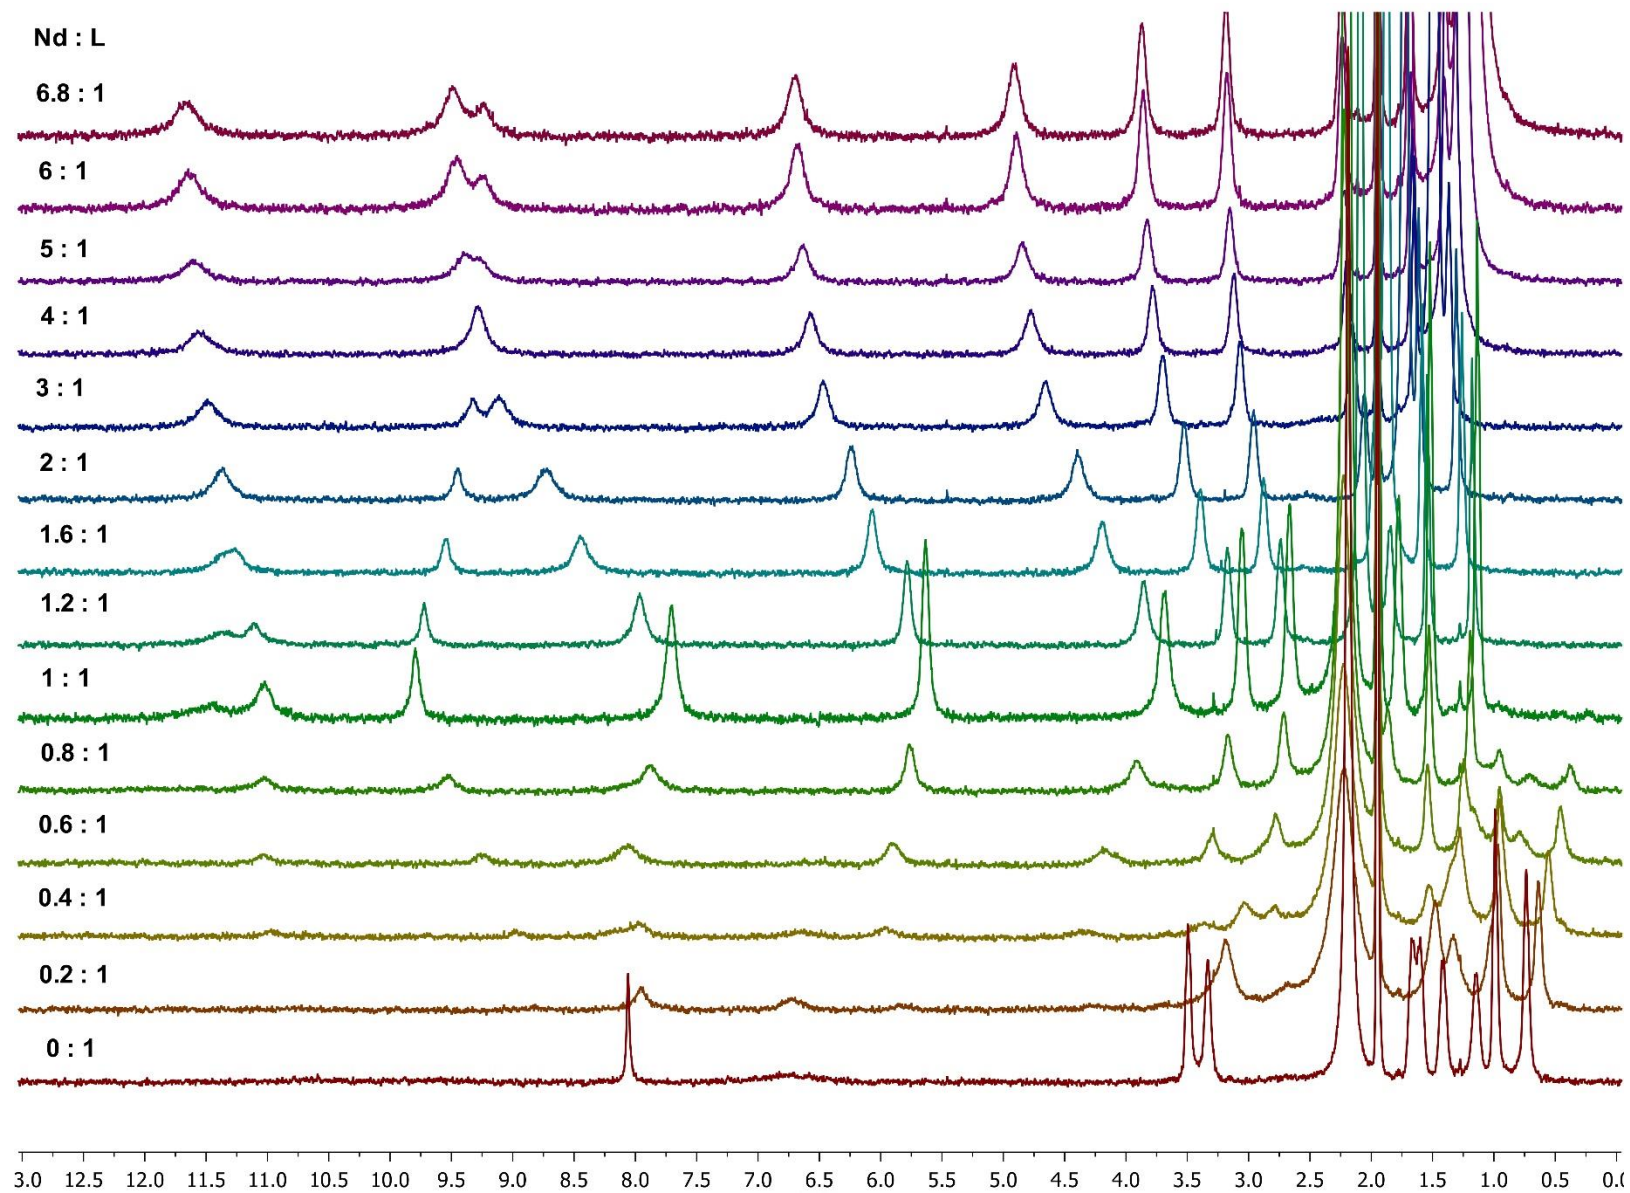

**Figure S47.** NMR titration of **5a** with  $Nd(NO_3)_3 \cdot 6H_2O$  in  $CD_3CN$



$N^2,N^2,N^9,N^9$ -tetrabutyl-4,7-dihydroxy-1,10-phenanthroline-2,9-dicarboxamide (**5a**) with europium trinitrate

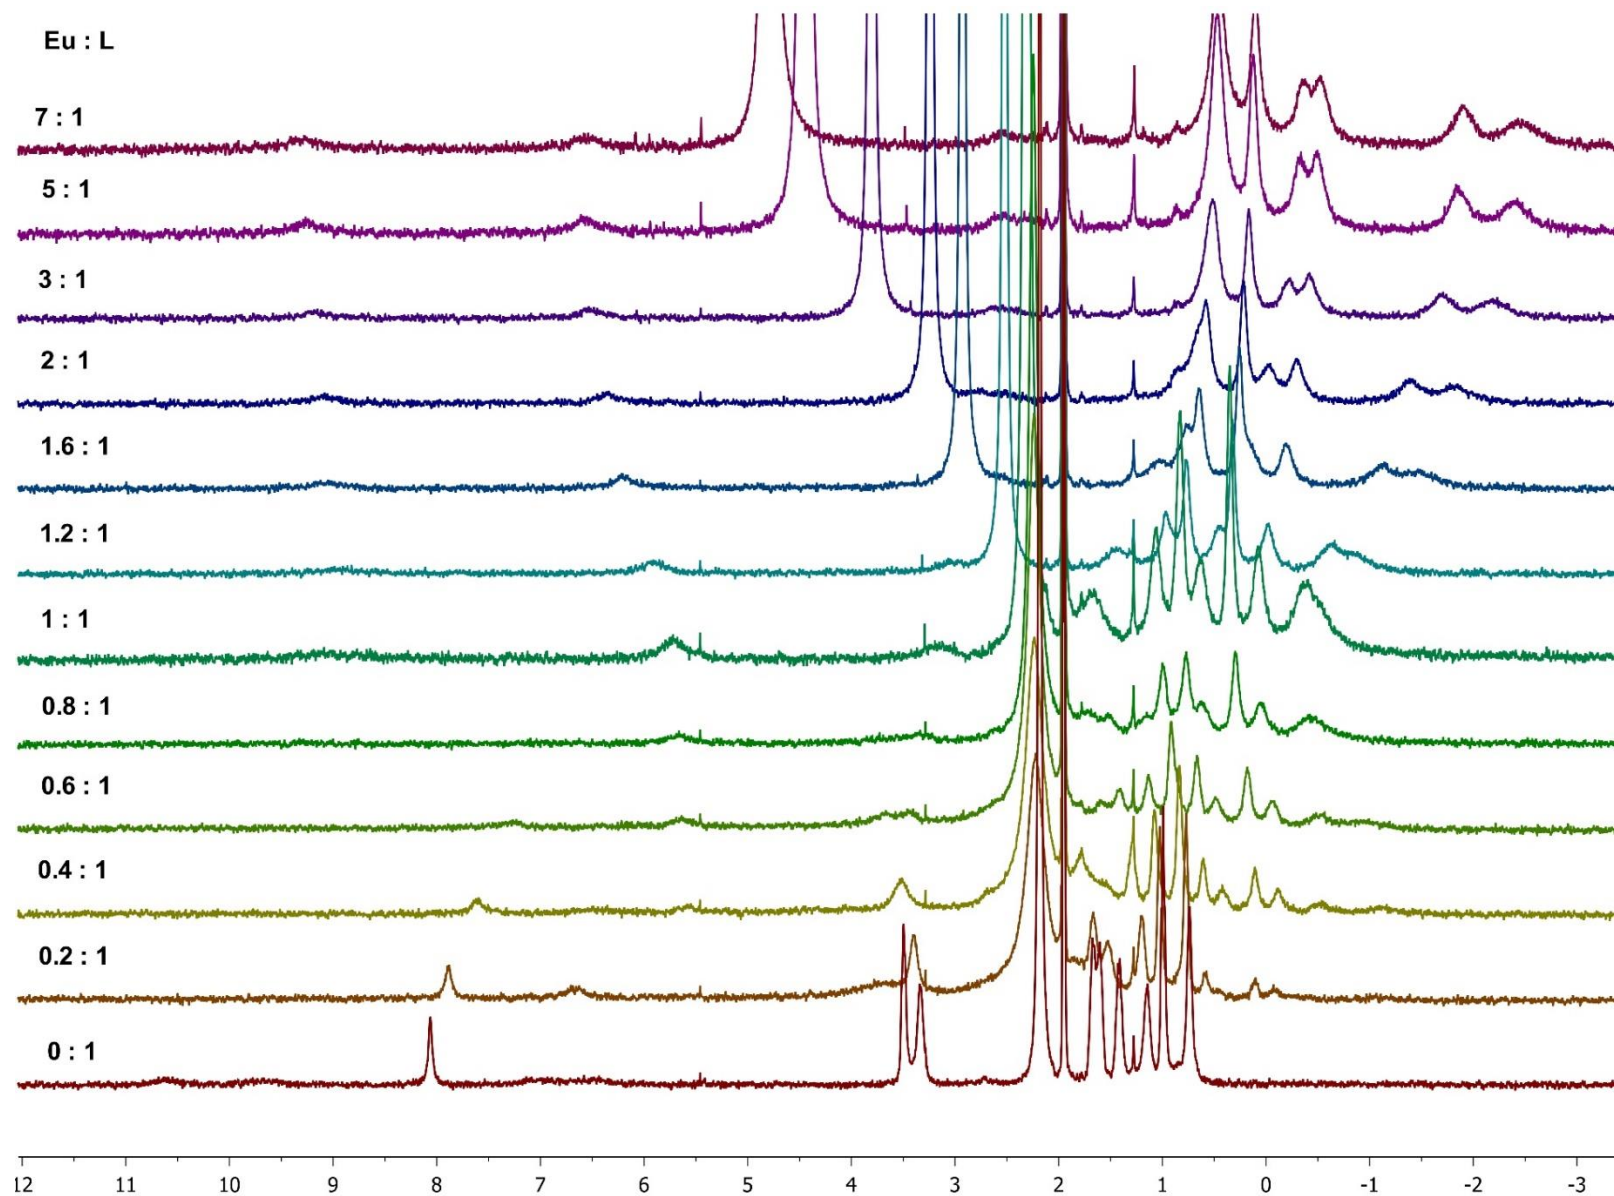

Figure S48. NMR titration of **5a** with  $\text{Eu}(\text{NO}_3)_3 \cdot 6\text{H}_2\text{O}$  in  $\text{CD}_3\text{CN}$

$N^2,N^2,N^9,N^9$ -tetrabutyl-4,7-dihydroxy-1,10-phenanthroline-2,9-dicarboxamide (**5a**) with lutetium trinitrate

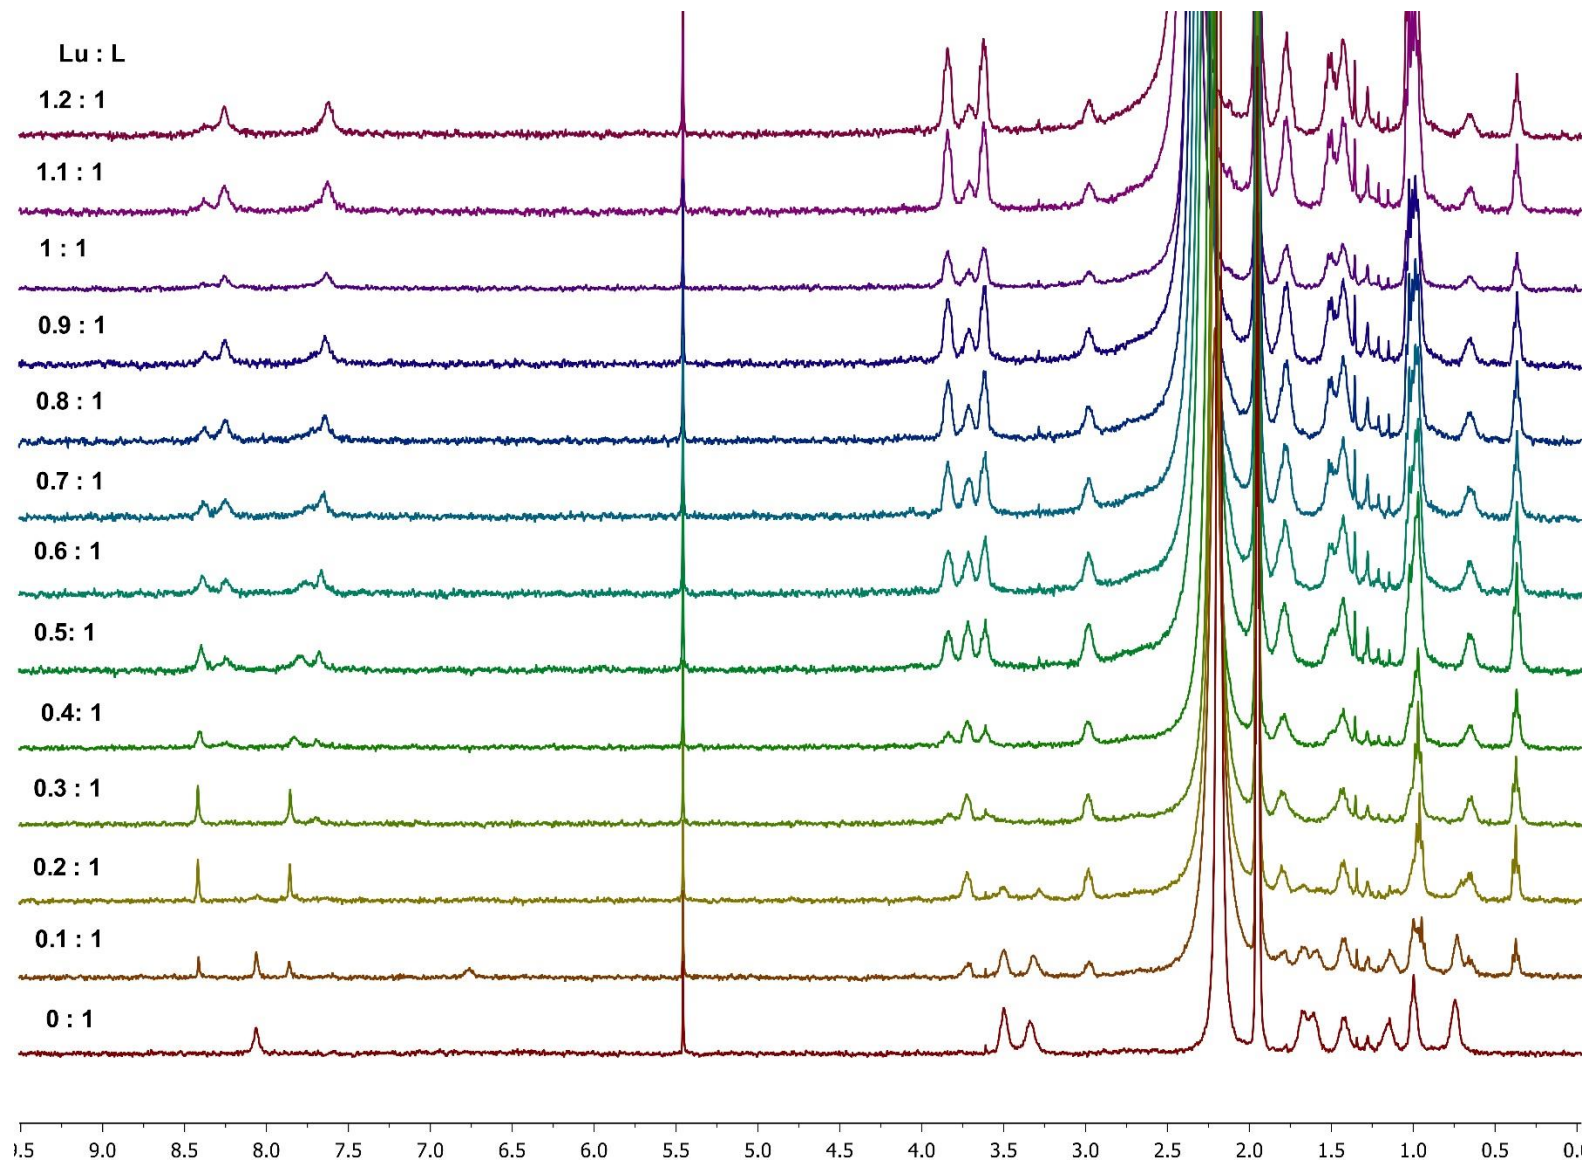

Figure S49. NMR titration of **5a** with  $\text{Lu}(\text{NO}_3)_3 \cdot 6\text{H}_2\text{O}$  in  $\text{CD}_3\text{CN}$

**$N^2,N^9$ -diethyl-7-hydroxy-4-oxo- $N^2,N^9$ -di-*p*-tolyl-1,4-dihydro-1,10-phenanthroline-2,9-dicarboxamide (5c) with neodymium trinitrate**

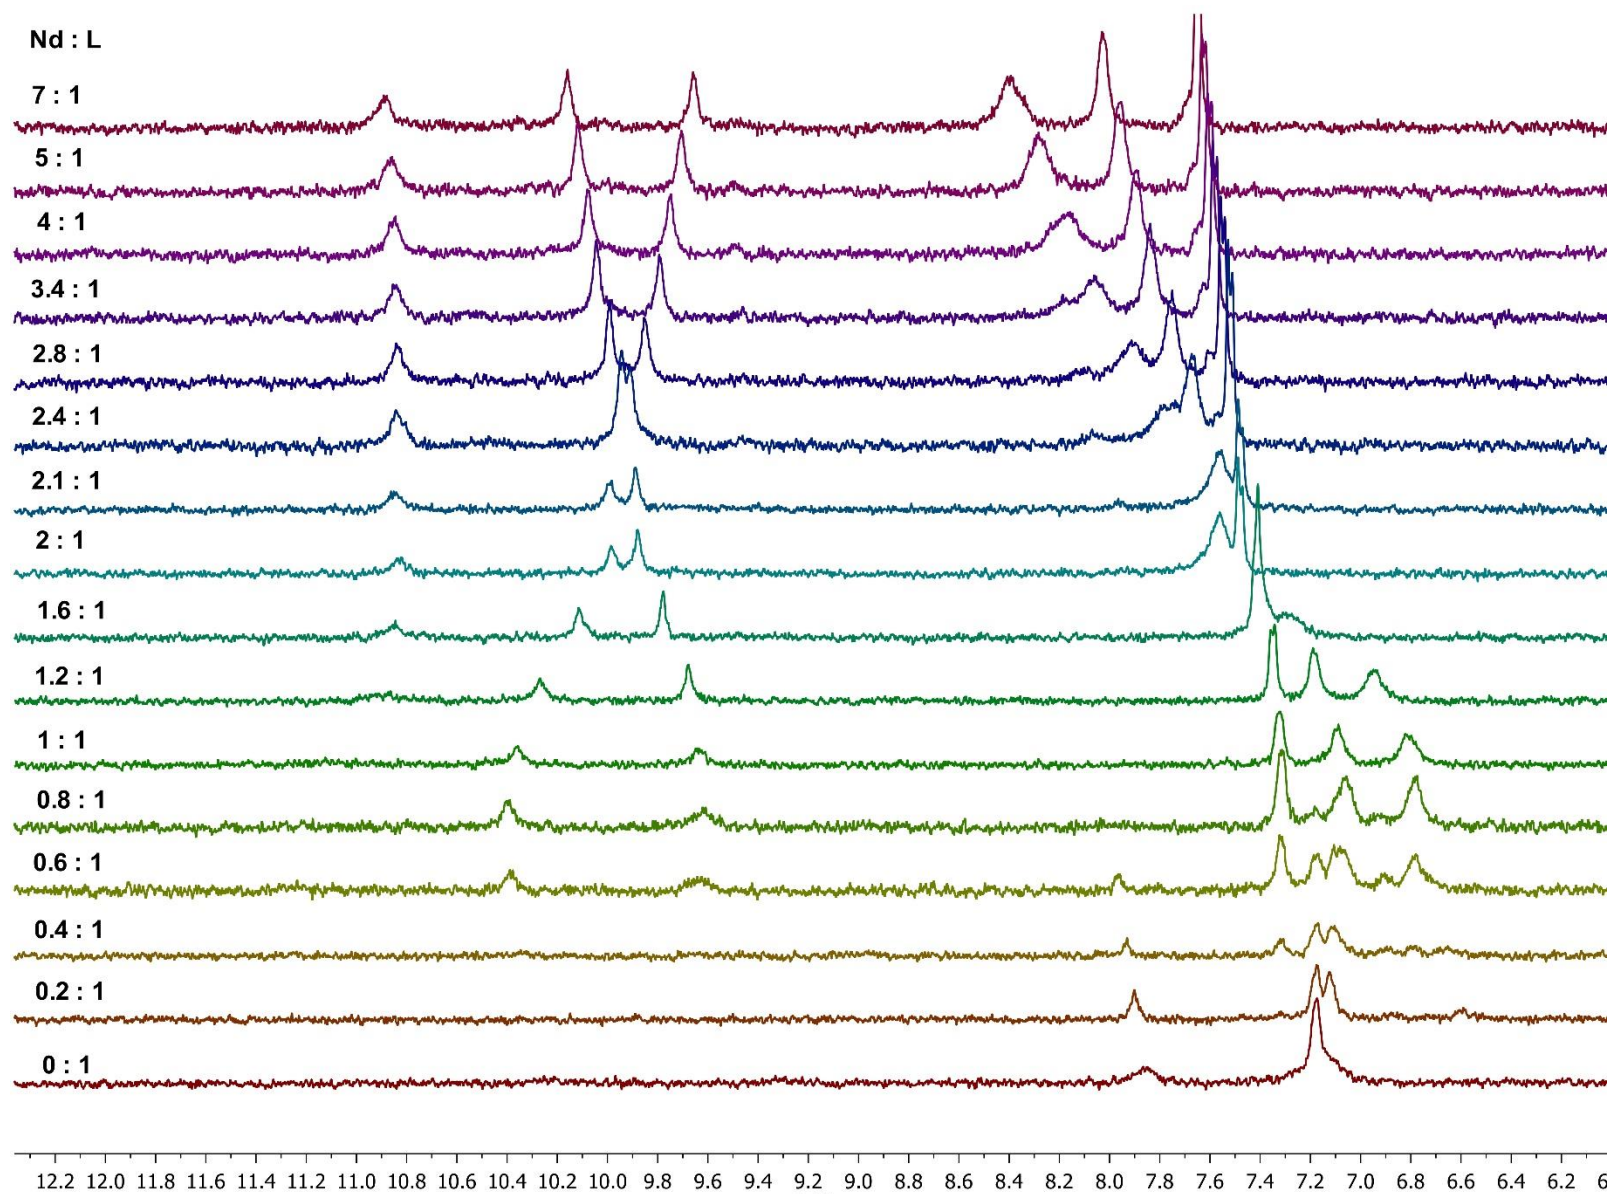

**Figure S50.** Fragmental view of NMR titration of **5c** with  $Nd(NO_3)_3 \cdot 6H_2O$  in  $CD_3CN$

**$N^2,N^9$ -diethyl-7-hydroxy-4-oxo- $N^2,N^9$ -di-*p*-tolyl-1,4-dihydro-1,10-phenanthroline-2,9-dicarboxamide (5c) with europium trinitrate**

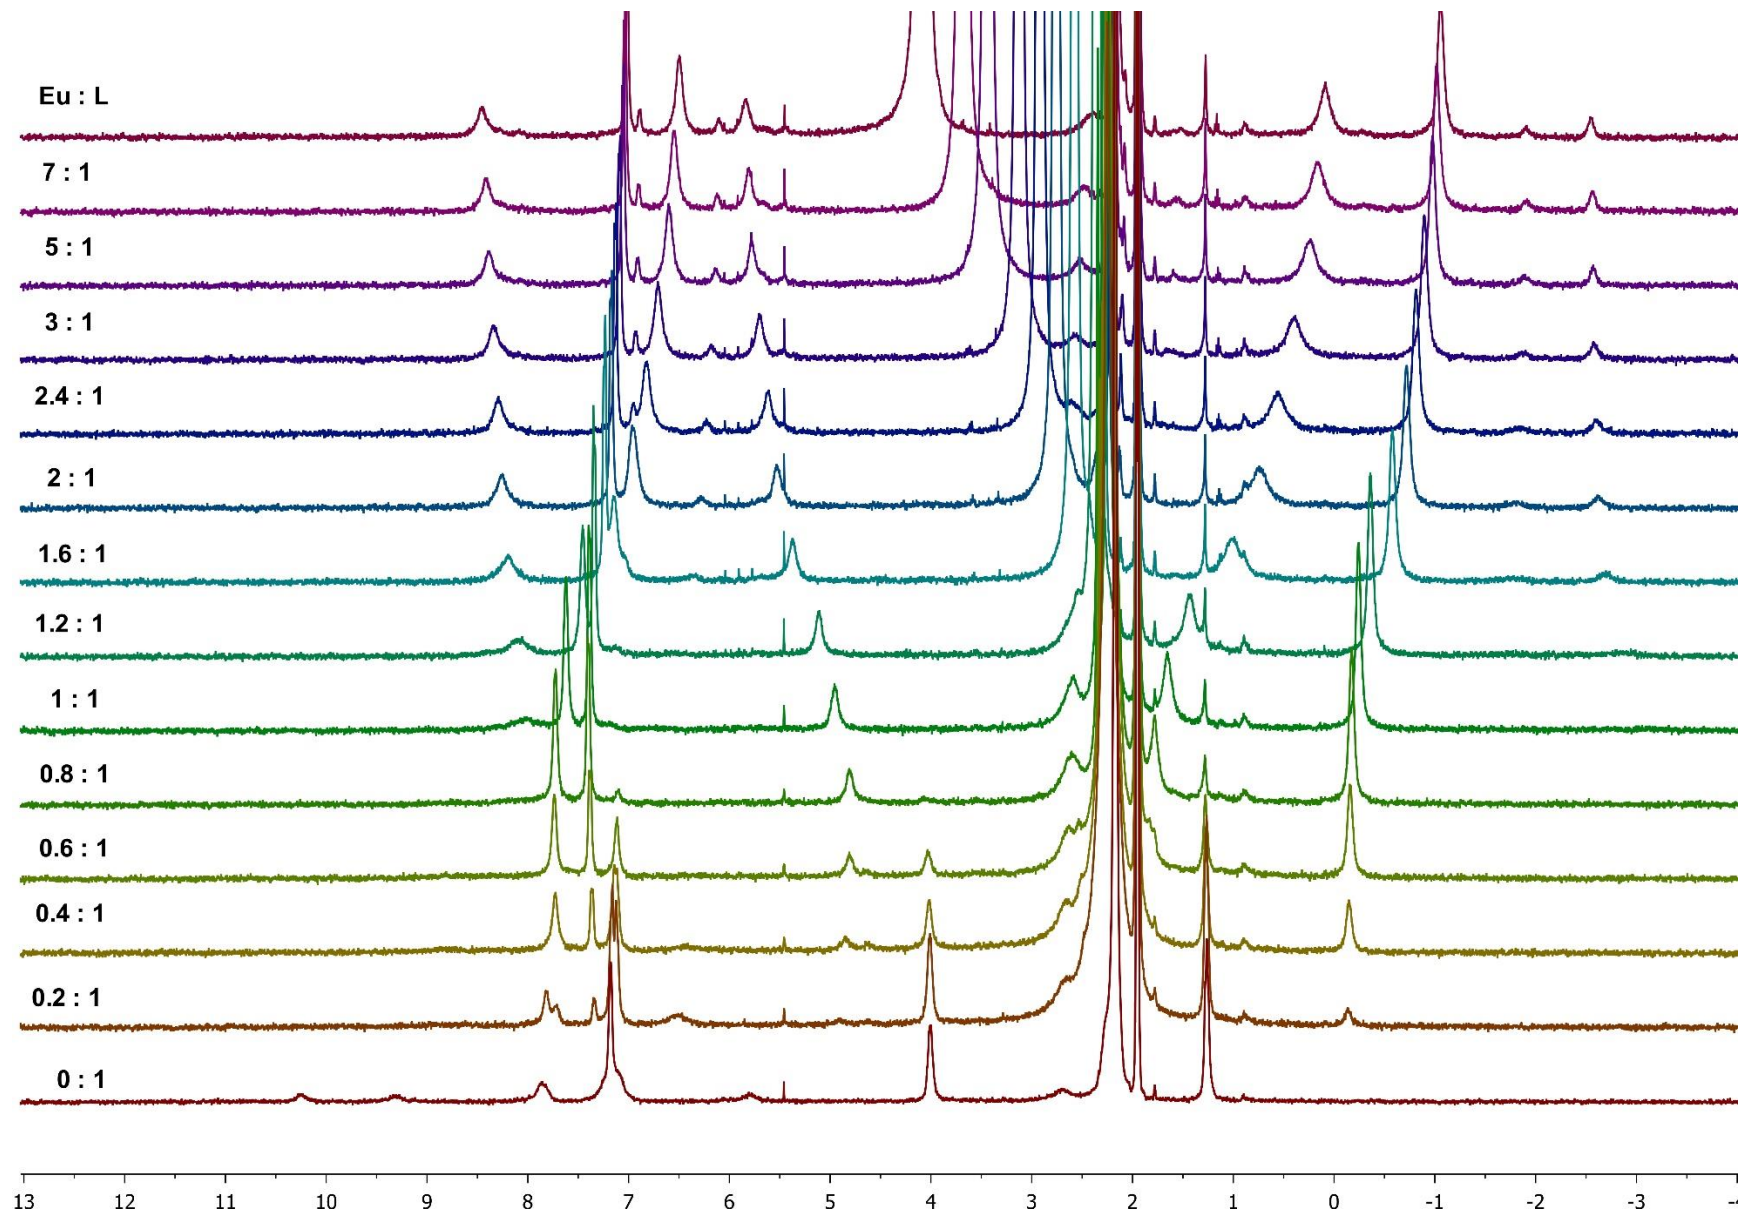

**Figure S51.** NMR titration of **5c** with  $\text{Eu}(\text{NO}_3)_3 \cdot 6\text{H}_2\text{O}$  in  $\text{CD}_3\text{CN}$

**$N^2,N^9$ -diethyl-7-hydroxy-4-oxo- $N^2,N^9$ -di-*p*-tolyl-1,4-dihydro-1,10-phenanthroline-2,9-dicarboxamide (5c) with lutetium trinitrate**

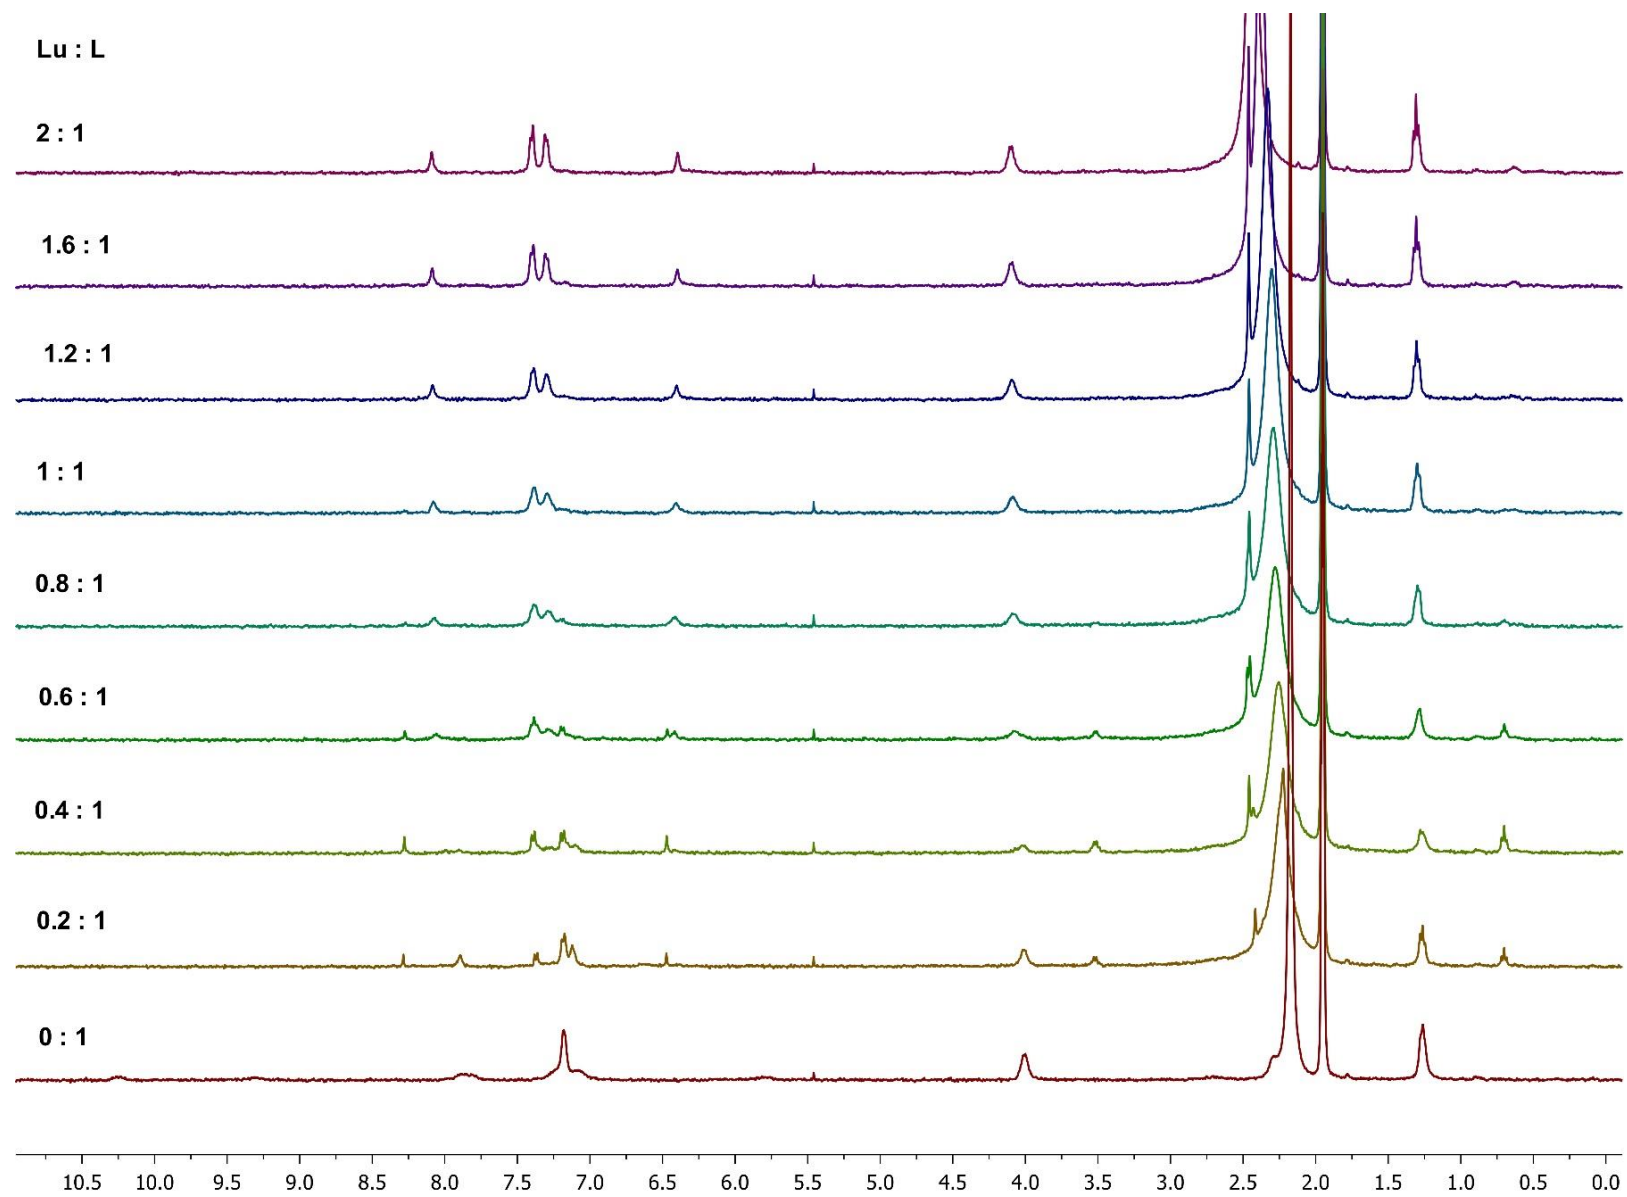

**Figure S52.** NMR titration of **5c** with Lu(NO<sub>3</sub>)<sub>3</sub>·6H<sub>2</sub>O in CD<sub>3</sub>CN

#### 4. UV-vis titration

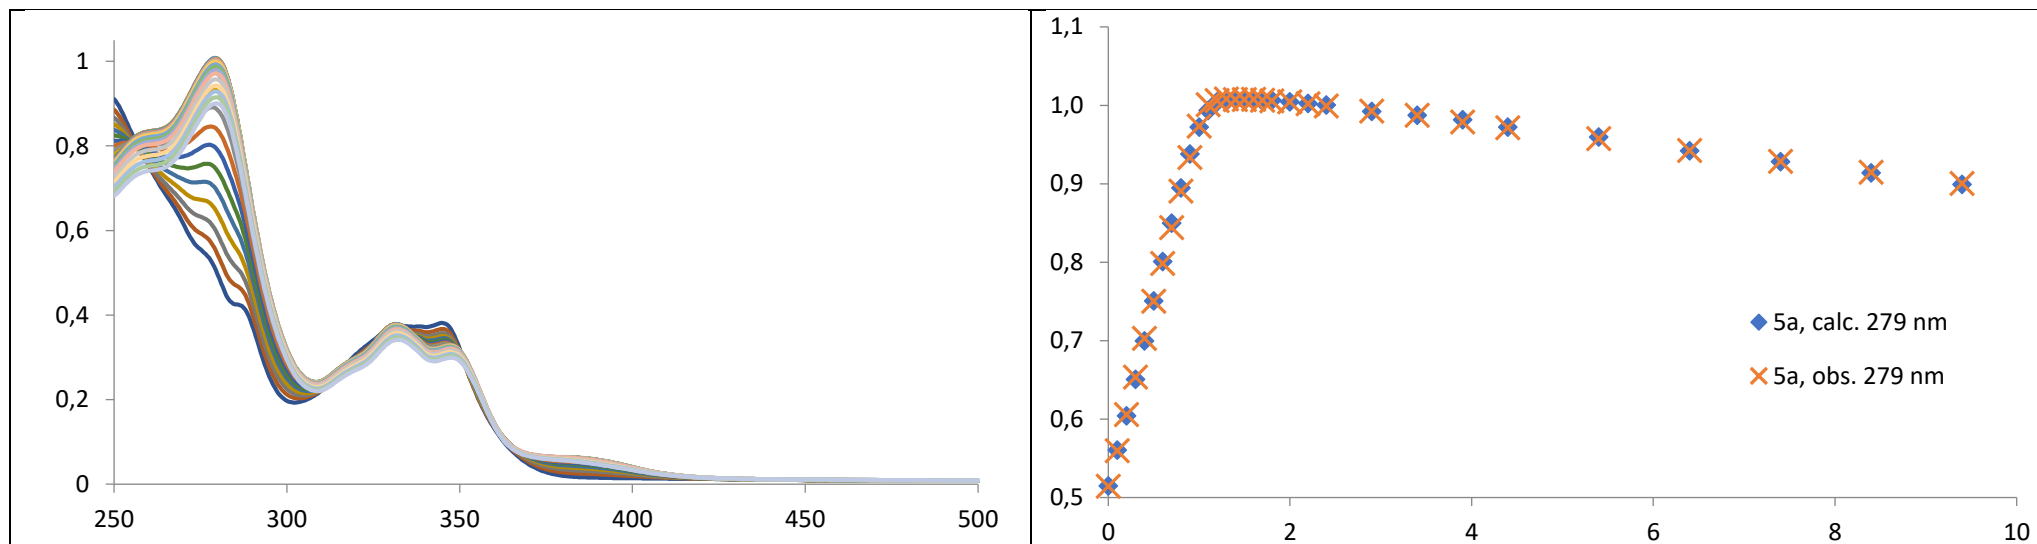

**Figure S53.** Spectrophotometric titration of **5a** with La(NO<sub>3</sub>)<sub>3</sub> in CH<sub>3</sub>CN solution

**Figure S54.** Titration curves of **5a** with La (III) at 279 nm, calculated vs observed

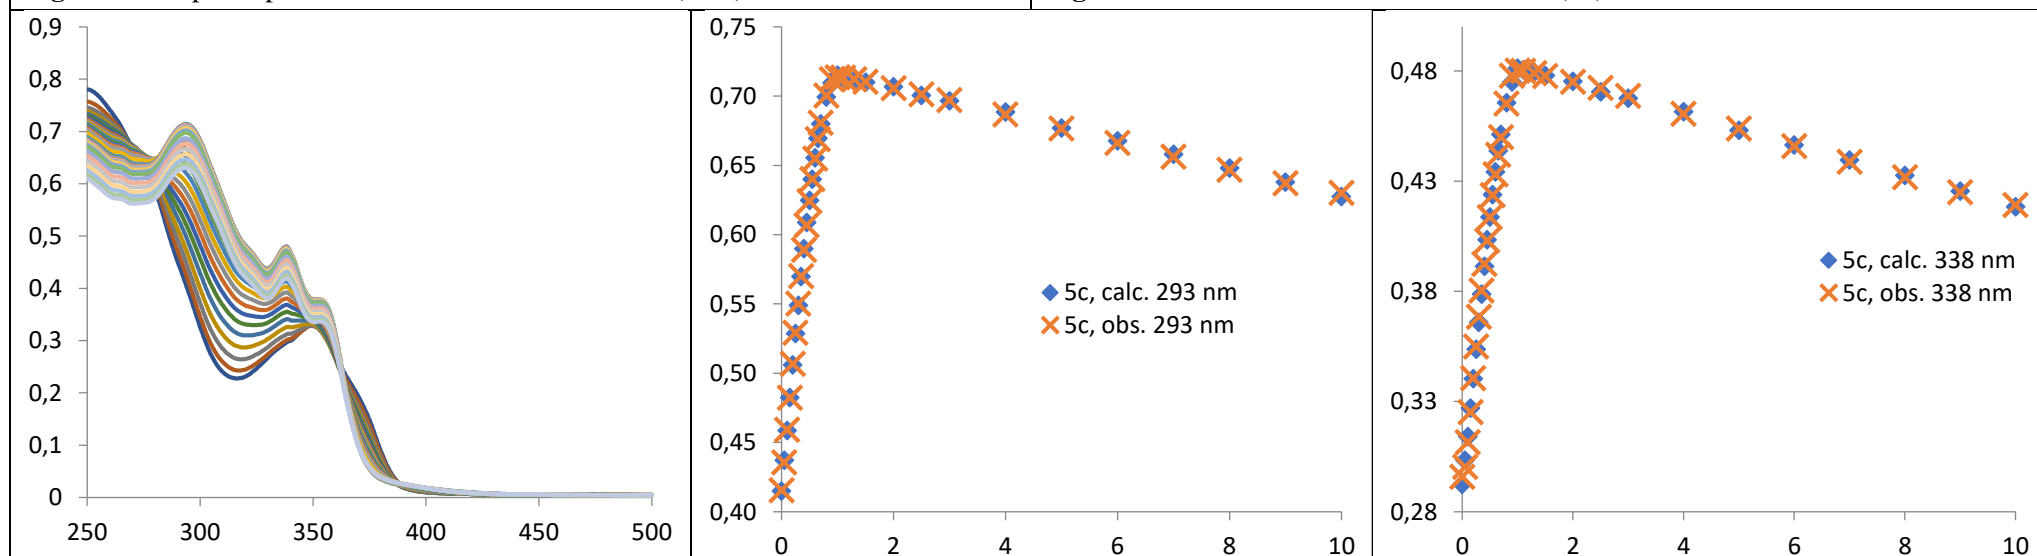

**Figure S55.** Spectrophotometric titration of **5c** with La(NO<sub>3</sub>)<sub>3</sub> in CH<sub>3</sub>CN solution

**Figure S56.** Titration curves of **5c** with La (III) at 293 nm, calculated vs observed

**Figure S57.** Titration curves of **5c** with La (III) at 338 nm, calculated vs observed

## 5. Theoretical computations

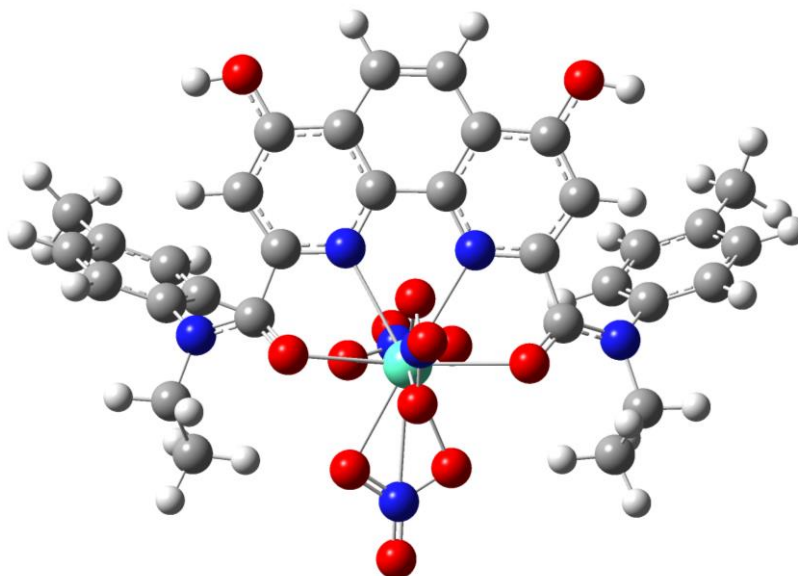

**Figure S58.** DFT optimized geometry of **5c•Eu(NO<sub>3</sub>)<sub>3</sub>**

### Cartesian Coordinates

|    |           |           |          |
|----|-----------|-----------|----------|
| Eu | 1.272052  | 2.073416  | 5.146673 |
| O  | 3.529477  | 2.003227  | 4.047808 |
| O  | -1.188142 | 1.776782  | 5.595258 |
| O  | 2.471614  | -0.258486 | 8.297168 |
| O  | 0.526920  | 1.638627  | 2.849710 |
| O  | 0.907337  | -0.084570 | 4.113131 |
| N  | 5.454310  | 3.207699  | 4.154906 |
| O  | 0.957777  | 0.940539  | 7.257781 |
| N  | 2.060017  | 4.120033  | 3.531412 |
| N  | -2.907579 | 2.852090  | 6.619393 |
| O  | 0.669357  | 3.907362  | 6.819370 |
| N  | 2.128260  | 0.403694  | 7.339155 |
| N  | -0.507321 | 3.946161  | 4.236746 |
| O  | 0.170867  | -0.377002 | 2.069463 |
| N  | 0.519430  | 0.358192  | 2.971858 |
| O  | 2.069754  | 5.420024  | 7.560881 |
| O  | 2.892535  | 0.627374  | 6.335876 |
| N  | 1.847082  | 4.387557  | 6.947366 |
| O  | 2.783868  | 3.719291  | 6.378643 |
| C  | -3.473902 | 4.112307  | 7.017833 |

|   |           |           |          |
|---|-----------|-----------|----------|
| C | 4.140003  | 3.071028  | 3.864000 |
| C | 7.873506  | 6.035940  | 3.904033 |
| H | 8.780889  | 6.280768  | 3.357144 |
| C | -0.192670 | 4.851857  | 3.291513 |
| C | 3.348850  | 4.191161  | 3.222878 |
| C | -4.864765 | 4.278456  | 7.032649 |
| H | -5.508396 | 3.458774  | 6.724833 |
| C | 1.199779  | 4.956806  | 2.920849 |
| C | 7.242493  | 4.816118  | 3.667636 |
| H | 7.649375  | 4.118683  | 2.940069 |
| C | 6.179603  | 2.010085  | 4.658582 |
| H | 7.210851  | 2.102318  | 4.304599 |
| H | 5.724127  | 1.1419370 | 4.180727 |
| C | -1.766972 | 3.851582  | 4.635563 |
| C | 0.600872  | 6.734925  | 1.323822 |
| H | 0.920606  | 7.448857  | 0.572553 |
| C | 2.975001  | 5.956769  | 1.634056 |
| C | -0.718244 | 6.628118  | 1.666755 |
| H | -1.464609 | 7.254583  | 1.191968 |
| C | -2.805282 | 4.614031  | 4.069055 |
| H | -3.827441 | 4.495651  | 4.411823 |
| C | 6.074680  | 4.487964  | 4.366342 |
| C | 3.857313  | 5.099933  | 2.278291 |
| H | 4.918508  | 5.125928  | 2.054503 |
| C | -3.085396 | 1.697068  | 7.539160 |
| H | -2.894127 | 0.795392  | 6.955176 |
| H | -4.137928 | 1.701244  | 7.837966 |
| C | -1.142488 | 5.688646  | 2.660998 |
| C | 7.358931  | 6.950613  | 4.835677 |
| C | 1.588510  | 5.904188  | 1.944874 |
| C | -5.413845 | 5.496446  | 7.426190 |
| H | -6.495088 | 5.616847  | 7.430272 |
| C | -1.943413 | 2.761716  | 5.672119 |
| C | 6.188766  | 6.602886  | 5.523338 |
| H | 5.773057  | 7.290786  | 6.255719 |



|   |            |          |          |
|---|------------|----------|----------|
| C | 5.550429   | 5.380671 | 5.308785 |
| H | 4.661014   | 5.111903 | 5.874026 |
| C | -3.209078  | 6.380138 | 7.802874 |
| H | -2.555000  | 7.192271 | 8.109603 |
| C | -2.641974  | 5.161990 | 7.421703 |
| H | -1.563086  | 5.023424 | 7.434512 |
| C | -2.494064  | 5.528457 | 3.072558 |
| C | -4.596148  | 6.571419 | 7.812074 |
| C | 8.068604   | 8.254403 | 5.114543 |
| H | 7.375602   | 9.016100 | 5.483720 |
| H | 8.558689   | 8.645818 | 4.217399 |
| C | -2.167720  | 1.751518 | 8.760883 |
| H | -1.118866  | 1.661800 | 8.468587 |
| H | -2.4082810 | 0.915634 | 9.426670 |
| H | -2.309440  | 2.681546 | 9.321076 |
| C | -5.205401  | 7.889610 | 8.229303 |
| H | -5.862098  | 7.766860 | 9.098557 |
| H | -5.814875  | 8.320121 | 7.425403 |
| C | 6.132875   | 1.870458 | 6.179870 |
| H | 6.542827   | 2.756695 | 6.674120 |
| H | 6.736951   | 1.007031 | 6.478003 |
| H | 5.110184   | 1.703094 | 6.523433 |
| H | 8.846151   | 8.122682 | 5.877726 |
| H | -4.435473  | 8.619807 | 8.492191 |
| O | 3.361470   | 6.854769 | 0.700206 |
| H | 4.318930   | 6.806086 | 0.571439 |
| O | -3.418829  | 6.302932 | 2.460672 |
| H | -4.295250  | 6.118980 | 2.826027 |
